# Supplementary material for: Accounting for nonsampling error in estimates of HIV epidemic trends from antenatal clinic sentinel surveillance
Source: PubMed Central journal article supplement (PMC5679137; doi:10.1097/qad.0000000000001419), 2017-04

r-trend

# Botswana Urban

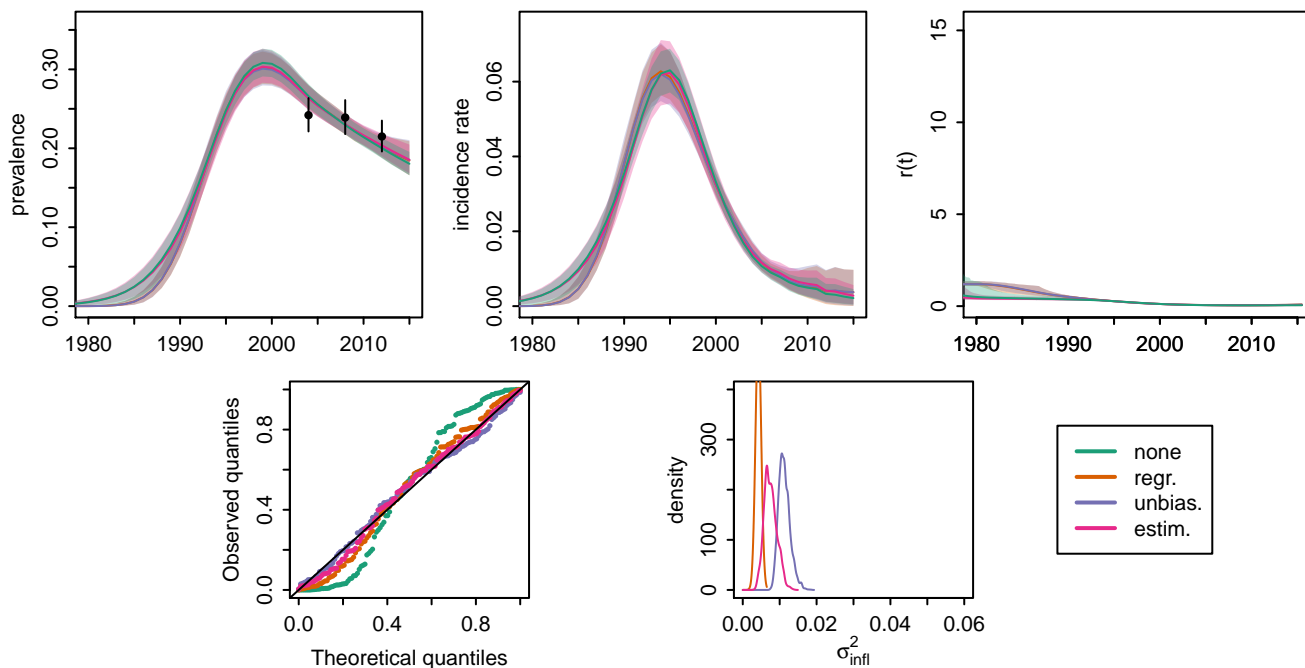

r-spline

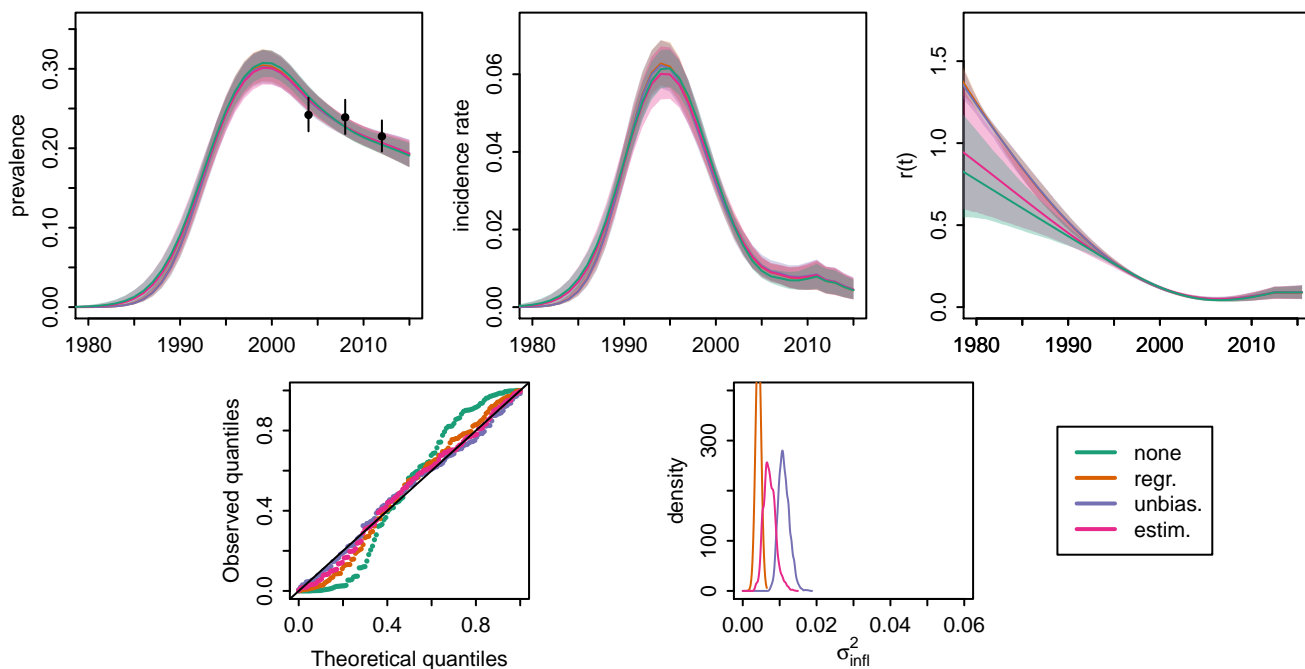

r-spline, no equil. prior

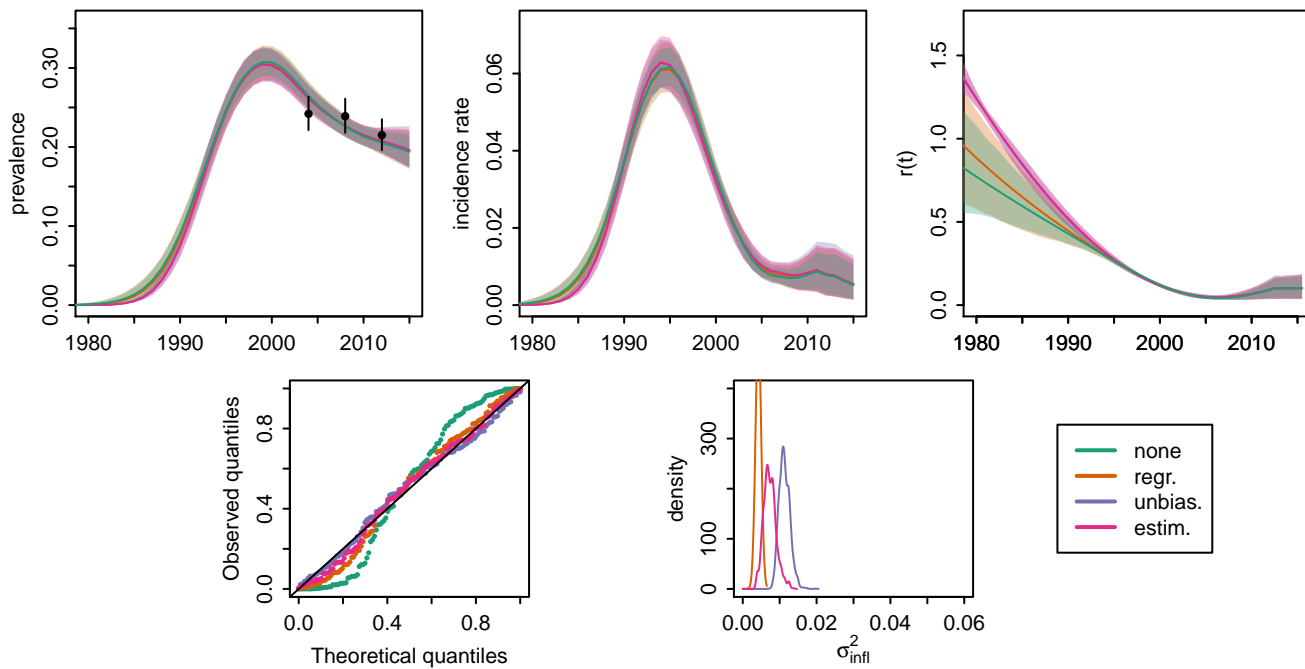

r-trend

# Botswana Rural

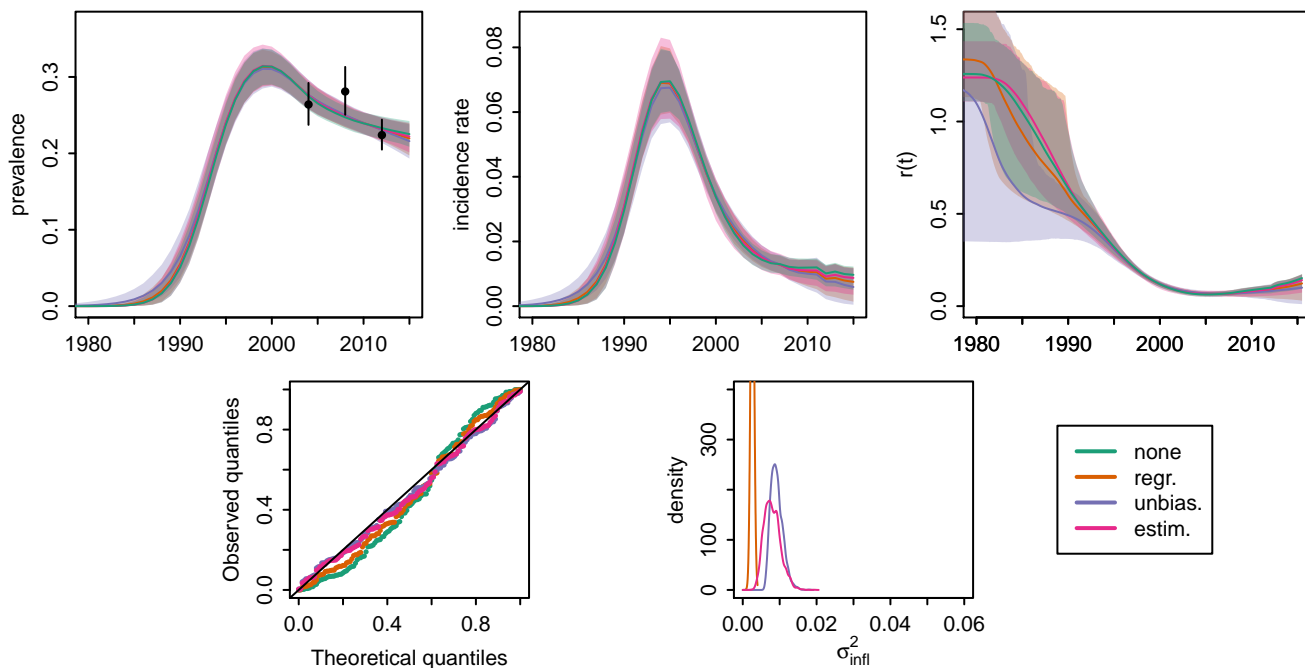

r-spline

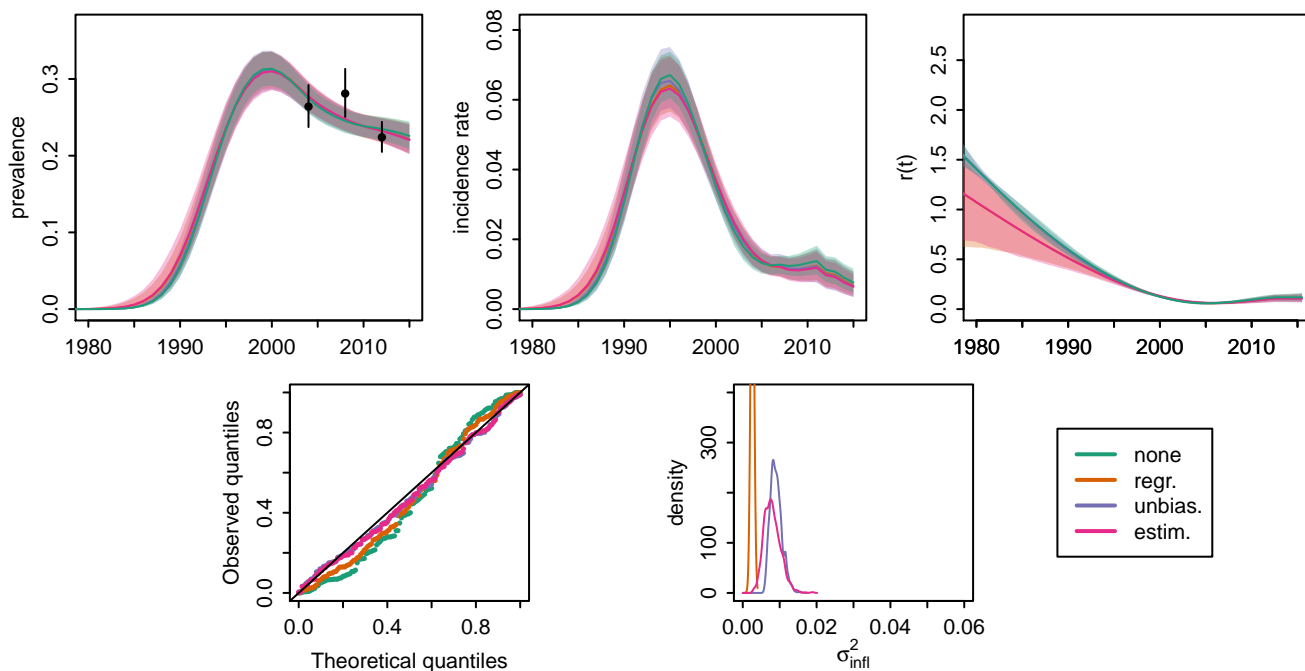

r-spline, no equil. prior

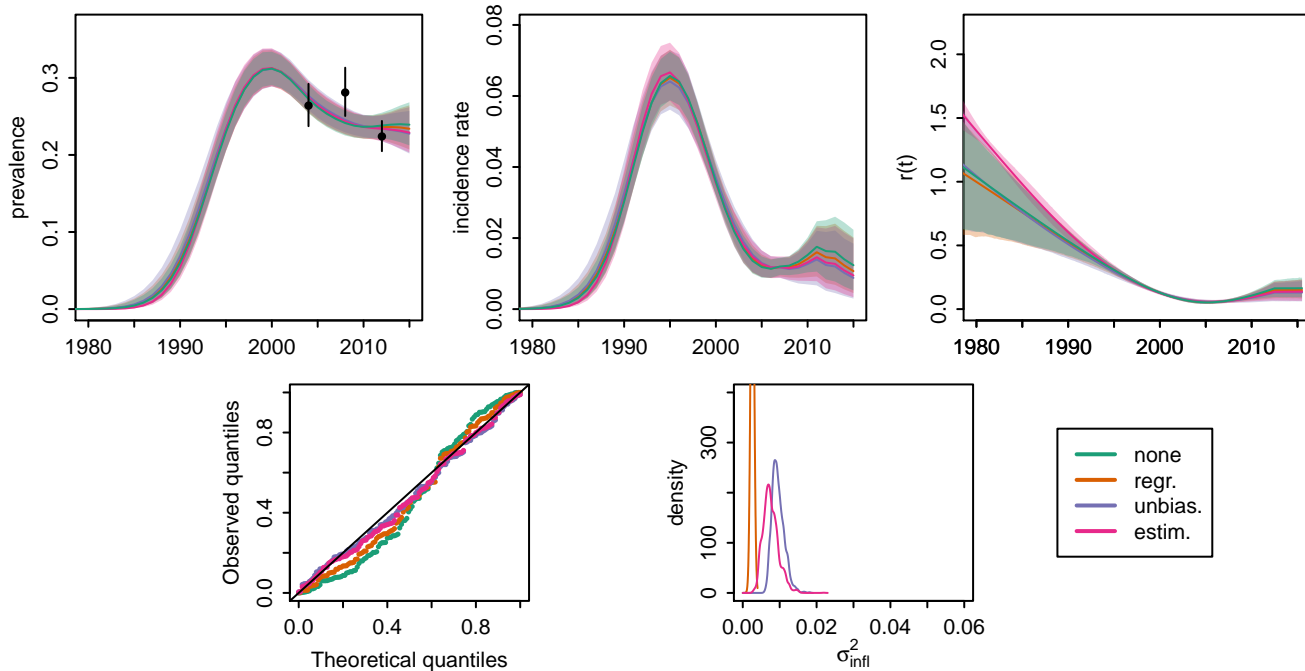

### r-trend

### Lesotho Urban

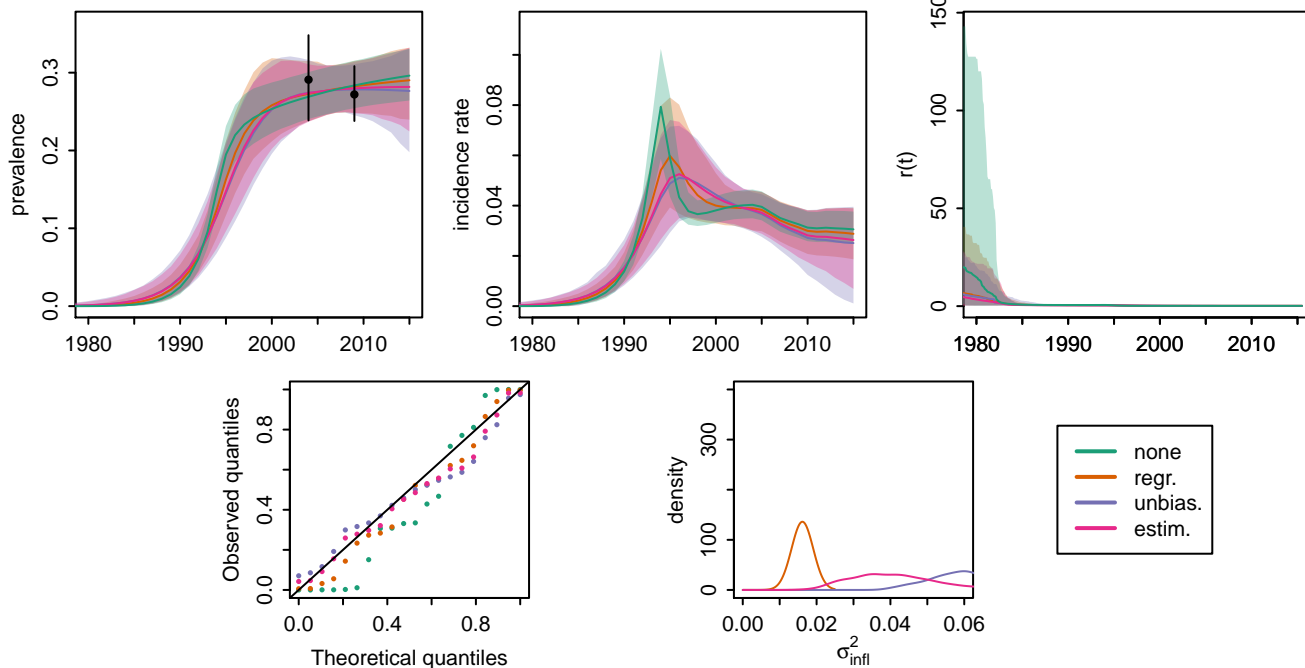

### r-spline

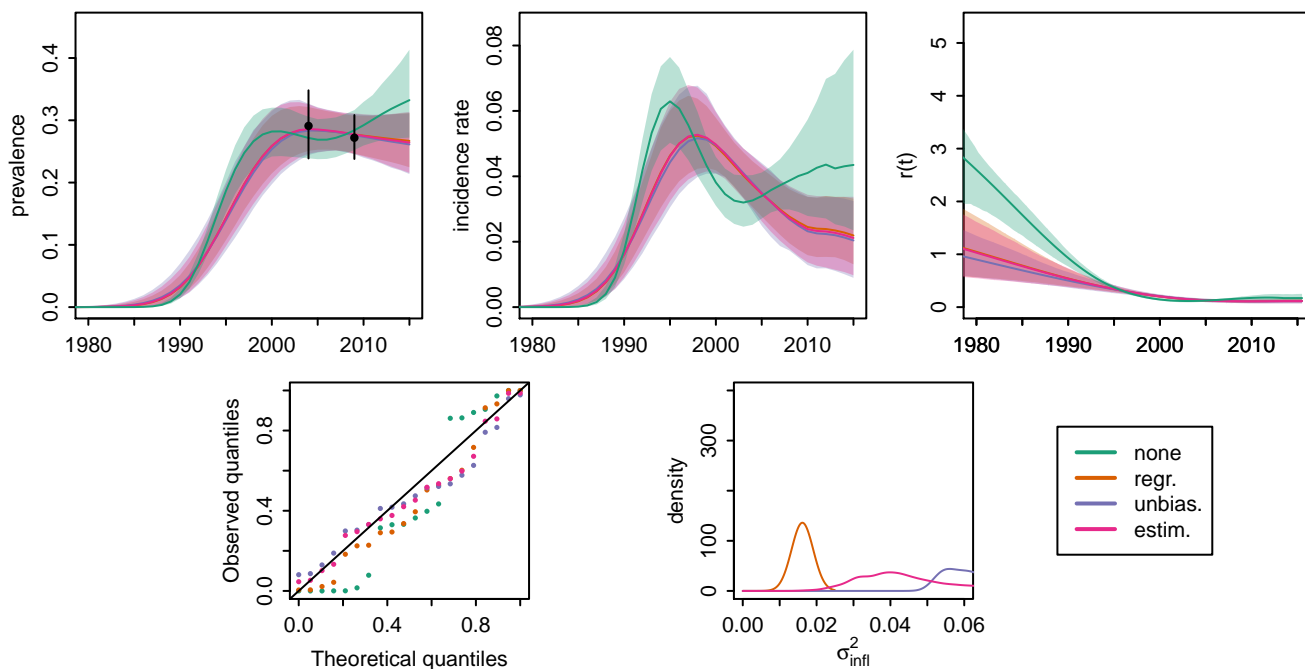

### r-spline, no equil. prior

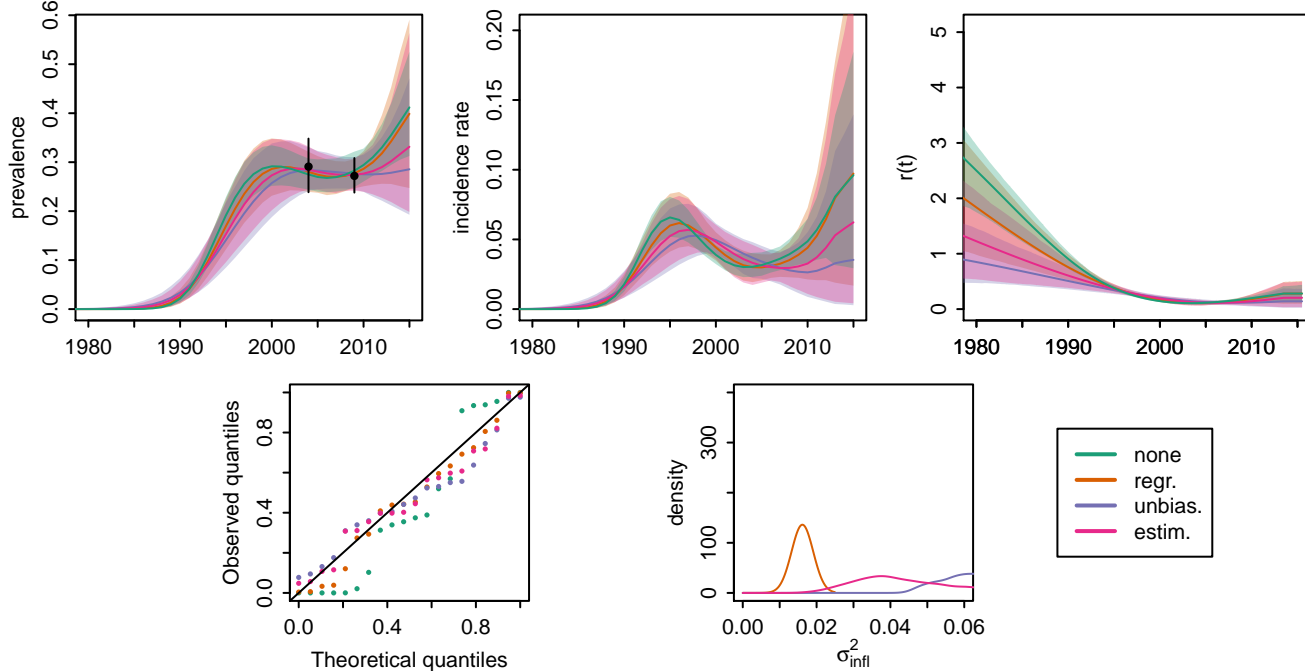

r-trend

# Lesotho Rural

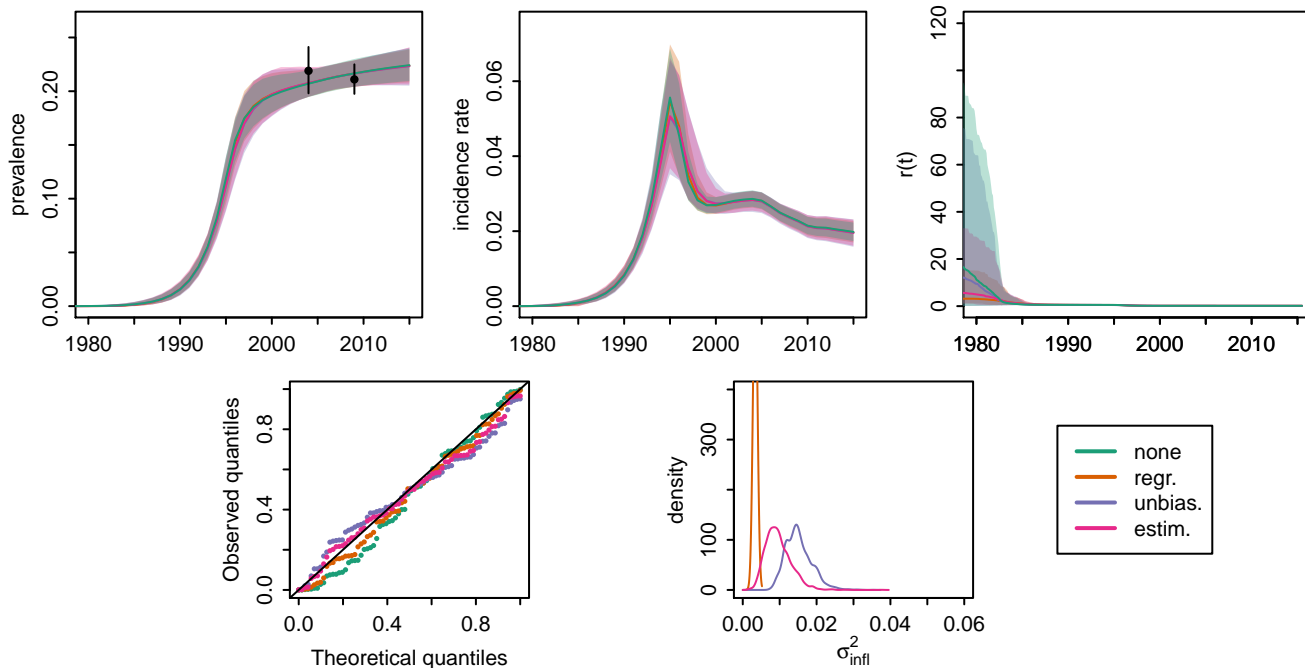

r-spline

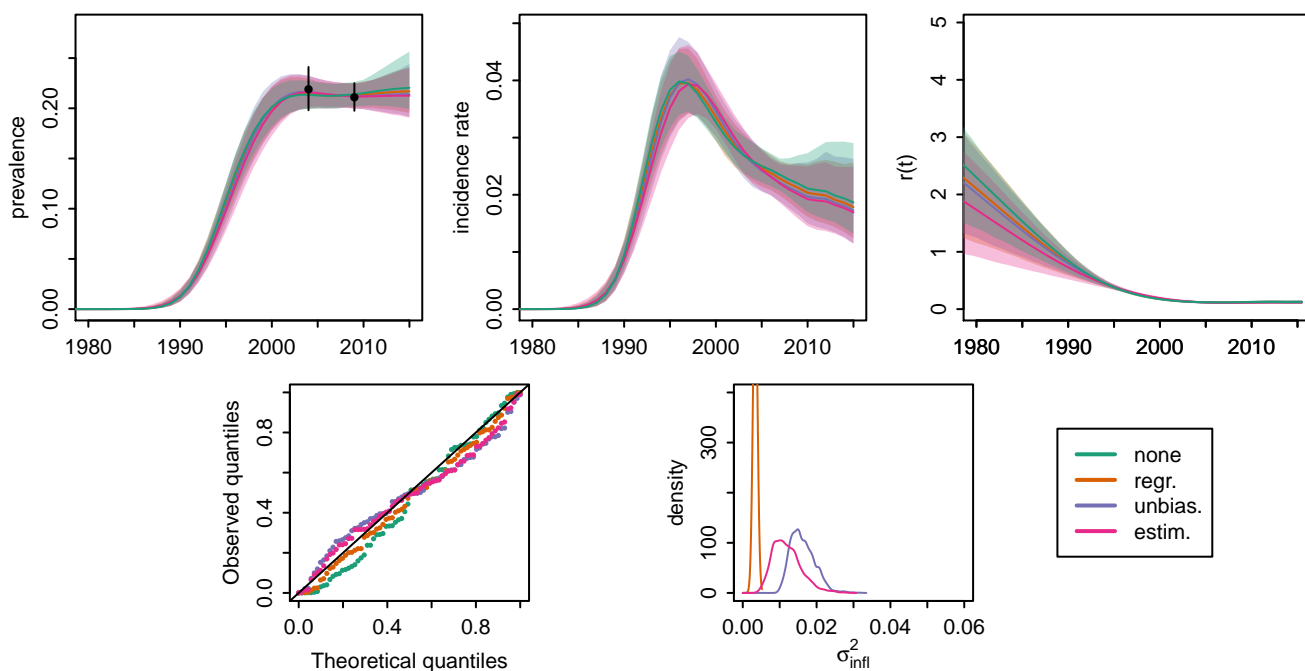

r-spline, no equil. prior

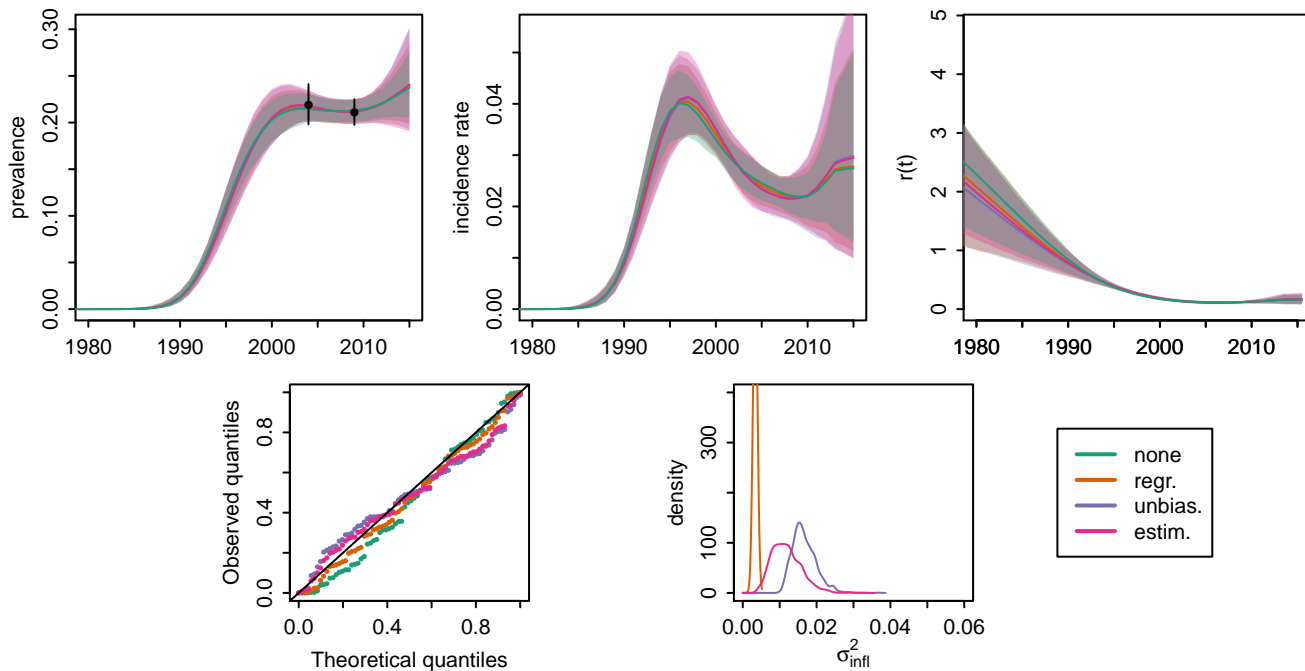

r-trend

# Malawi Northern Region

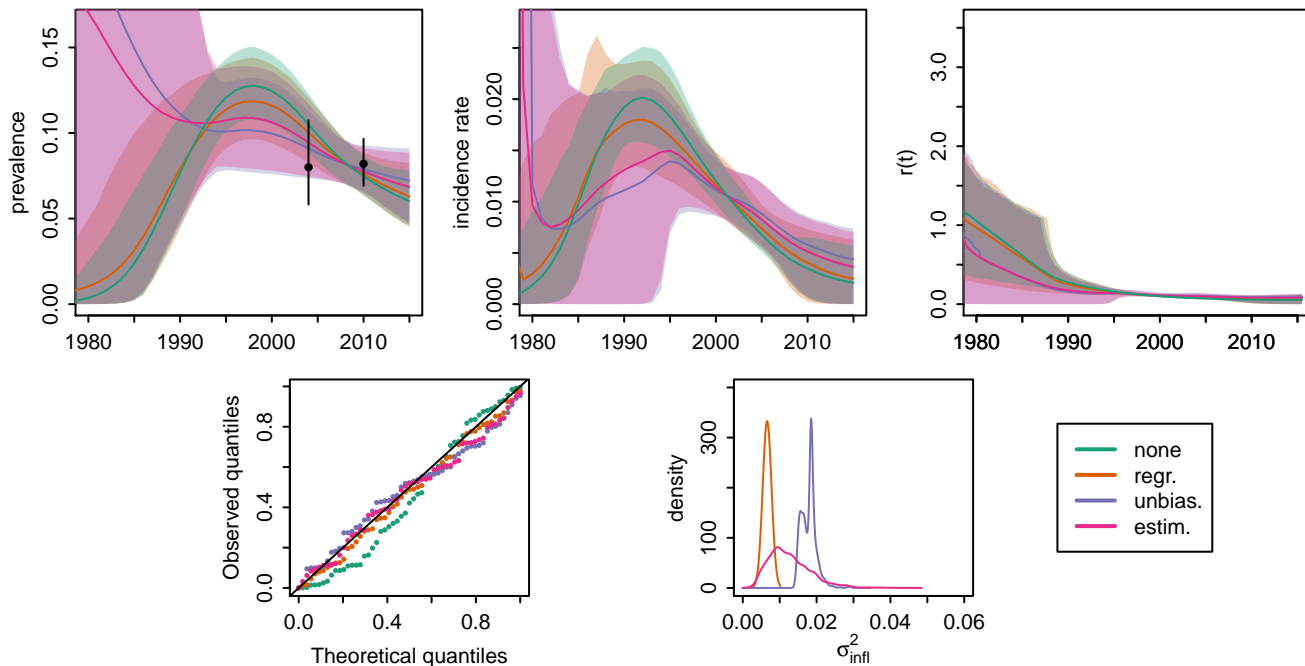

r-spline

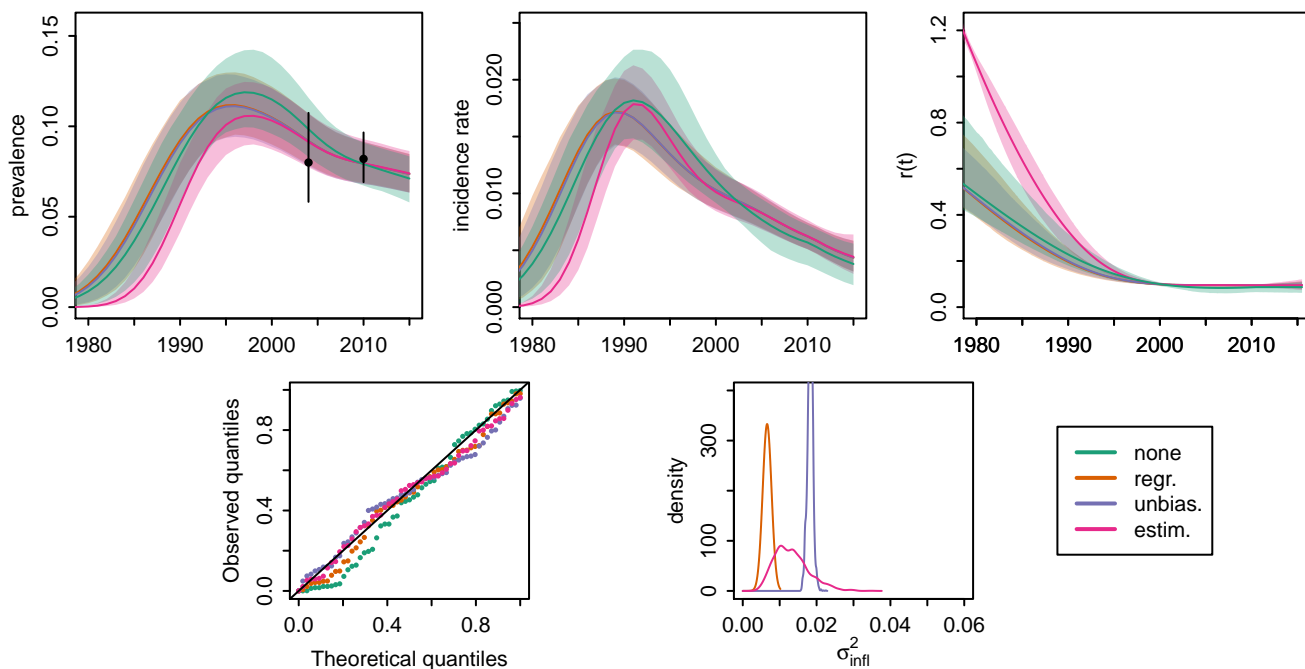

r-spline, no equil. prior

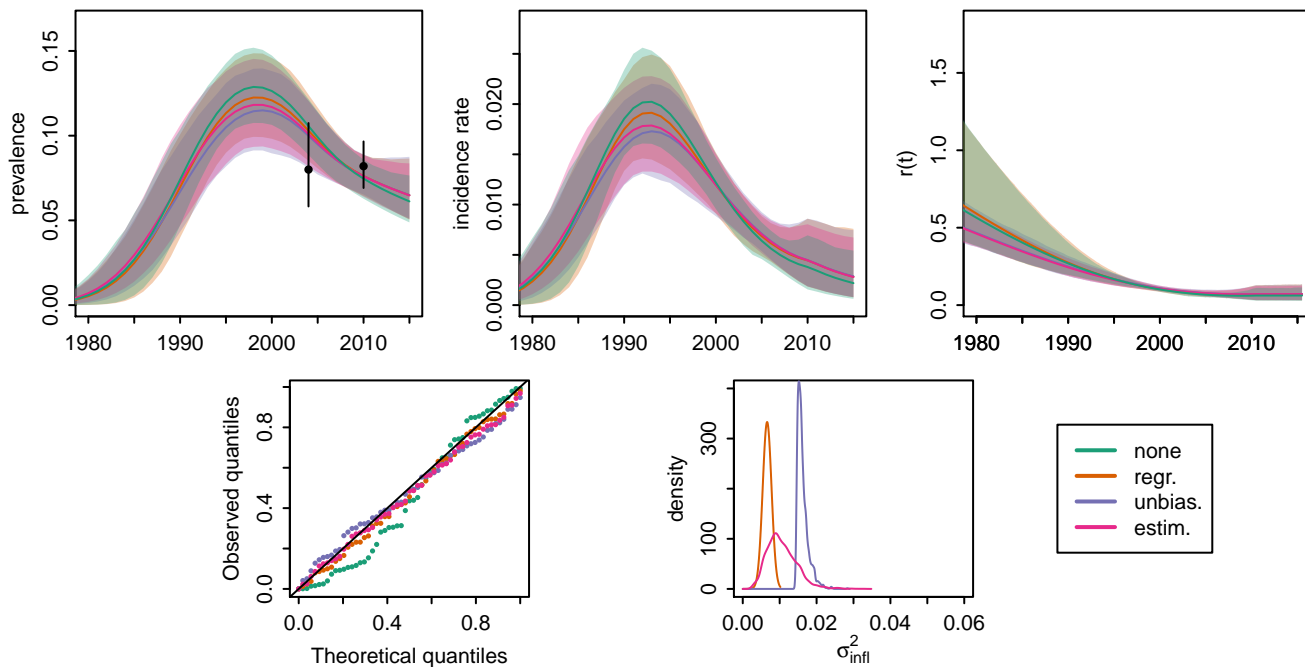

r-trend

# Malawi Central Region

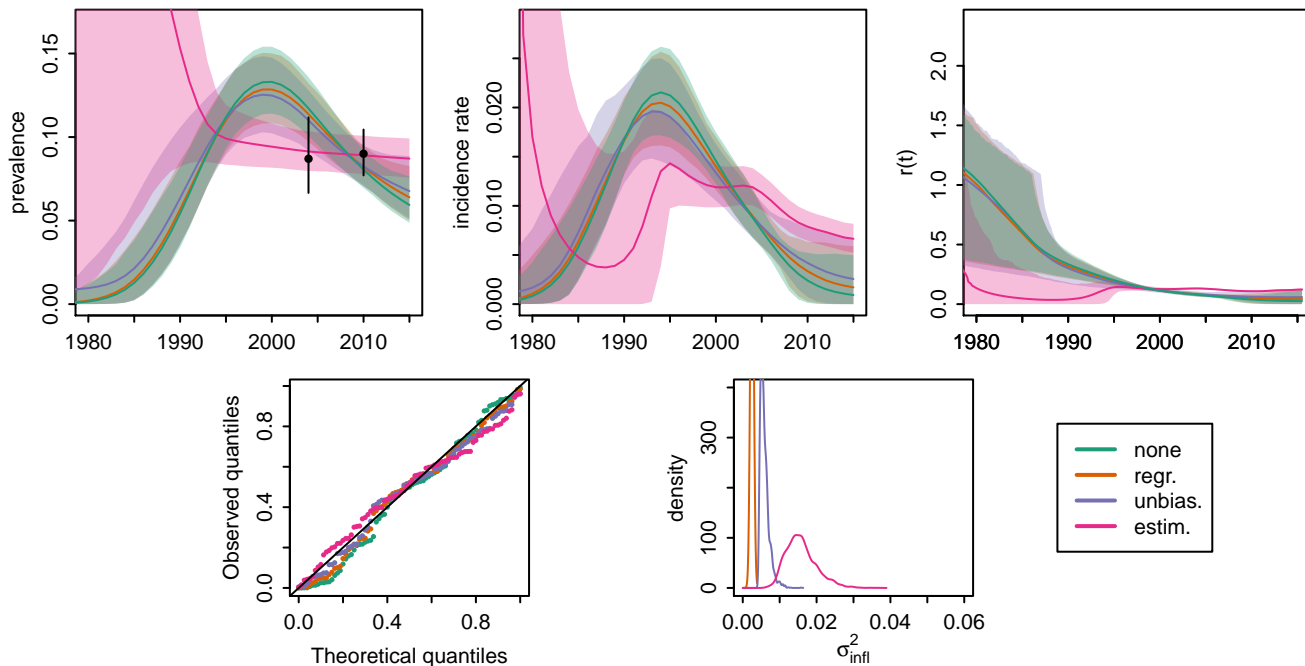

r-spline

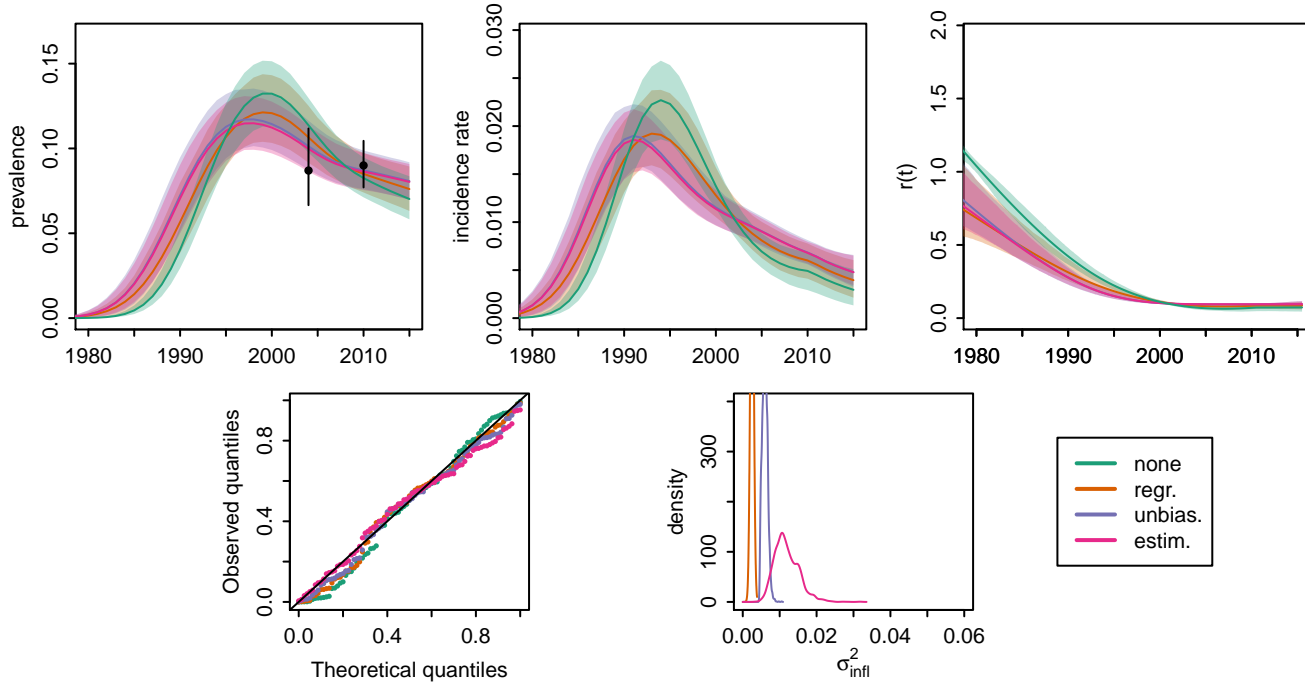

r-spline, no equil. prior

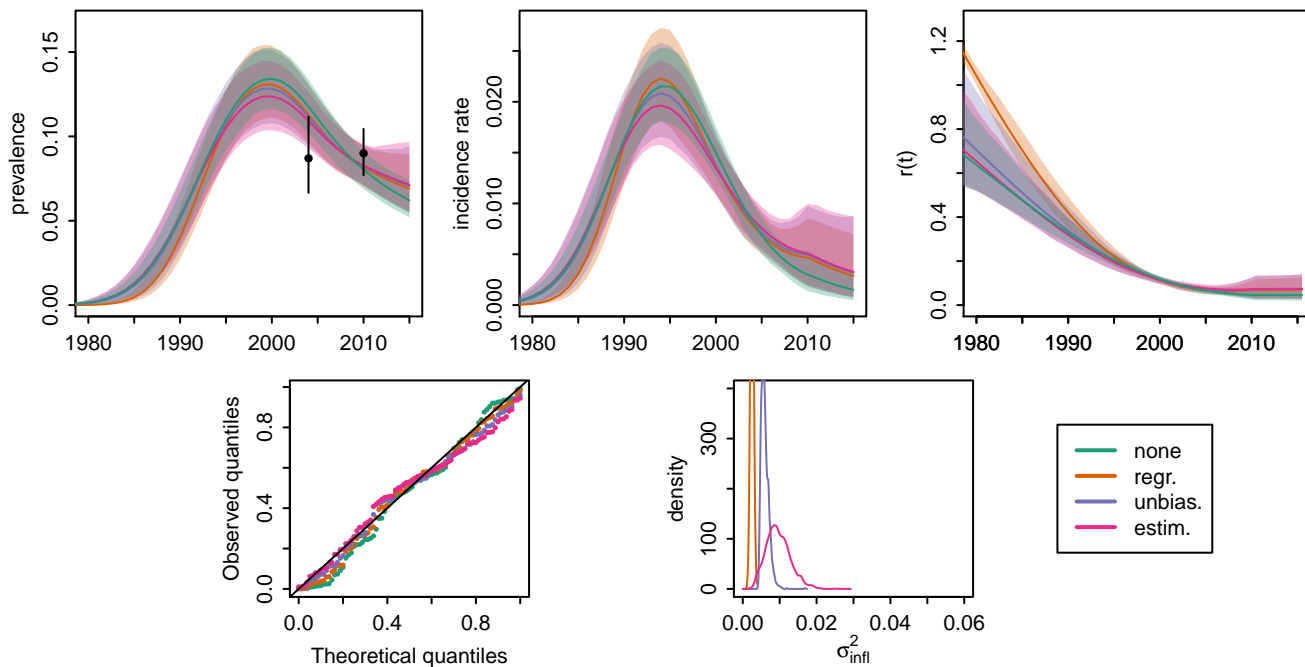

r-trend

### Malawi Southern Region

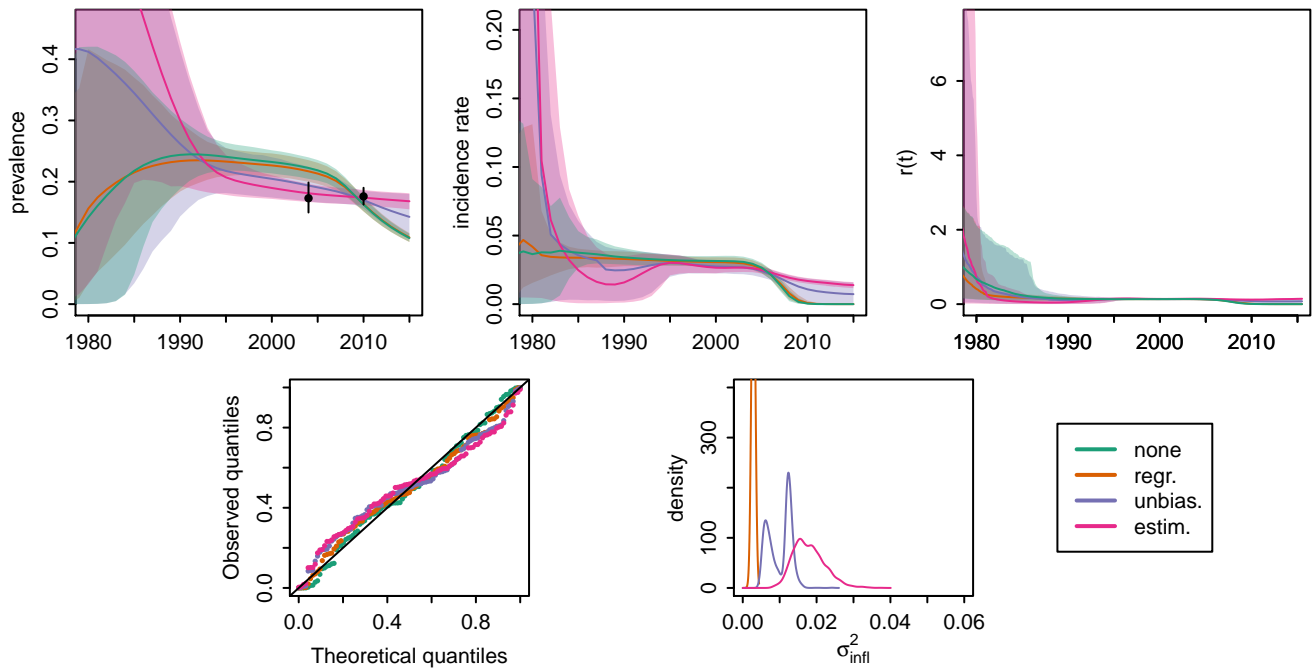

r-spline

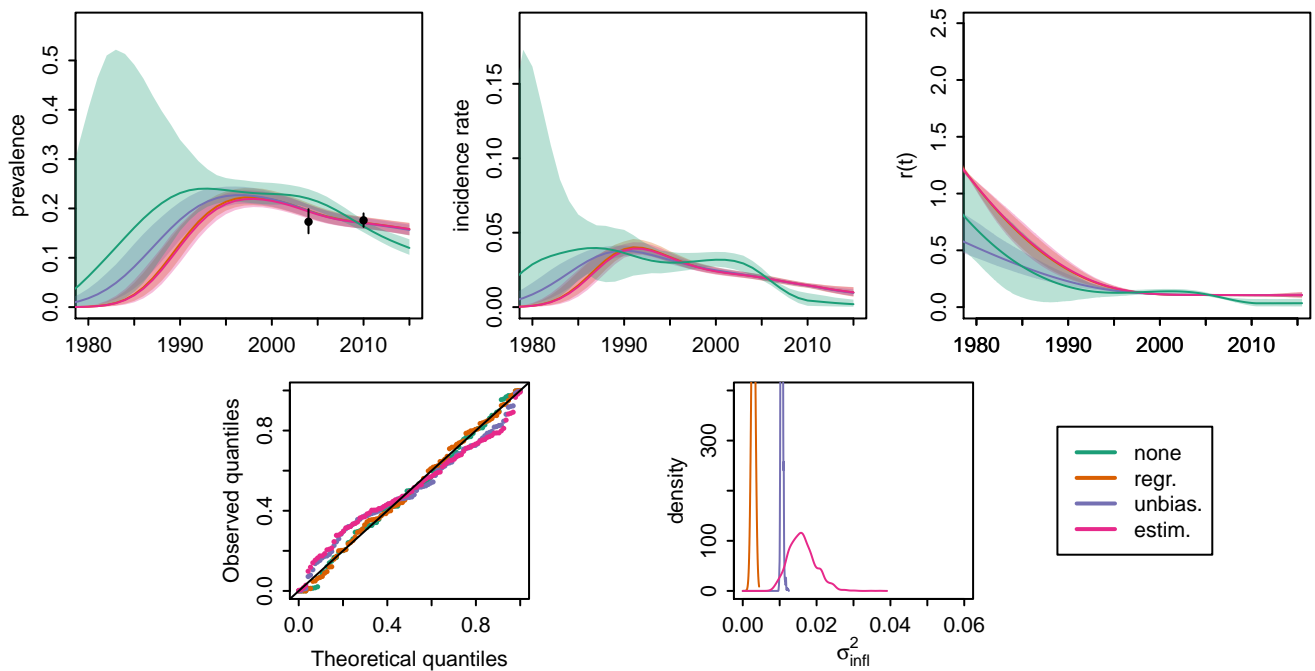

r-spline, no equil. prior

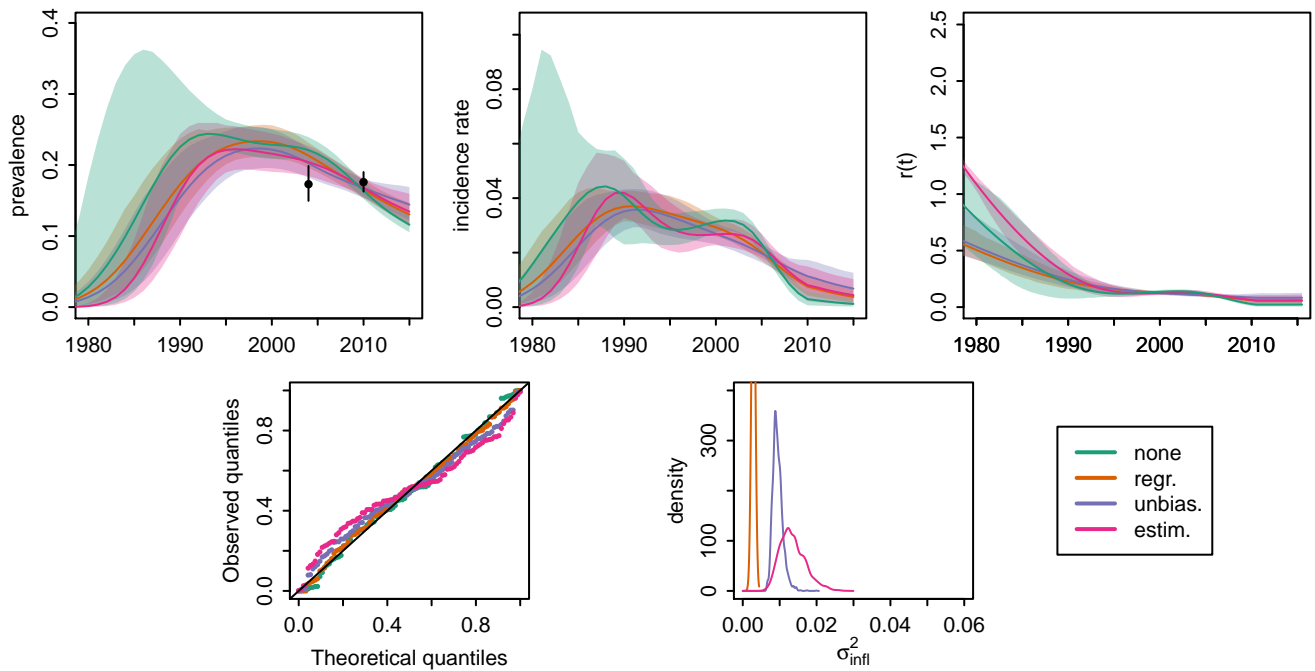

r-trend

# United Republic of Tanzania Urban

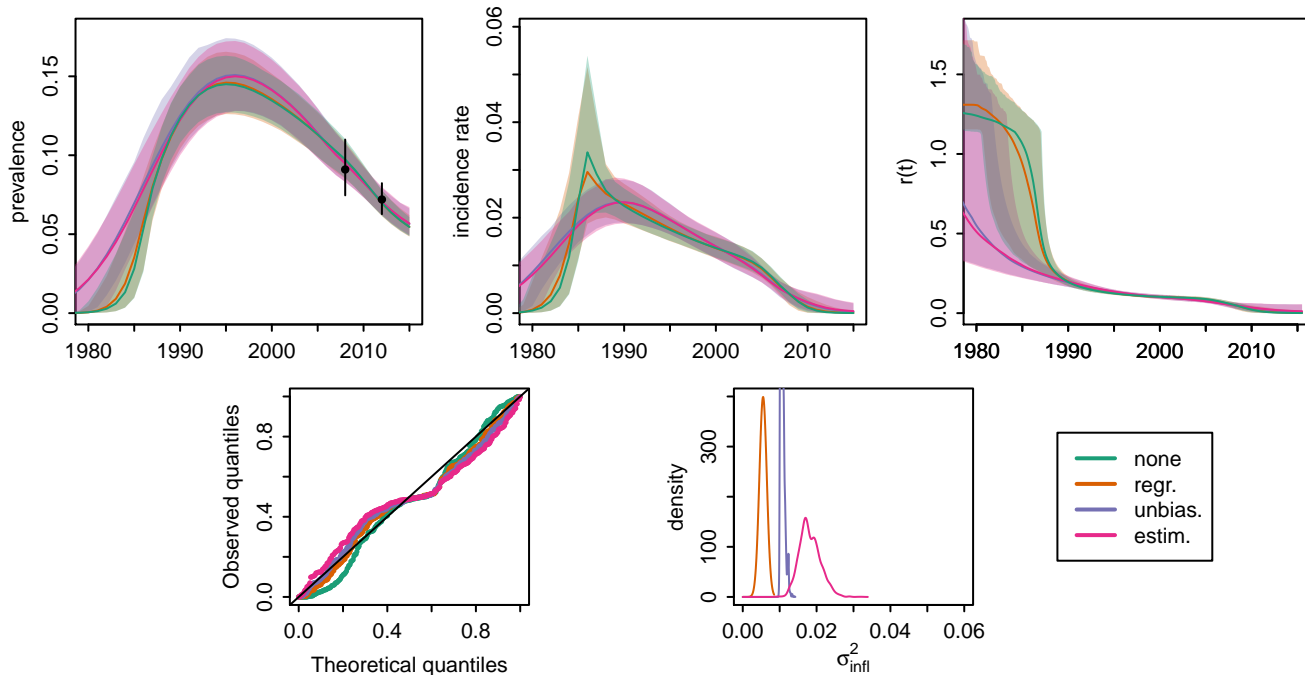

r-spline

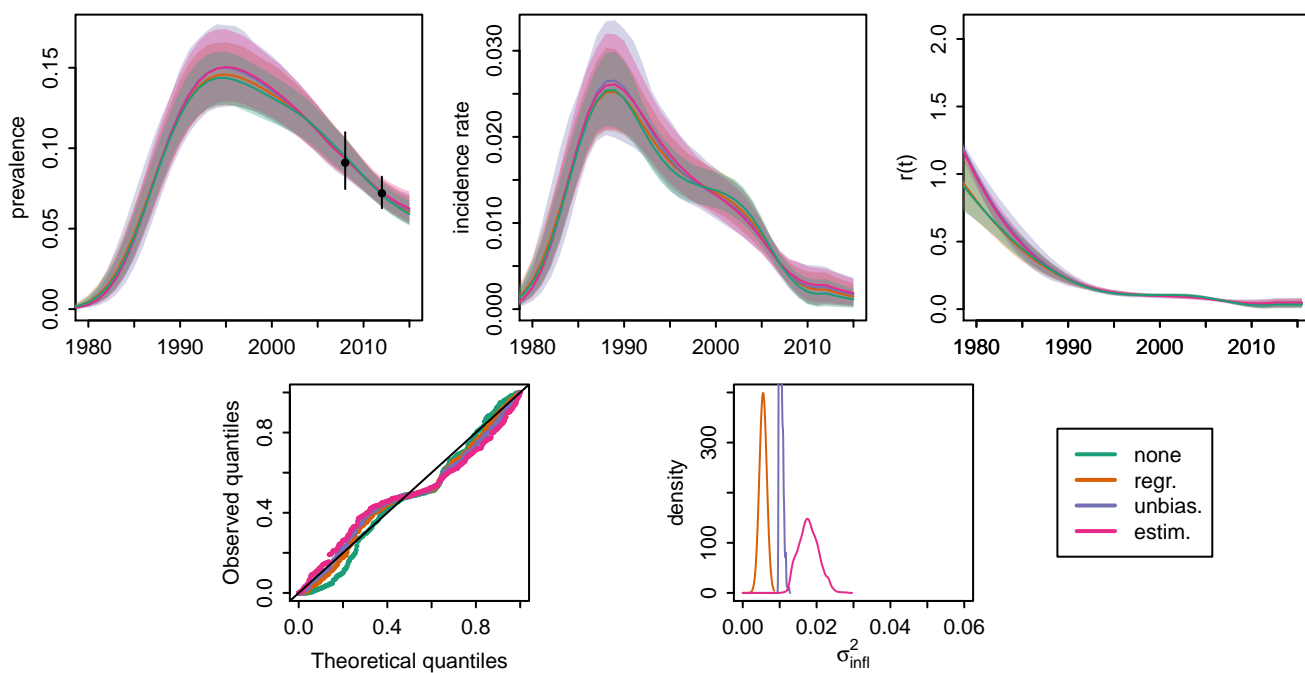

r-spline, no equil. prior

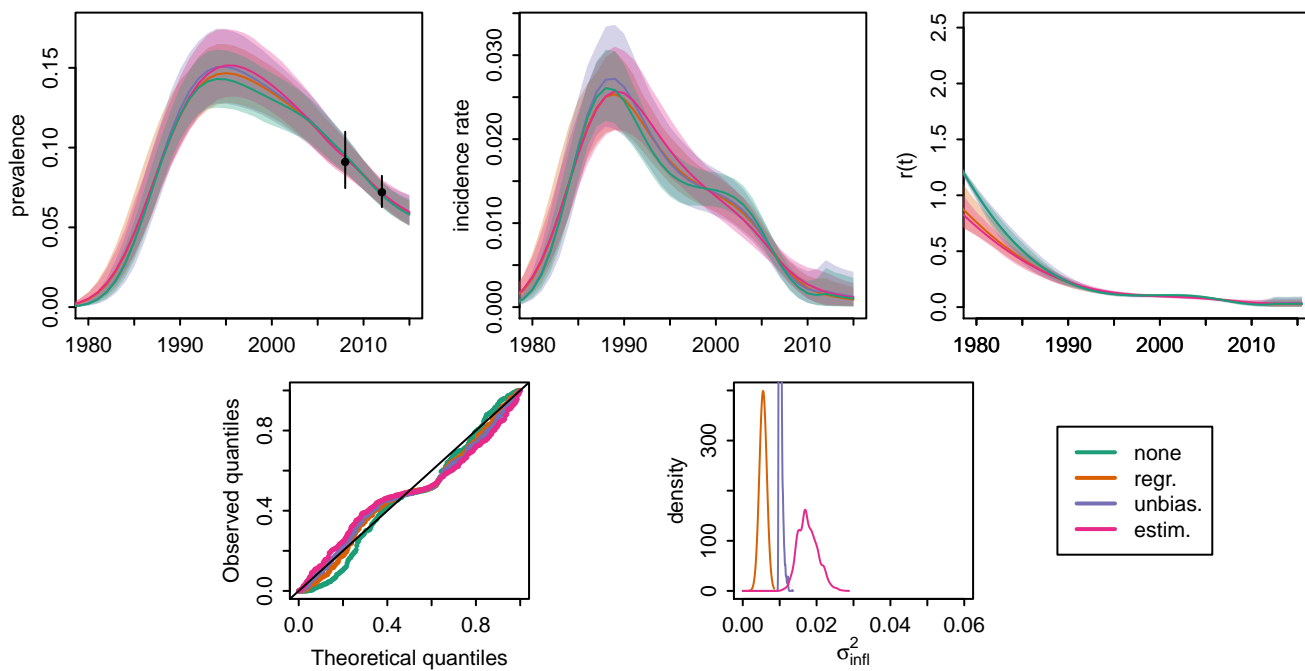



r-trend

# United Republic of Tanzania Rural

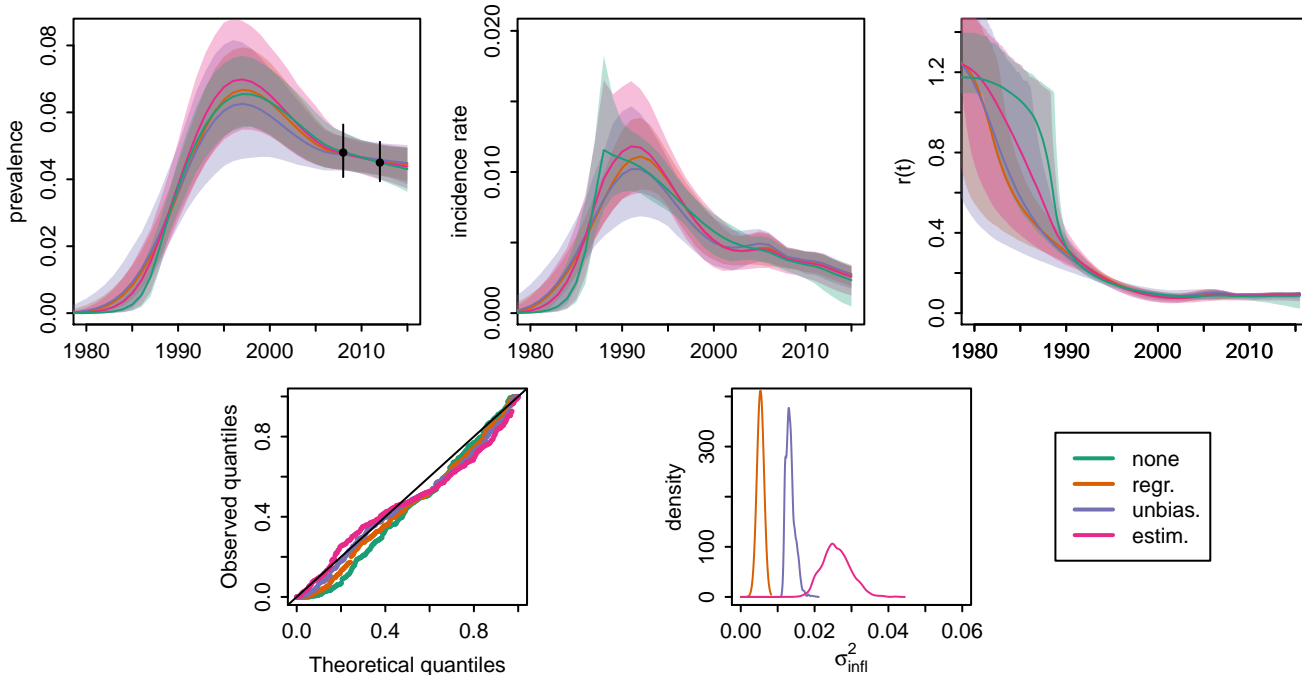

r-spline

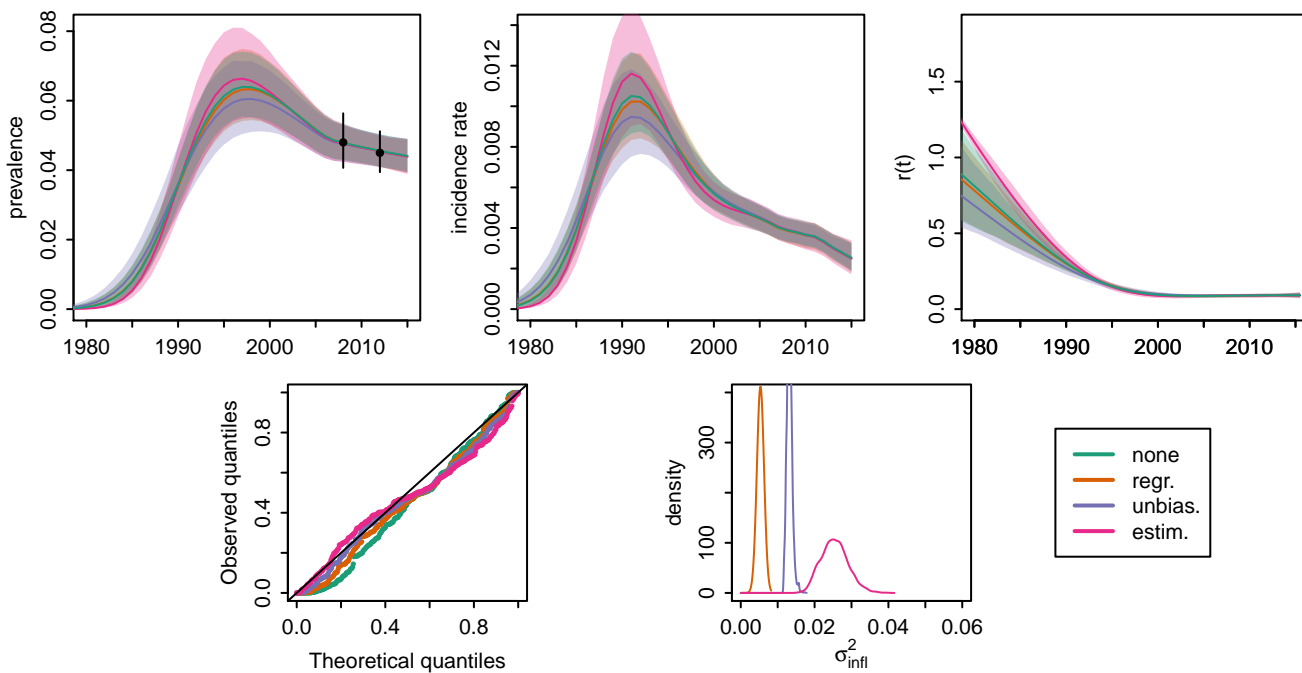

r-spline, no equil. prior

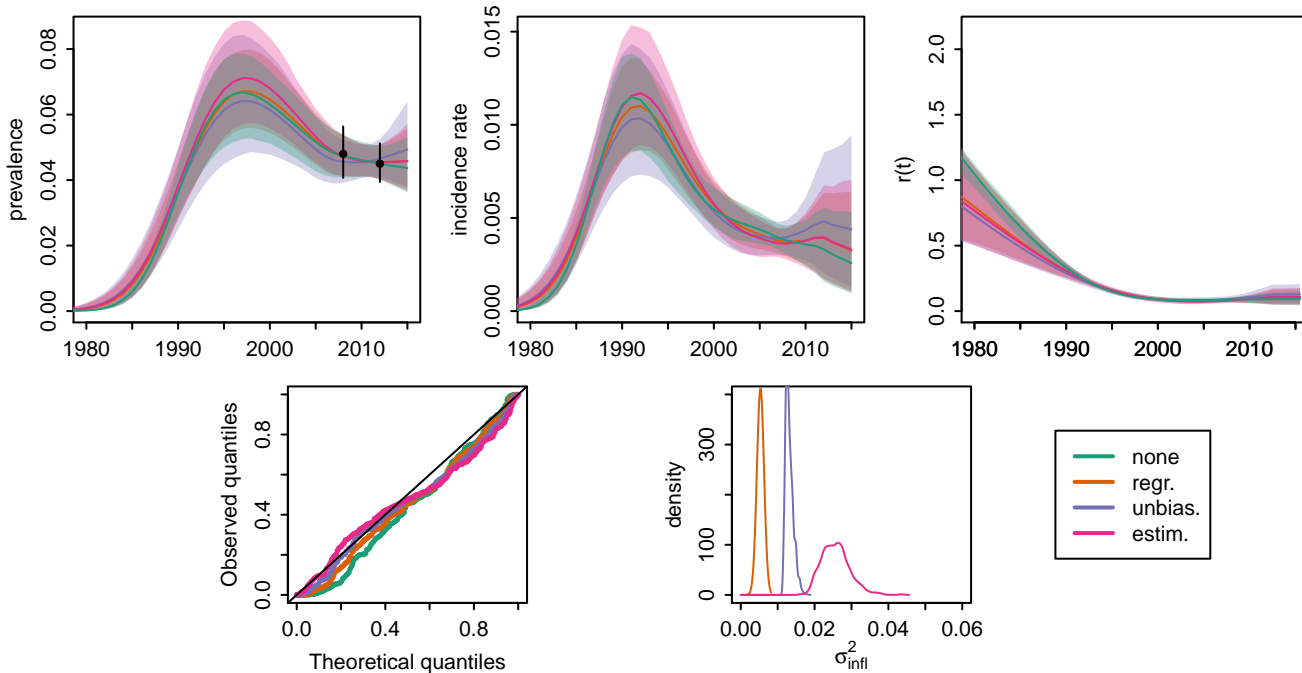

r-trend

# Uganda Urban

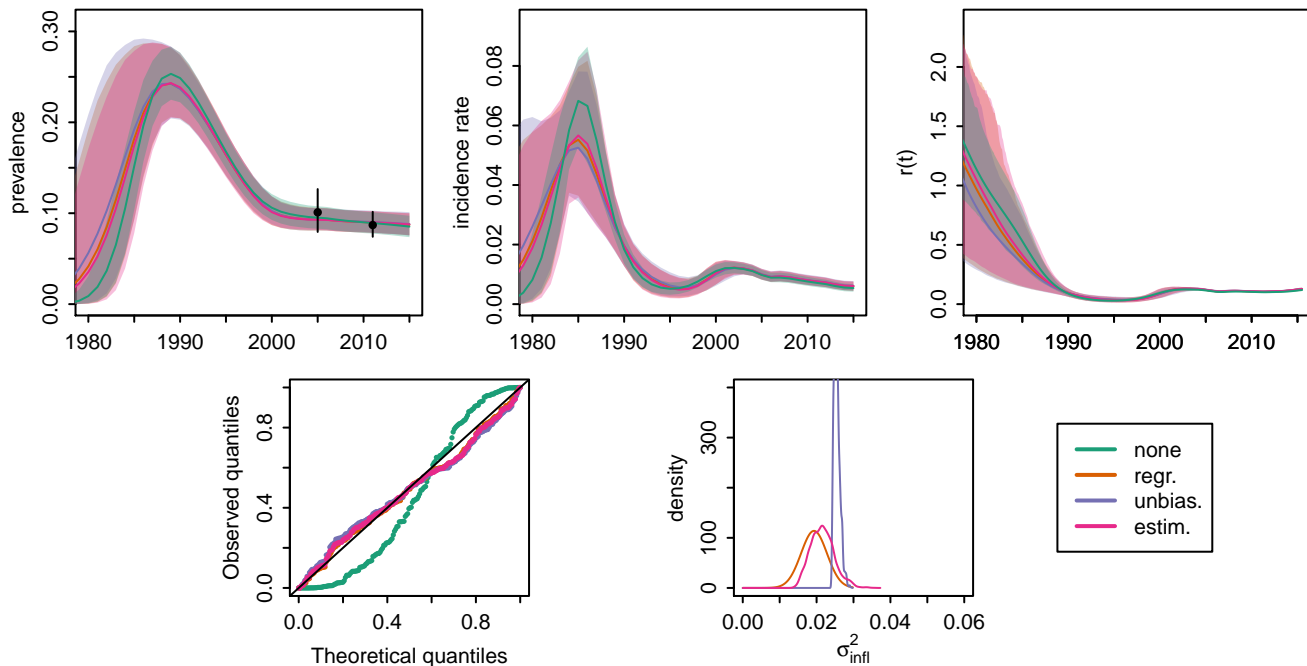

r-spline

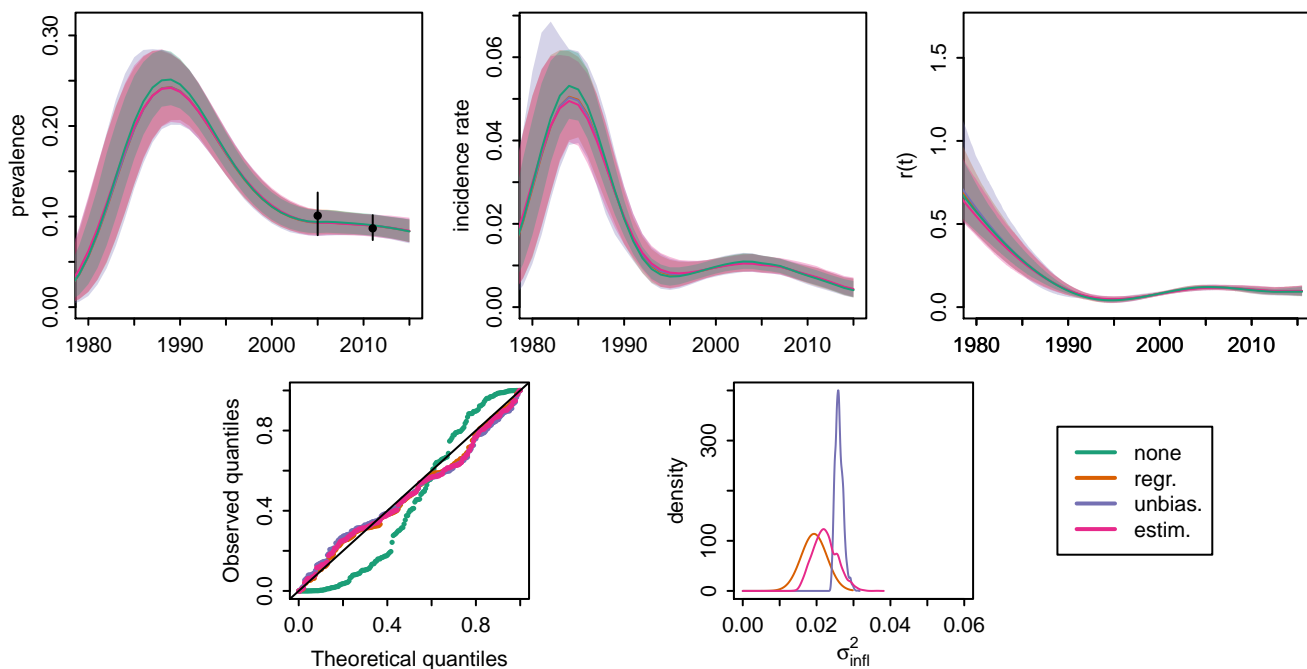

r-spline, no equil. prior

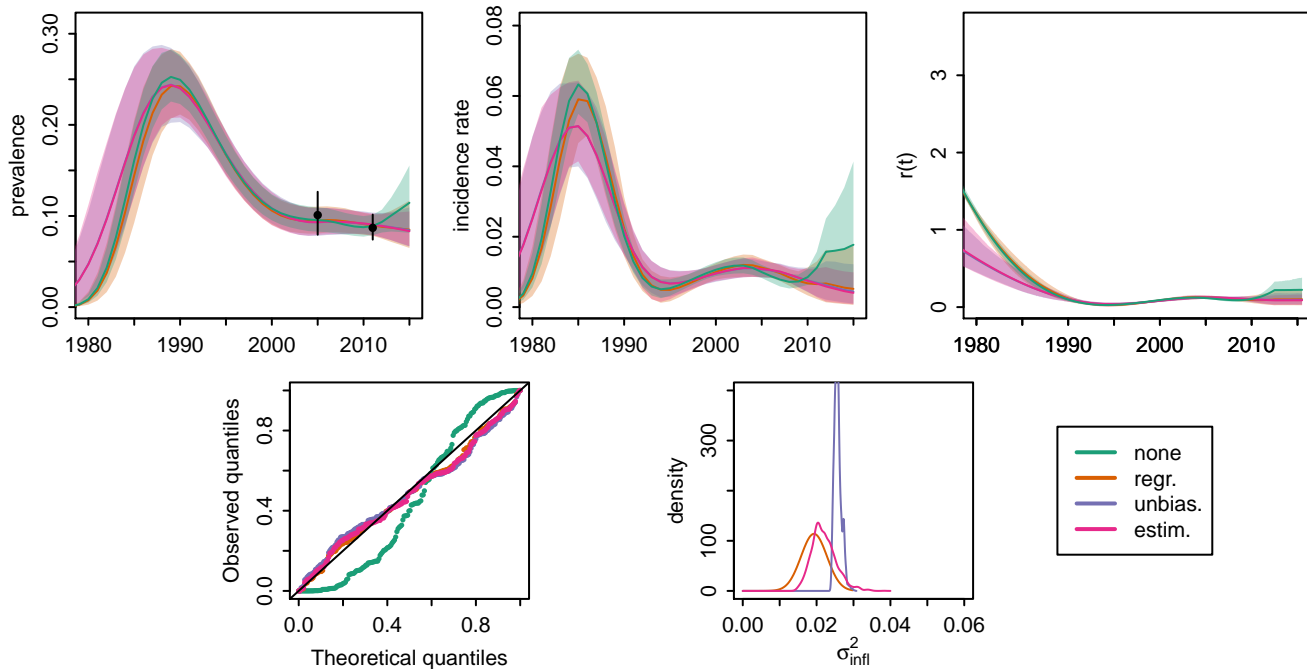

### r-trend

### Uganda Rural

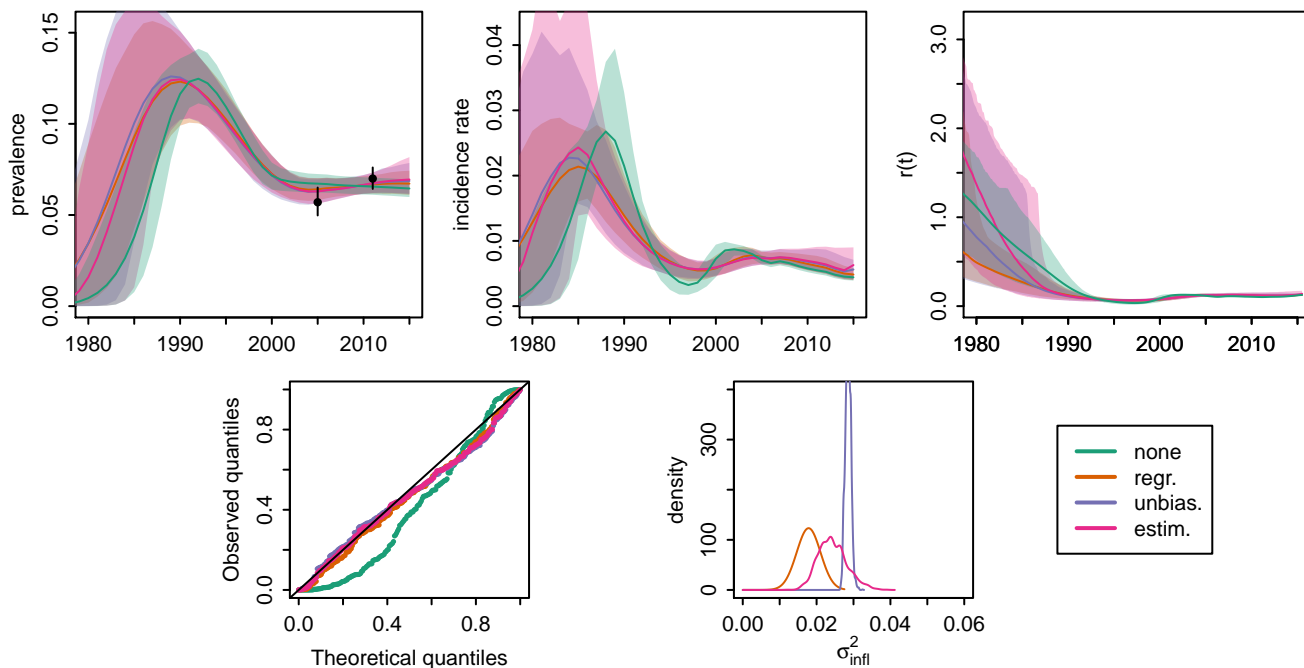

### r-spline

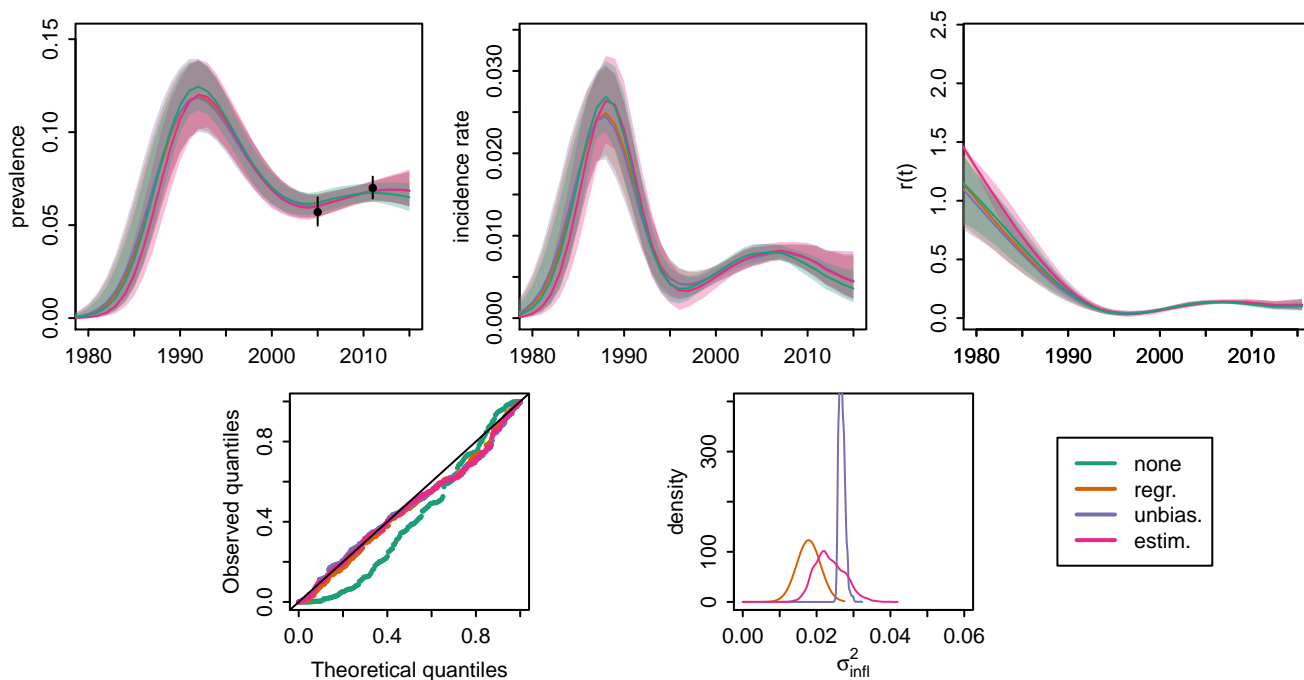

### r-spline, no equil. prior

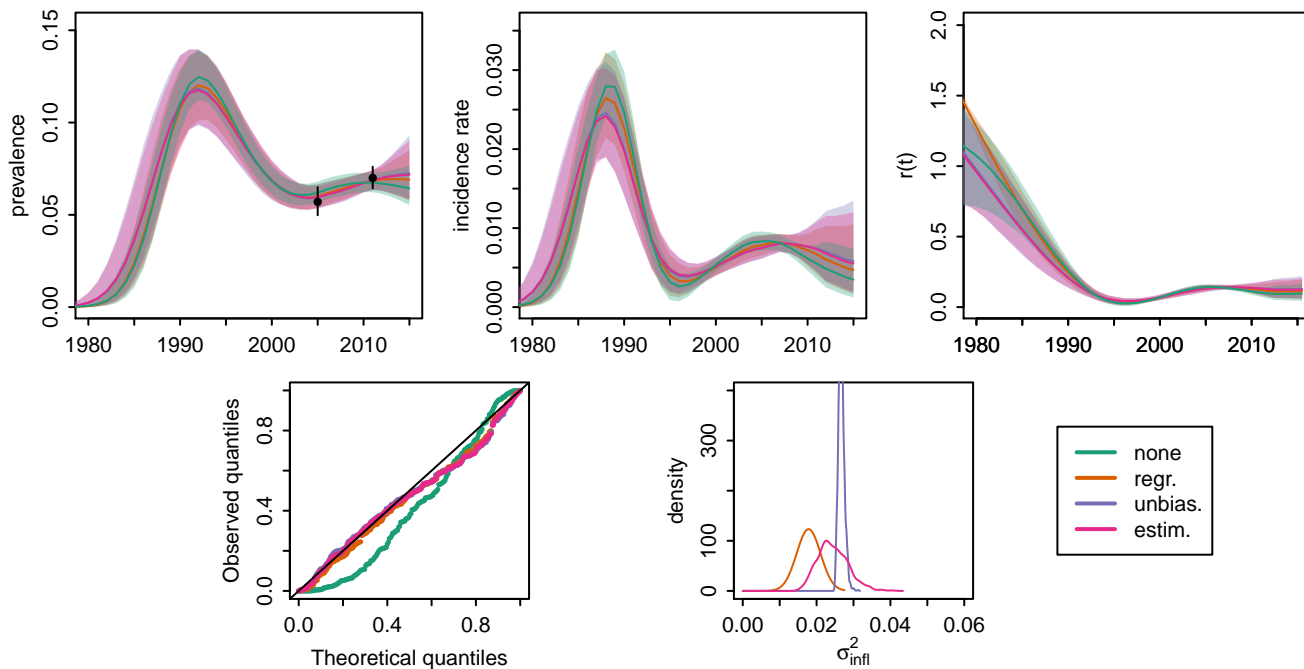

# South Africa MP

## r-trend

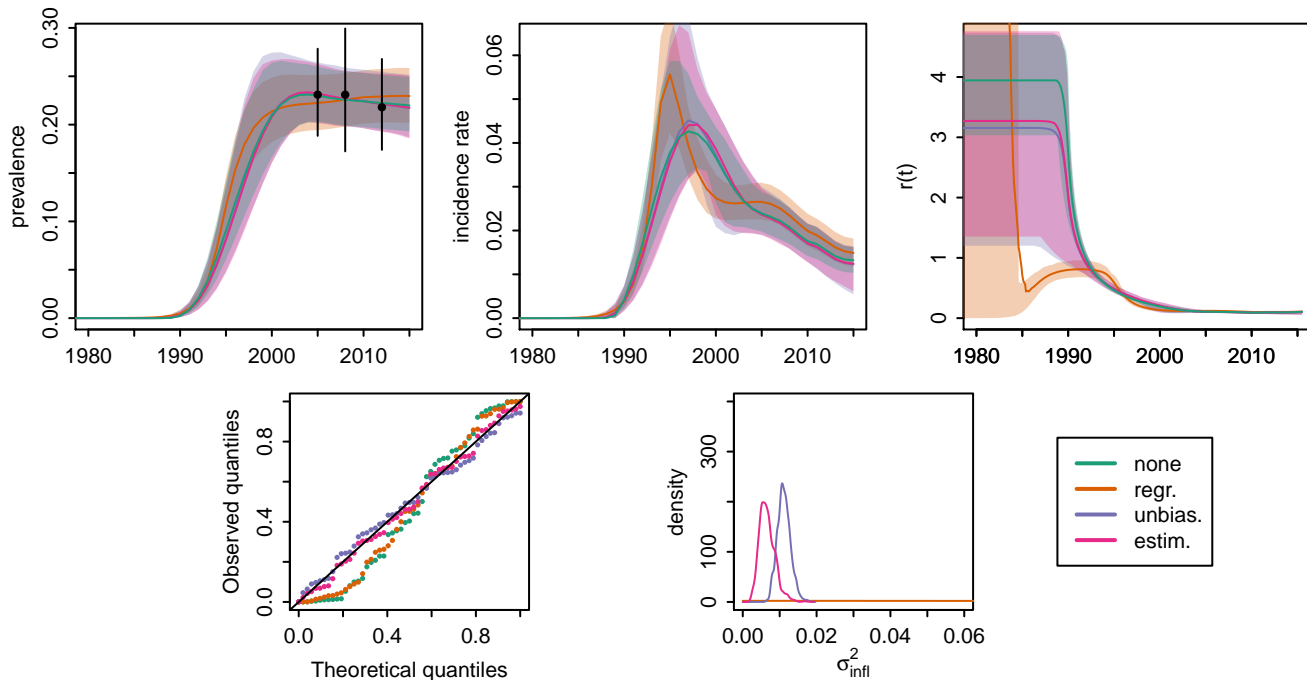

## r-spline

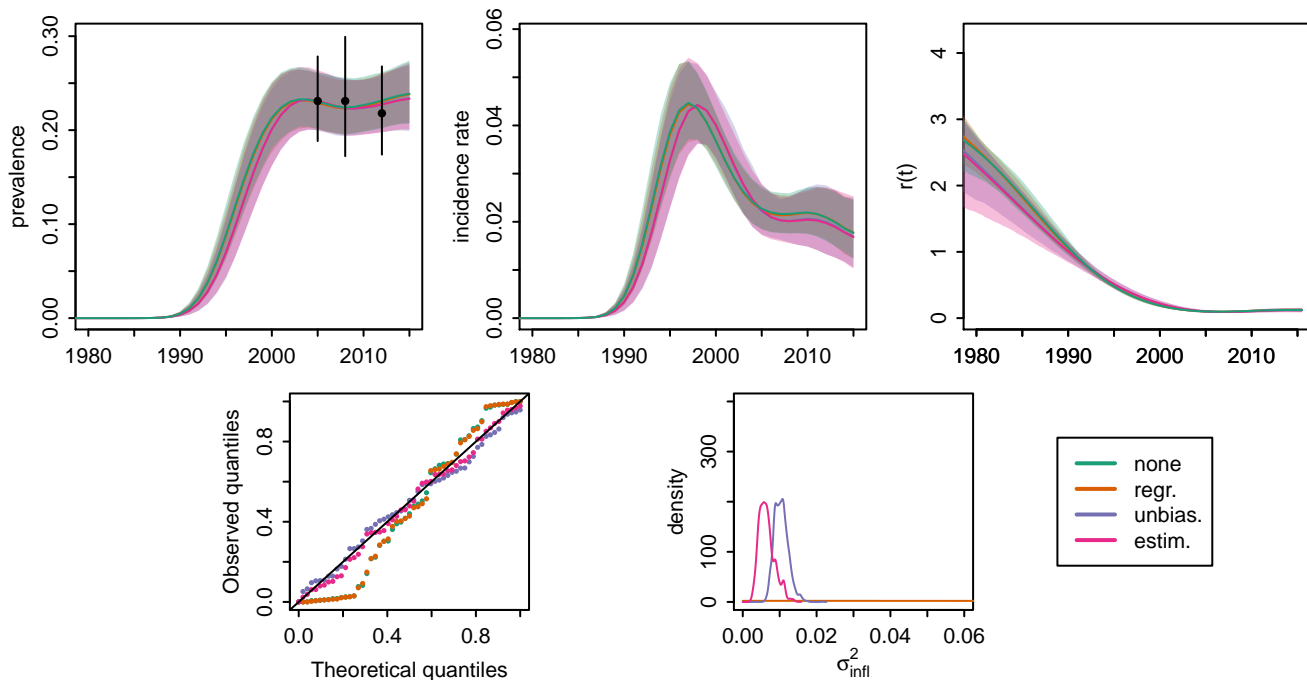

## r-spline, no equil. prior

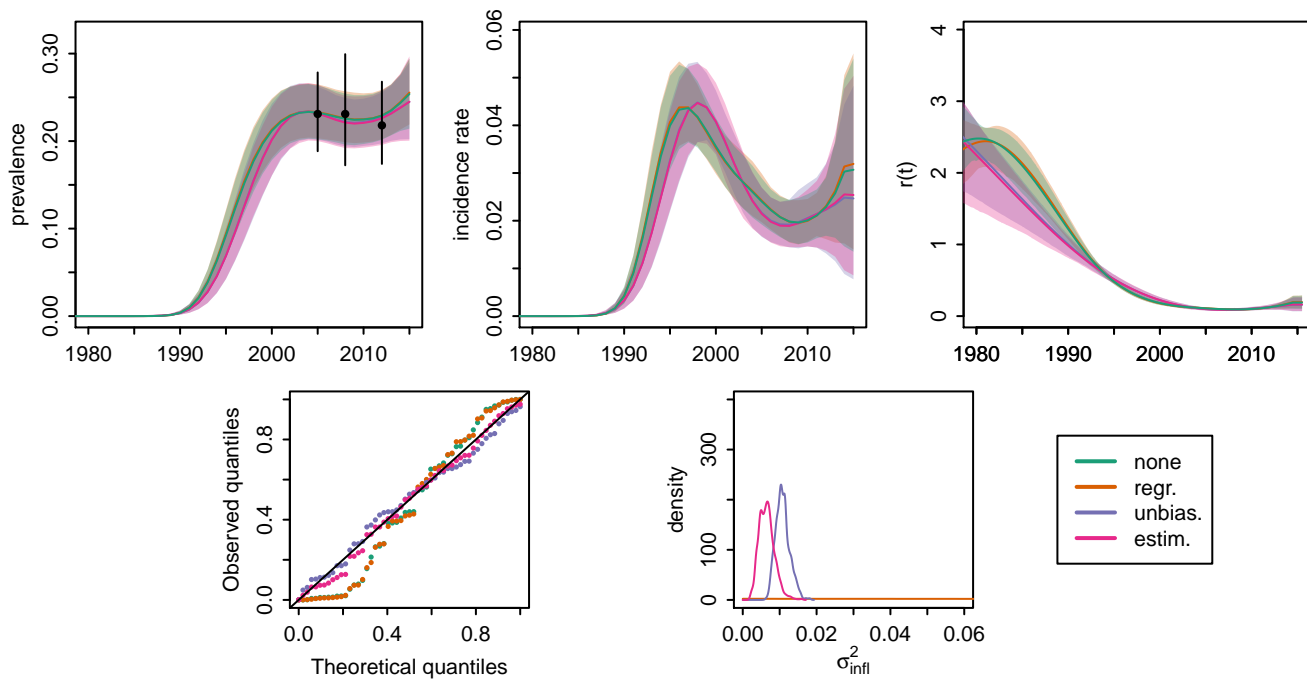

r-trend

### South Africa GP

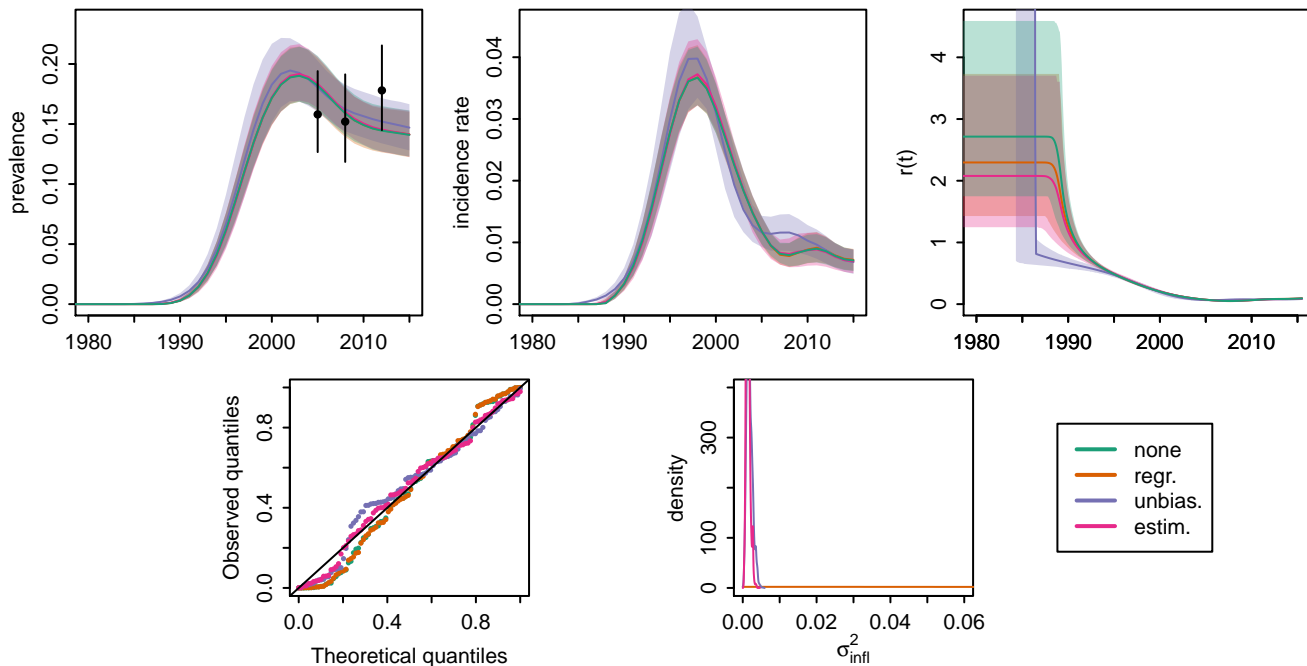

r-spline

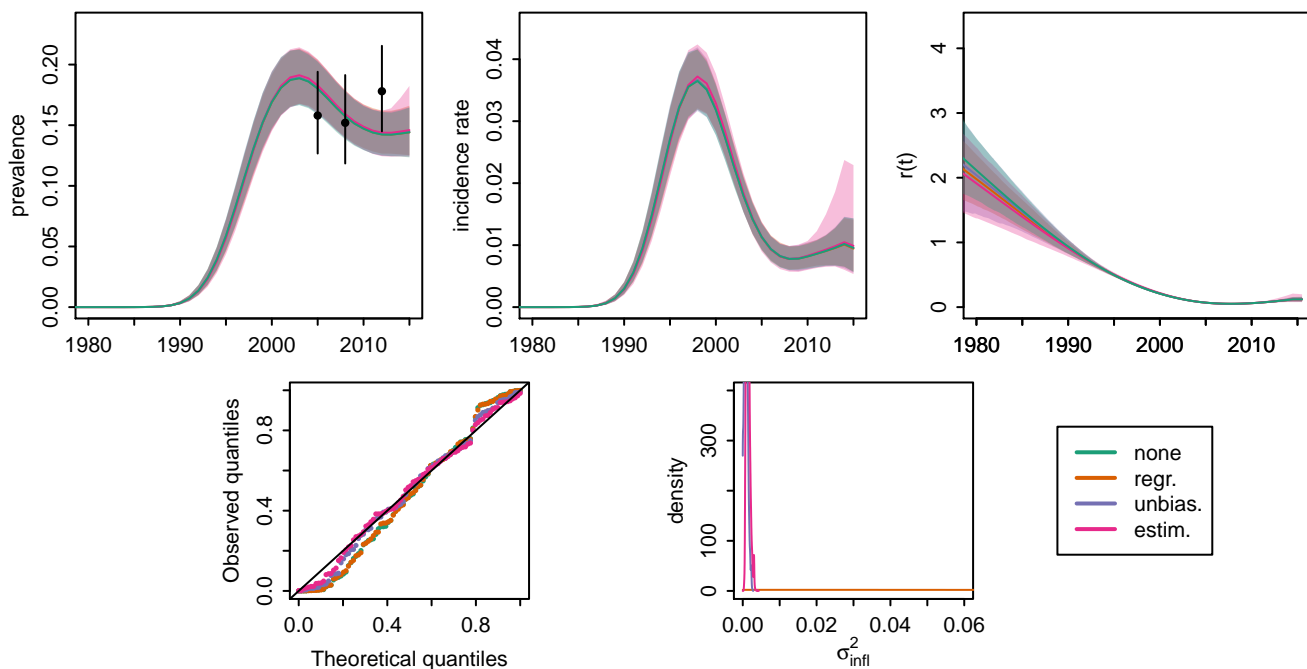

r-spline, no equil. prior

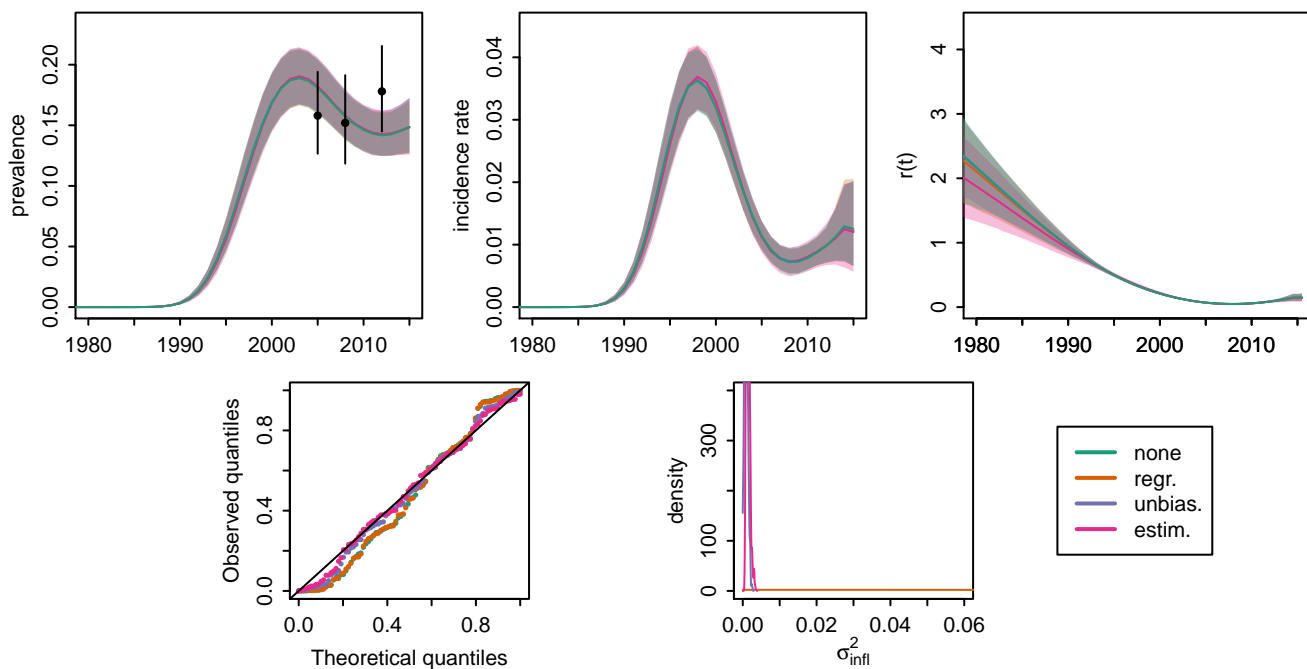

### r-trend

### South Africa KZN

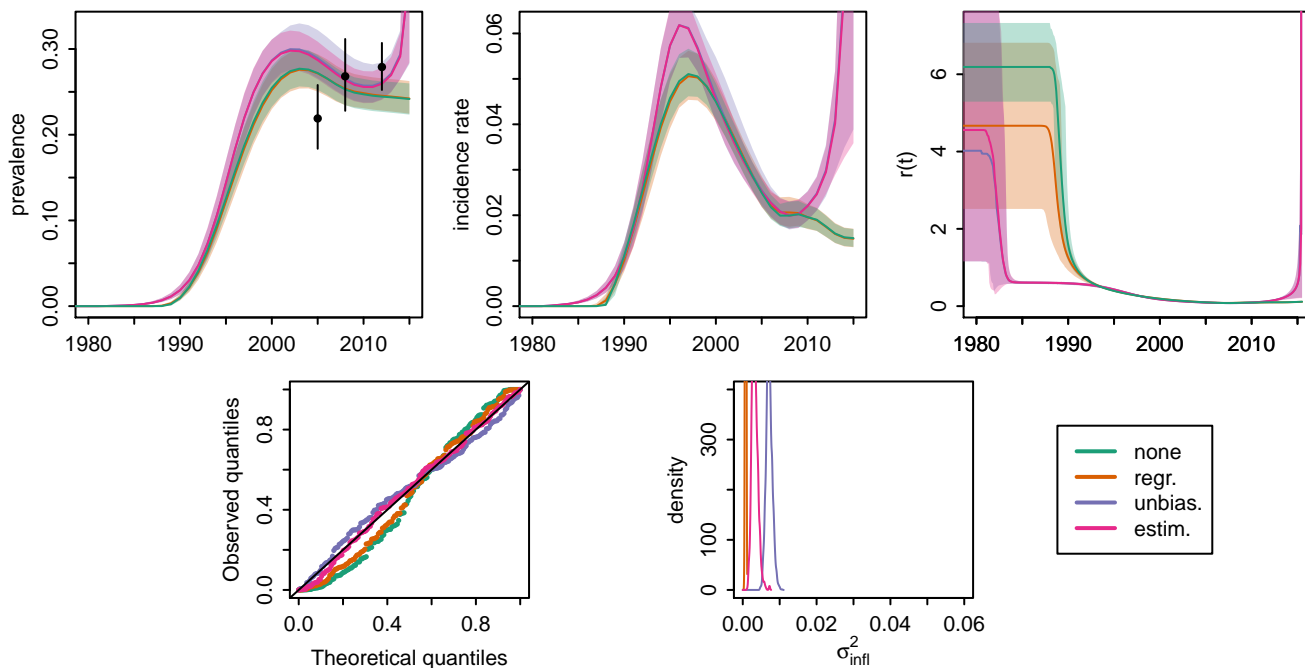

### r-spline

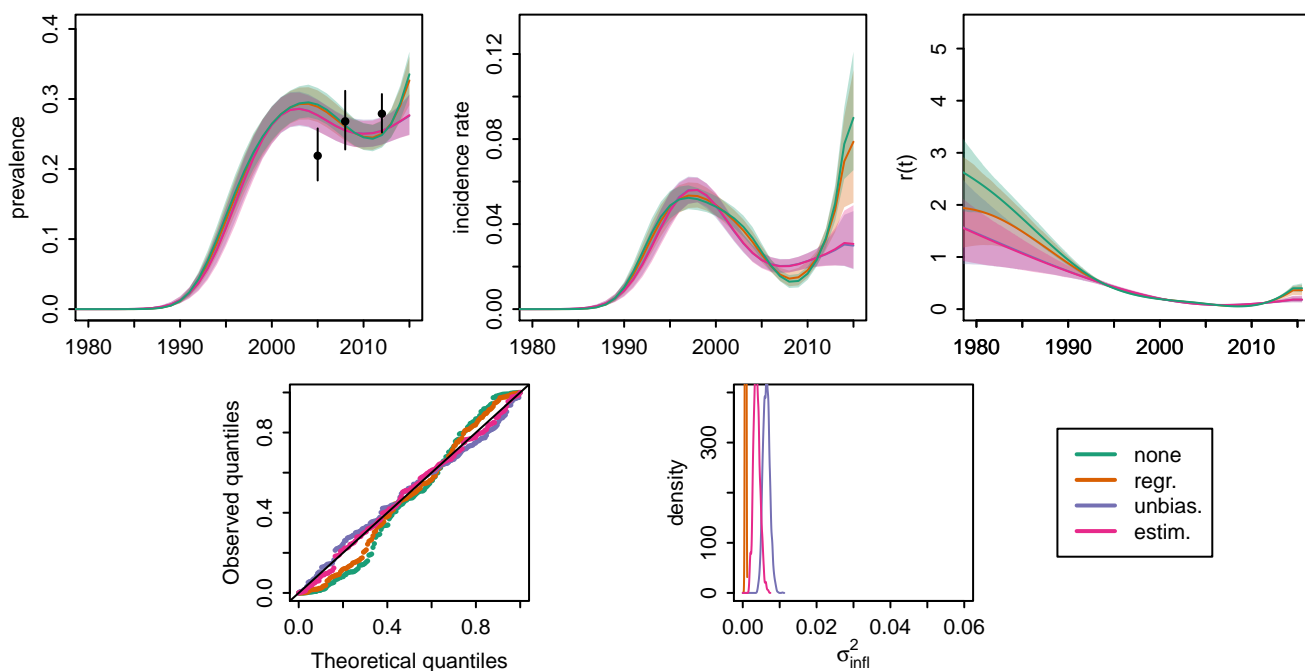

### r-spline, no equil. prior

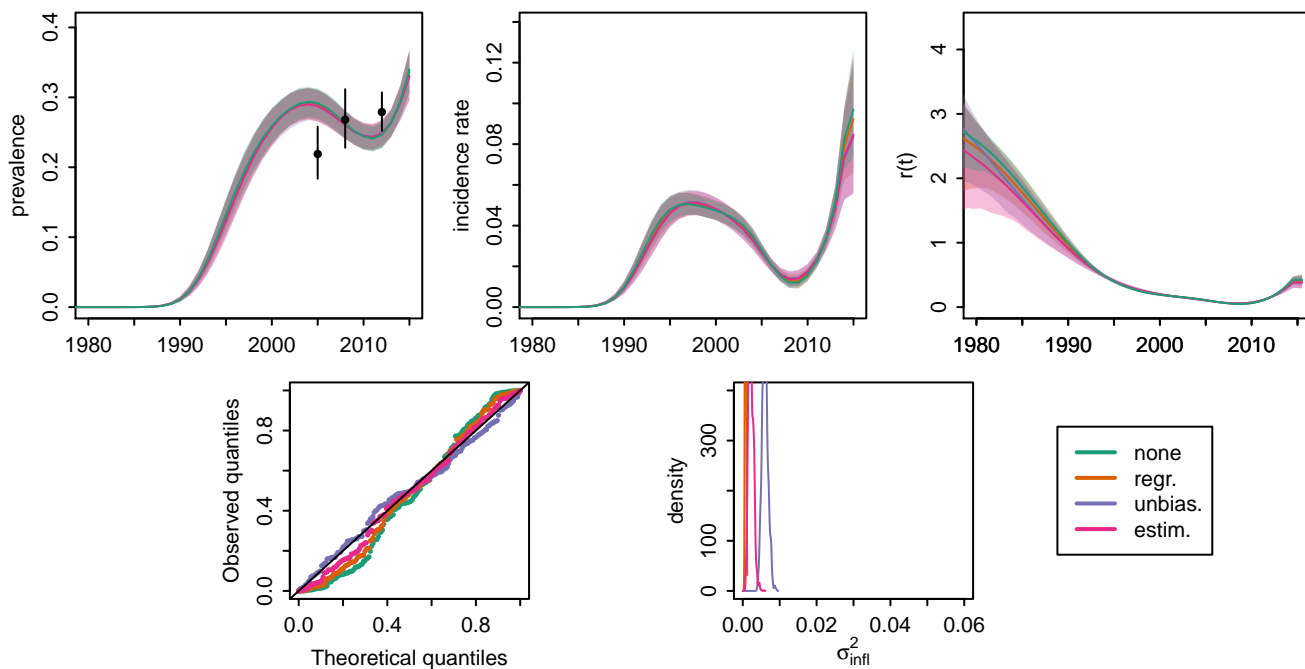

r-trend

### South Africa WC

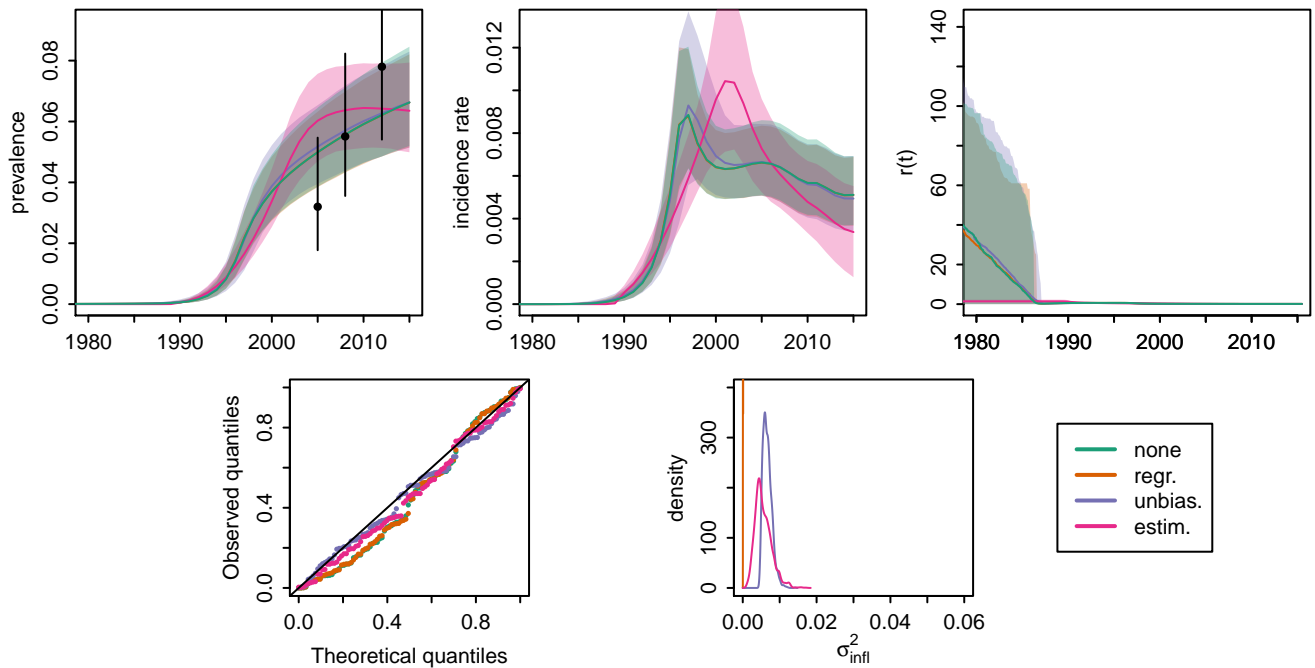

r-spline

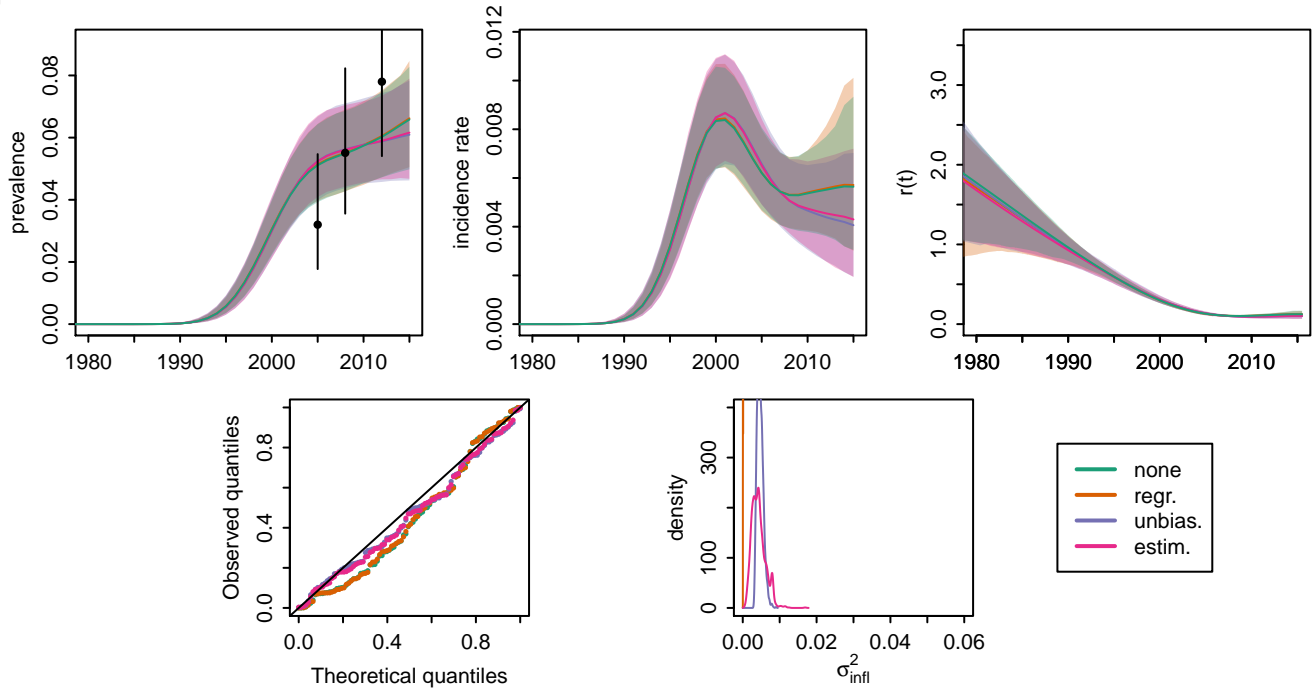

r-spline, no equil. prior

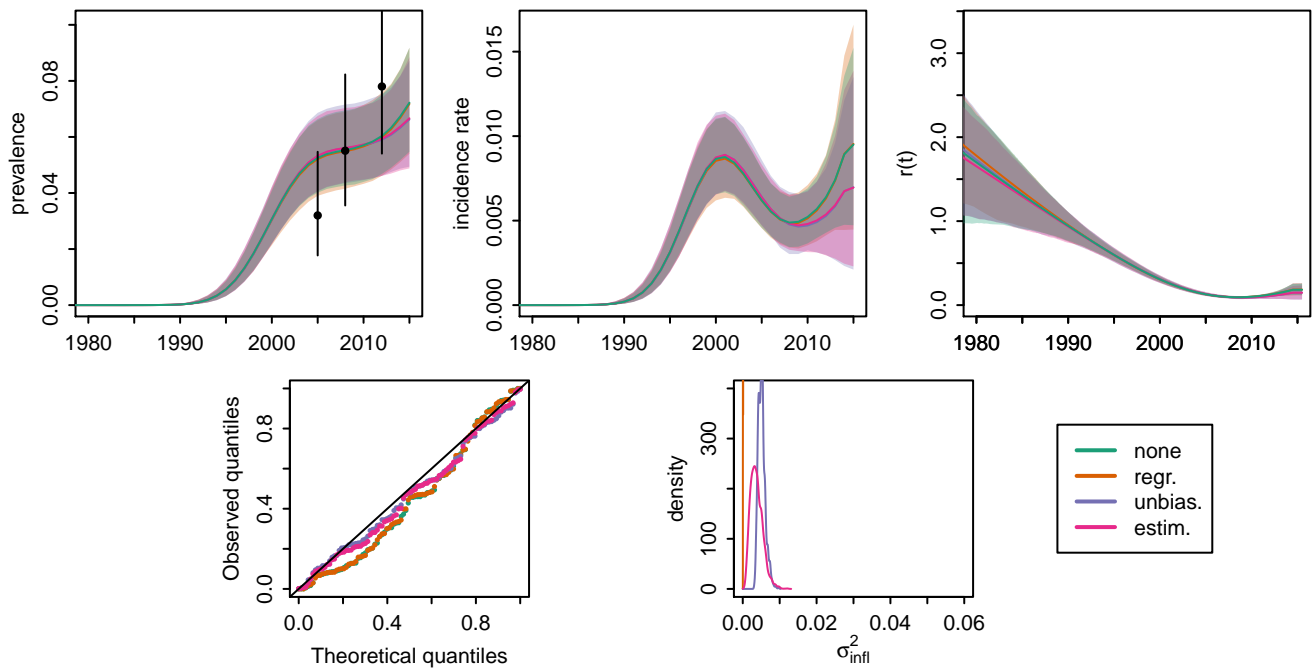

r-trend

### South Africa EC

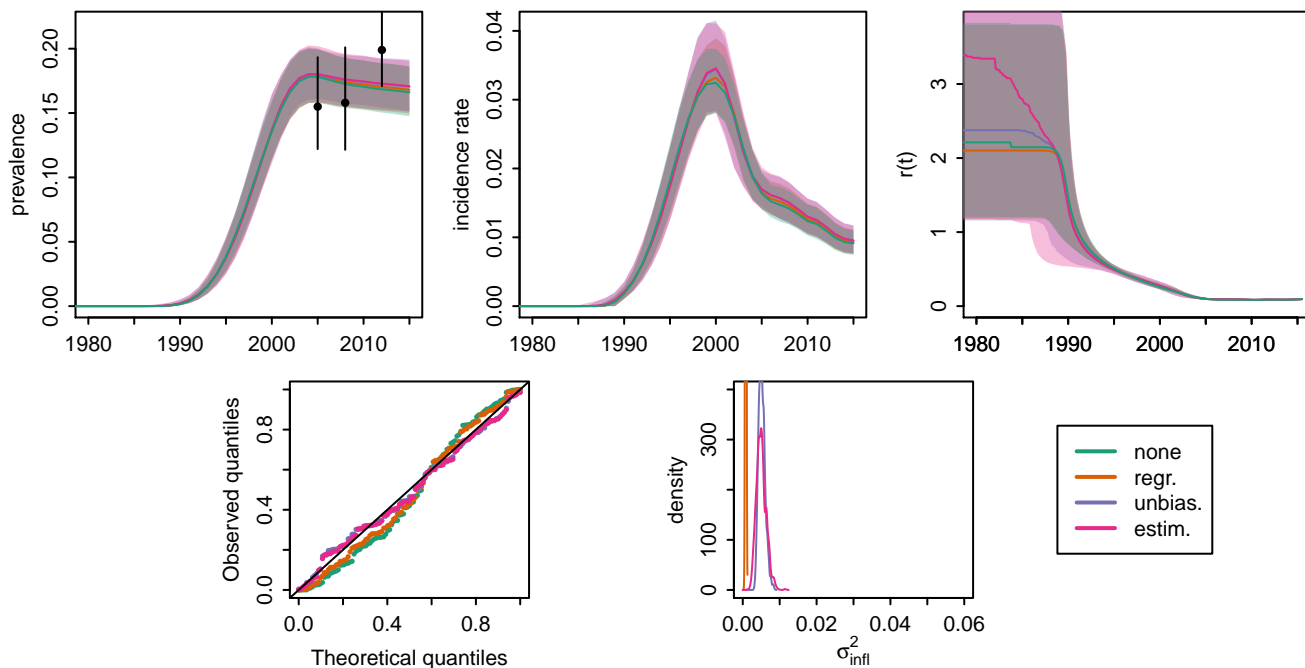

r-spline

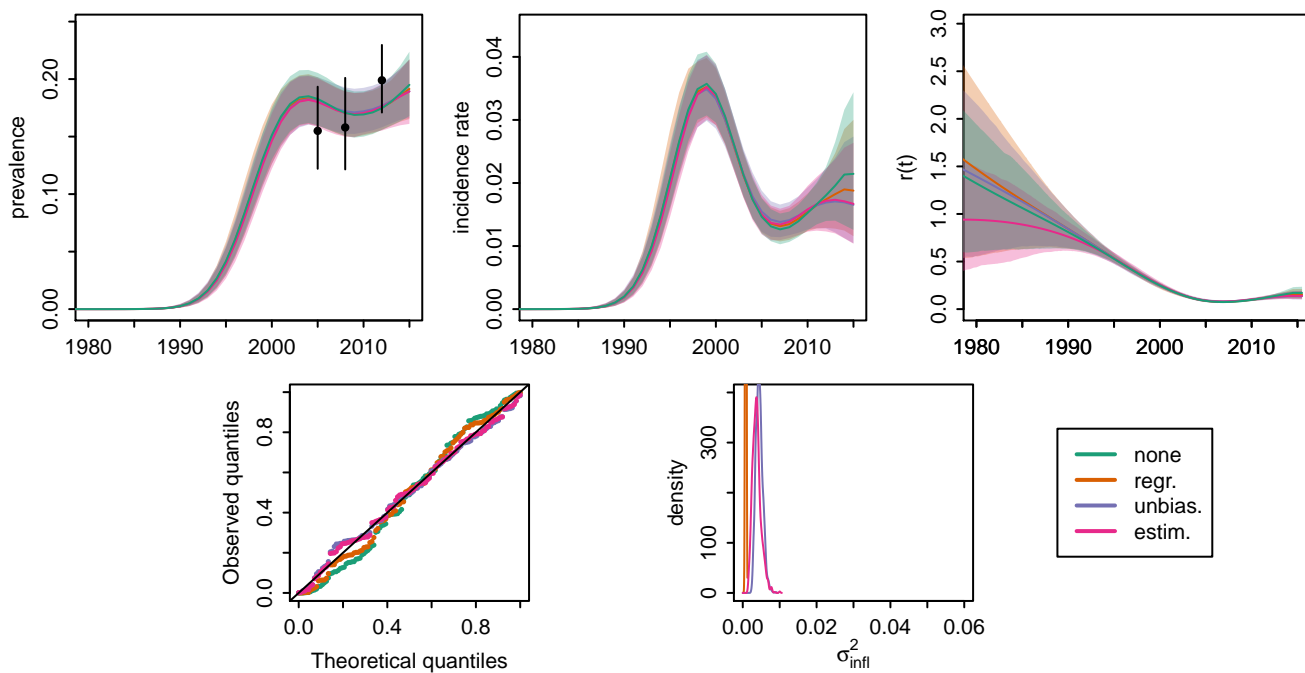

r-spline, no equil. prior

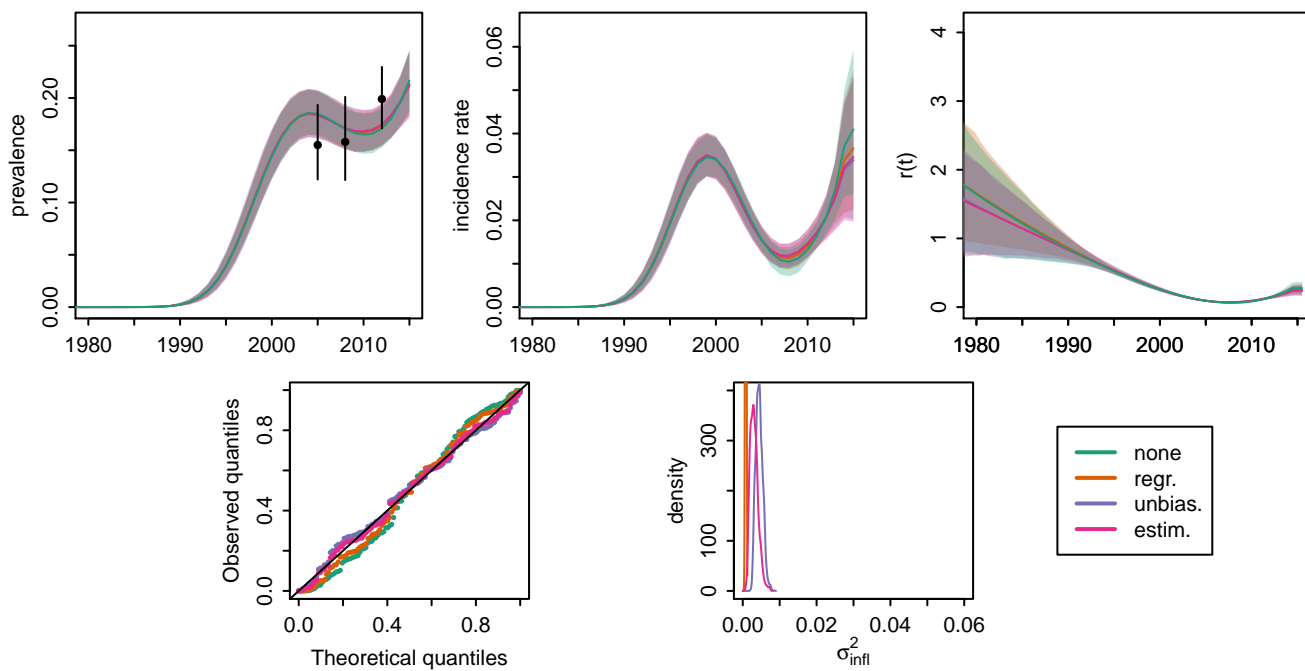



### r-trend

### South Africa LP

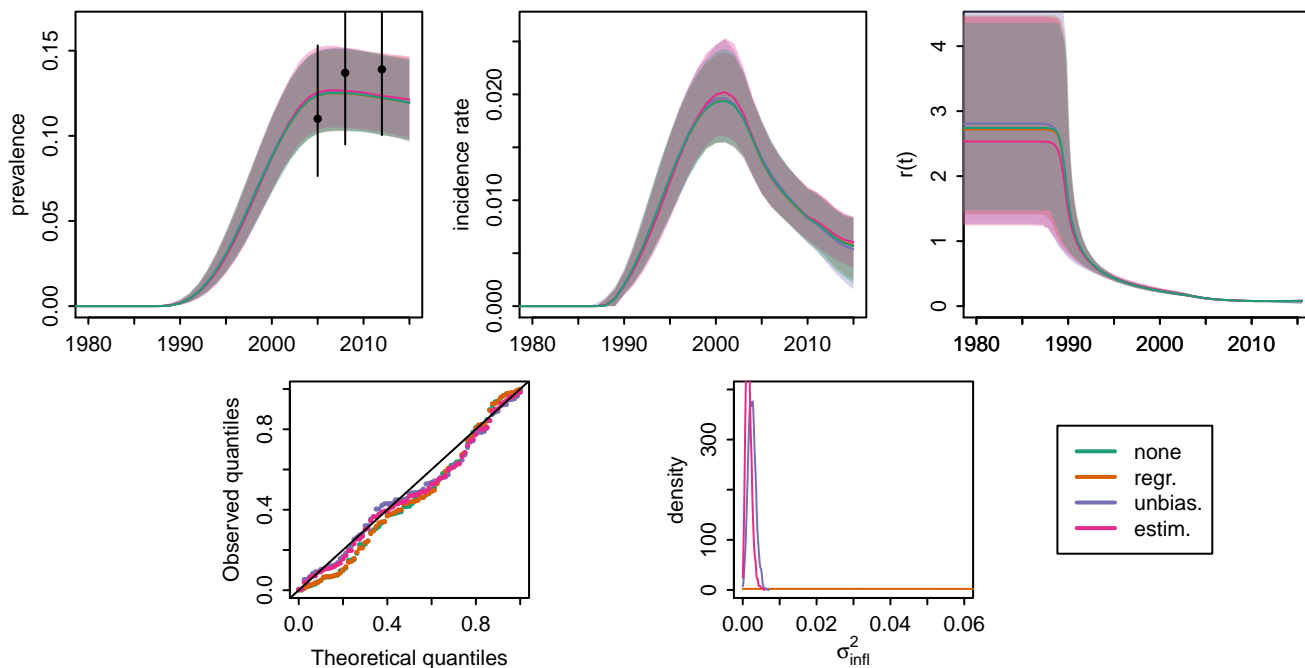

### r-spline

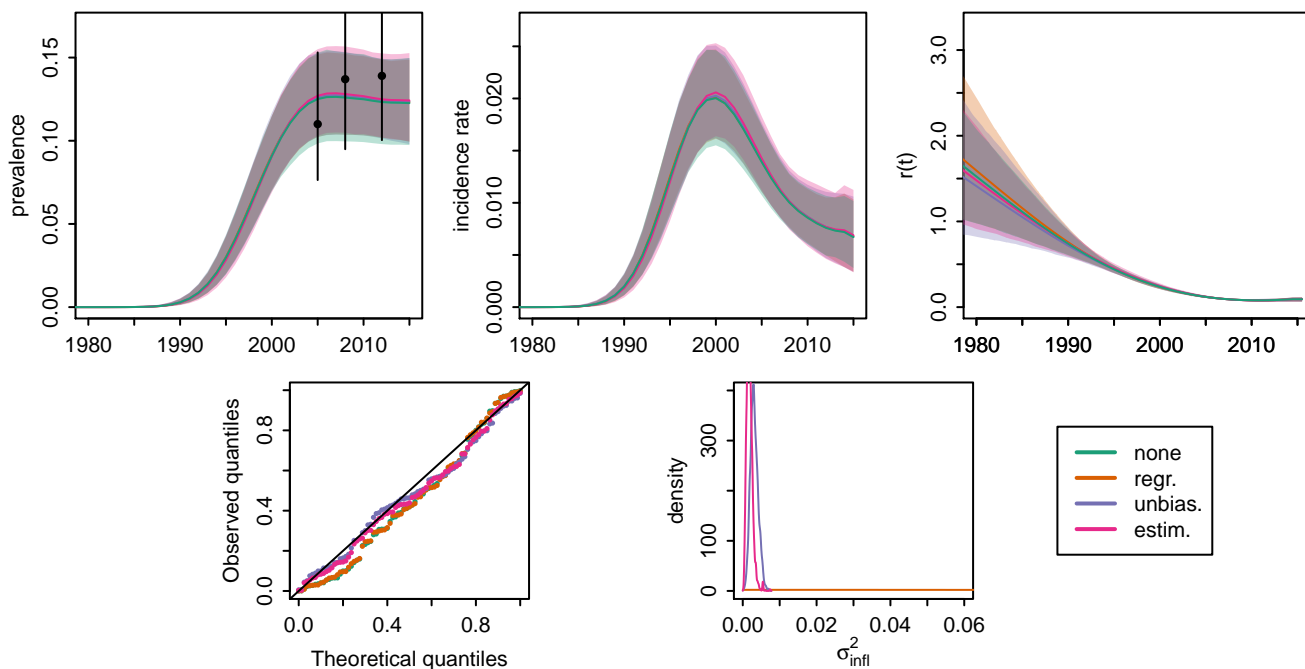

### r-spline, no equil. prior

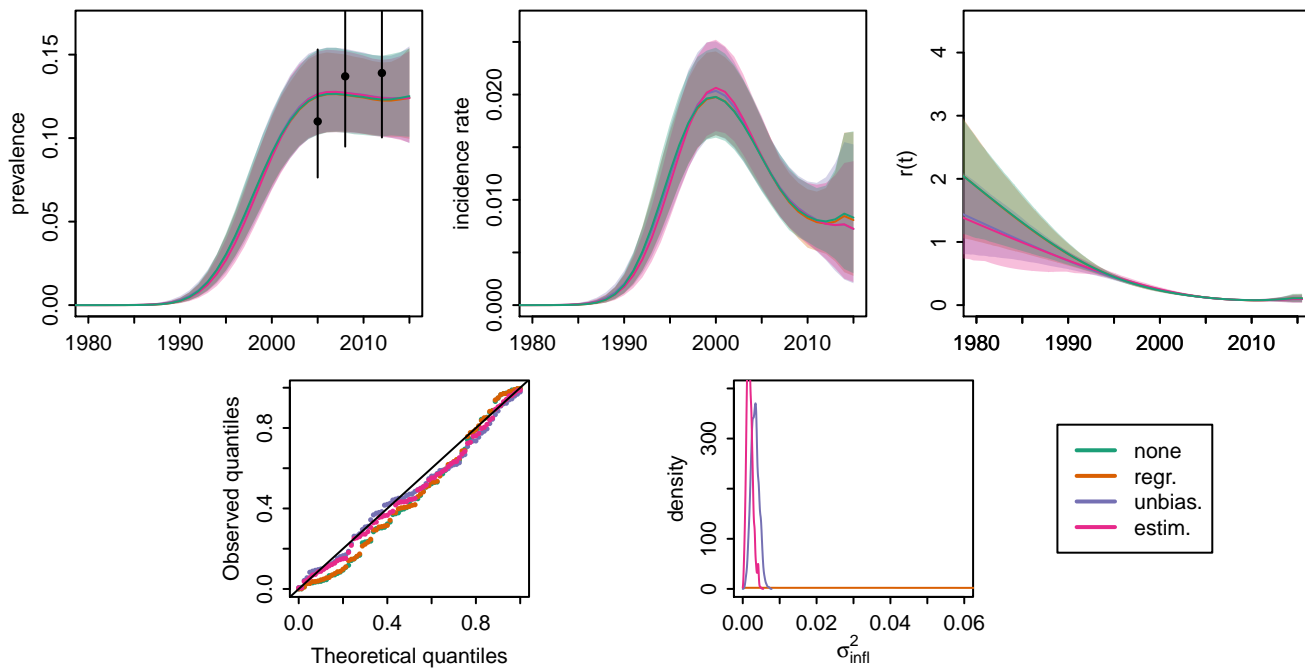

### r-trend

### South Africa FS

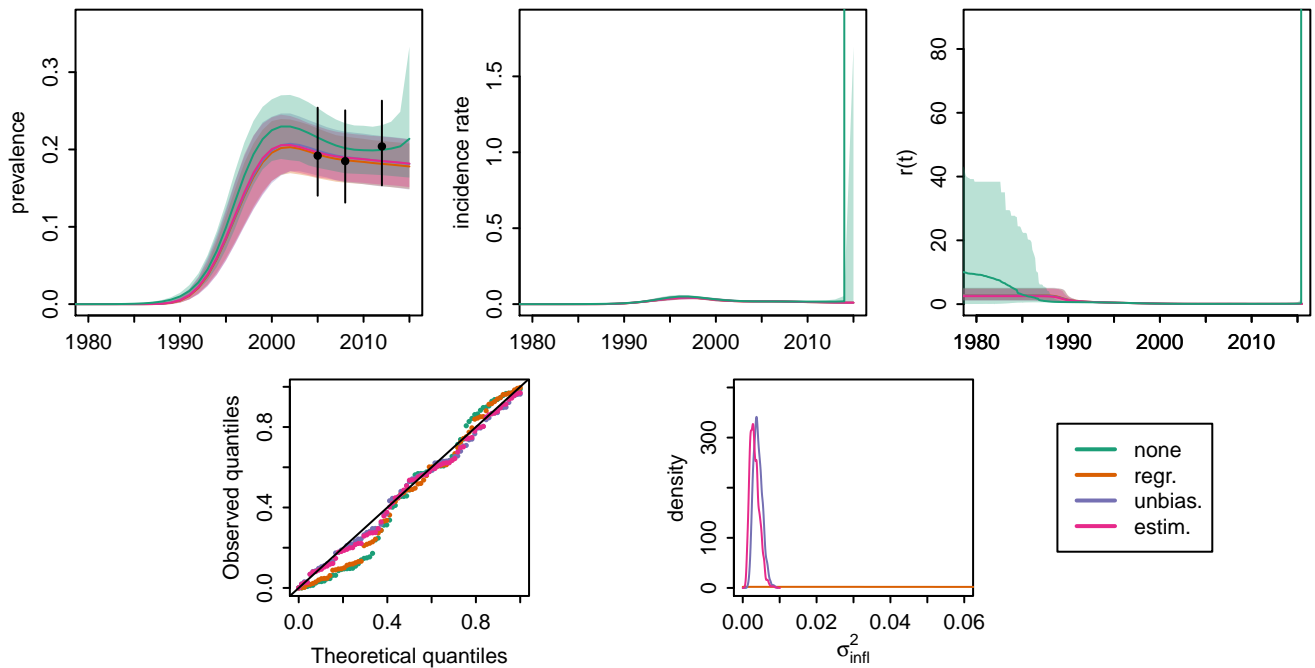

### r-spline

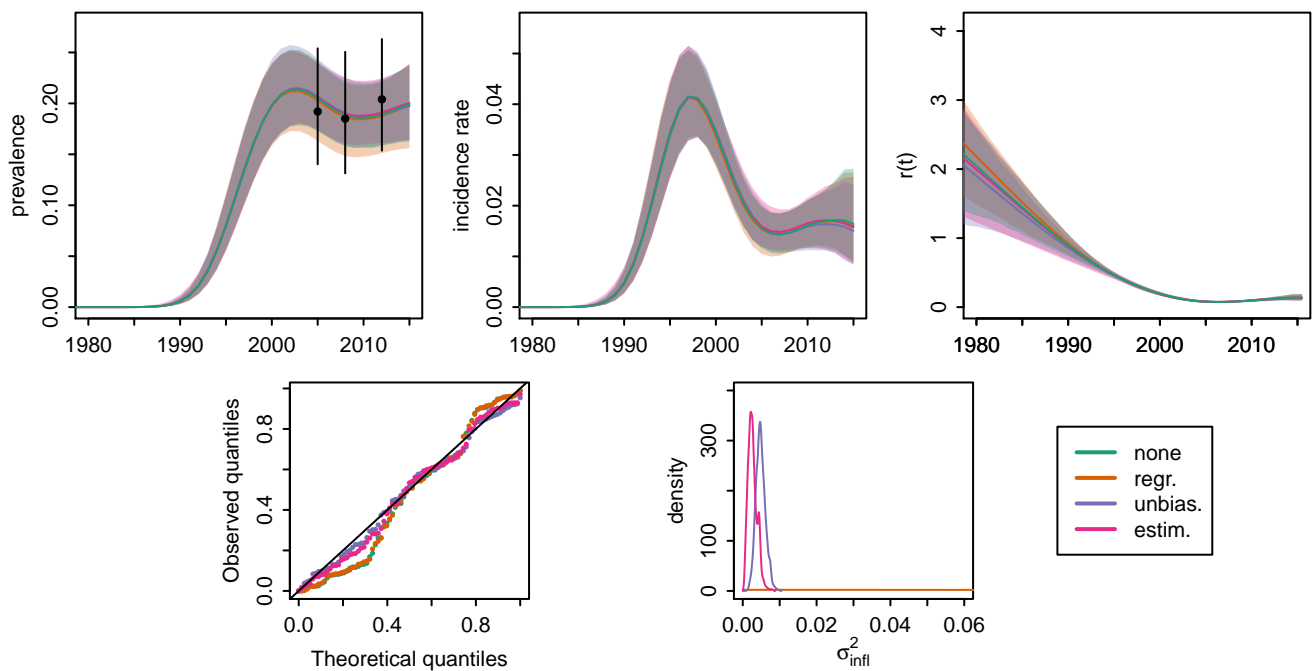

### r-spline, no equil. prior

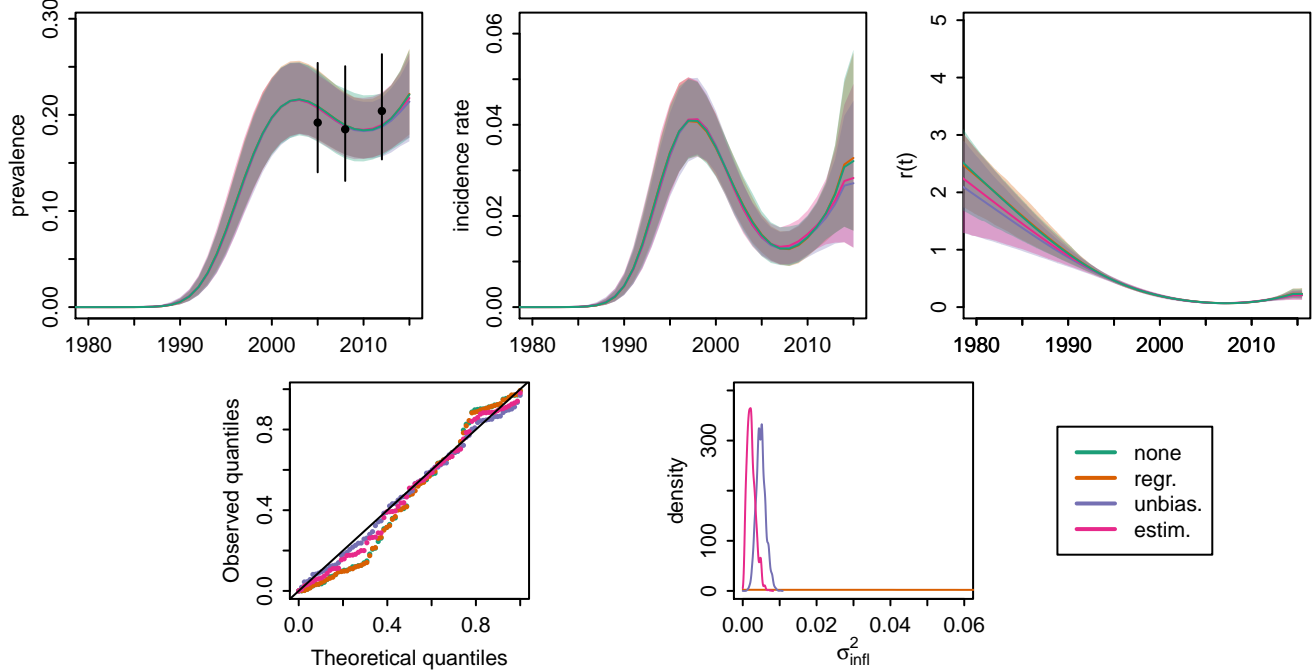

r-trend

### South Africa NW

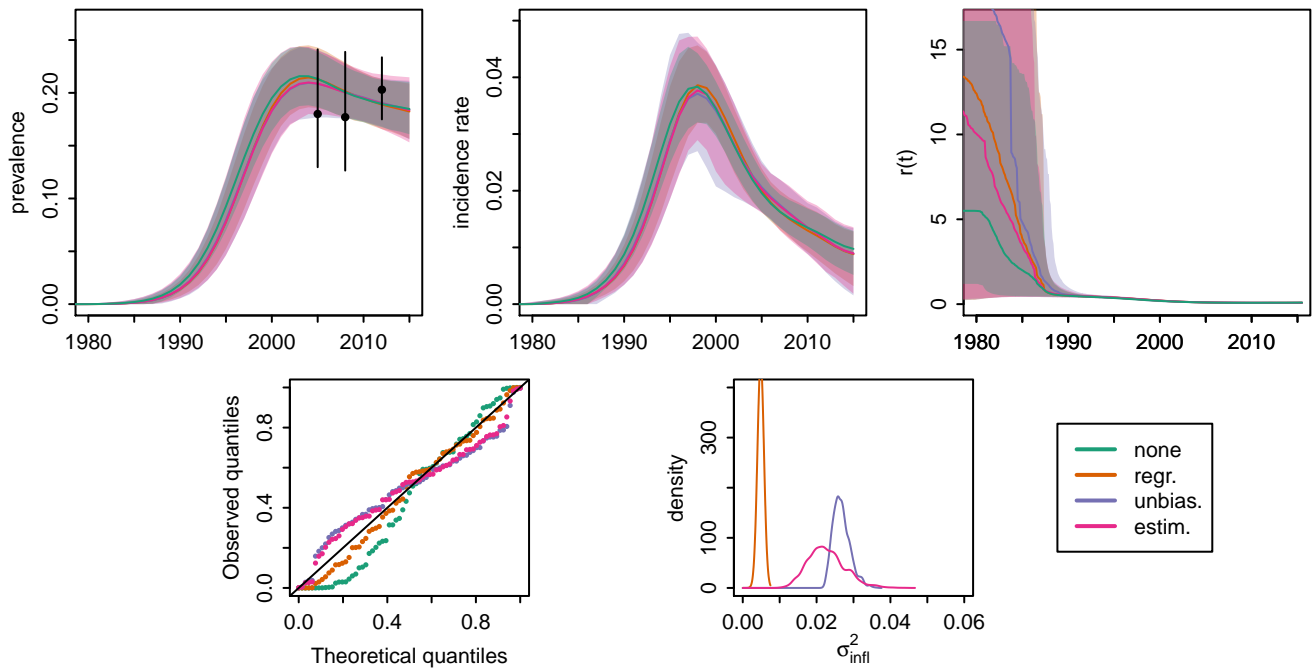

r-spline

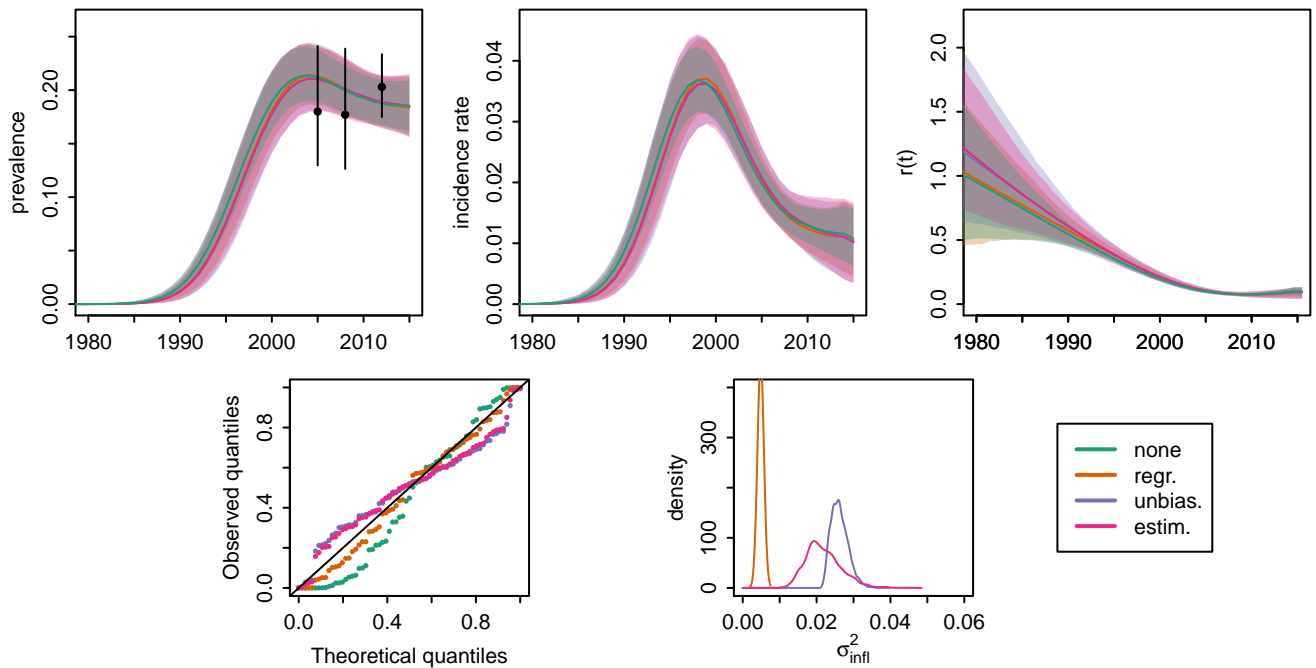

r-spline, no equil. prior

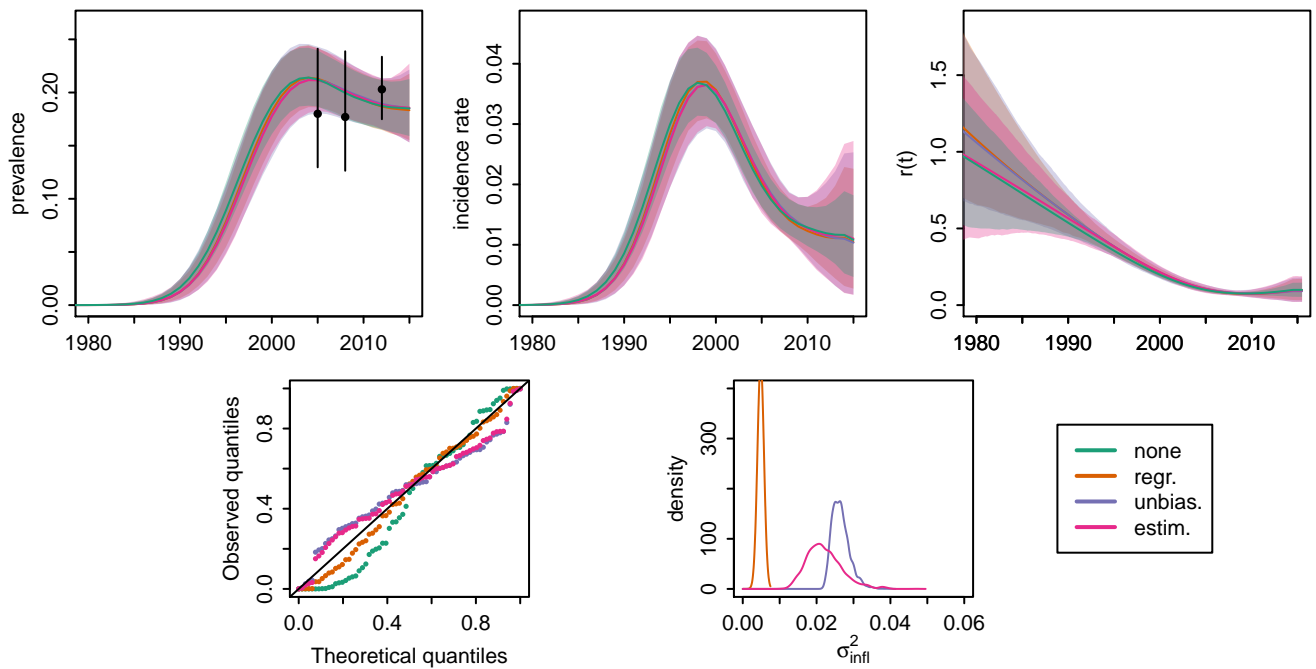

### r-trend

### South Africa NC

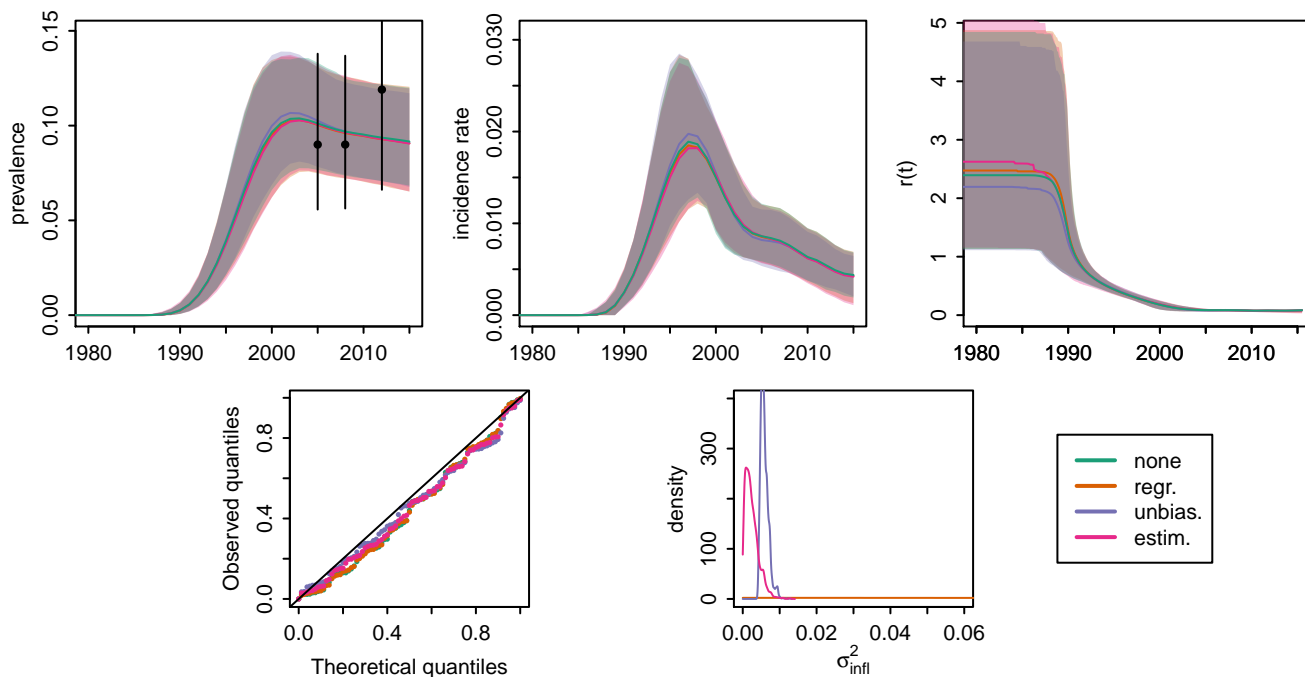

### r-spline

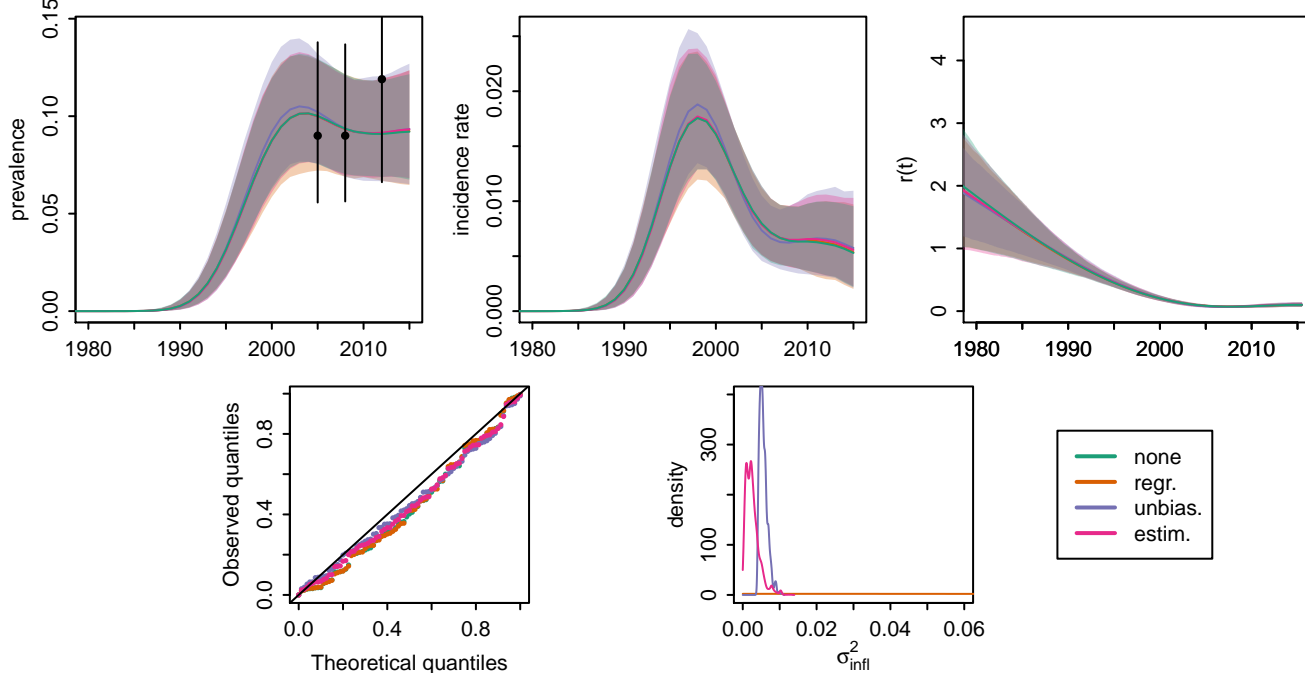

### r-spline, no equil. prior

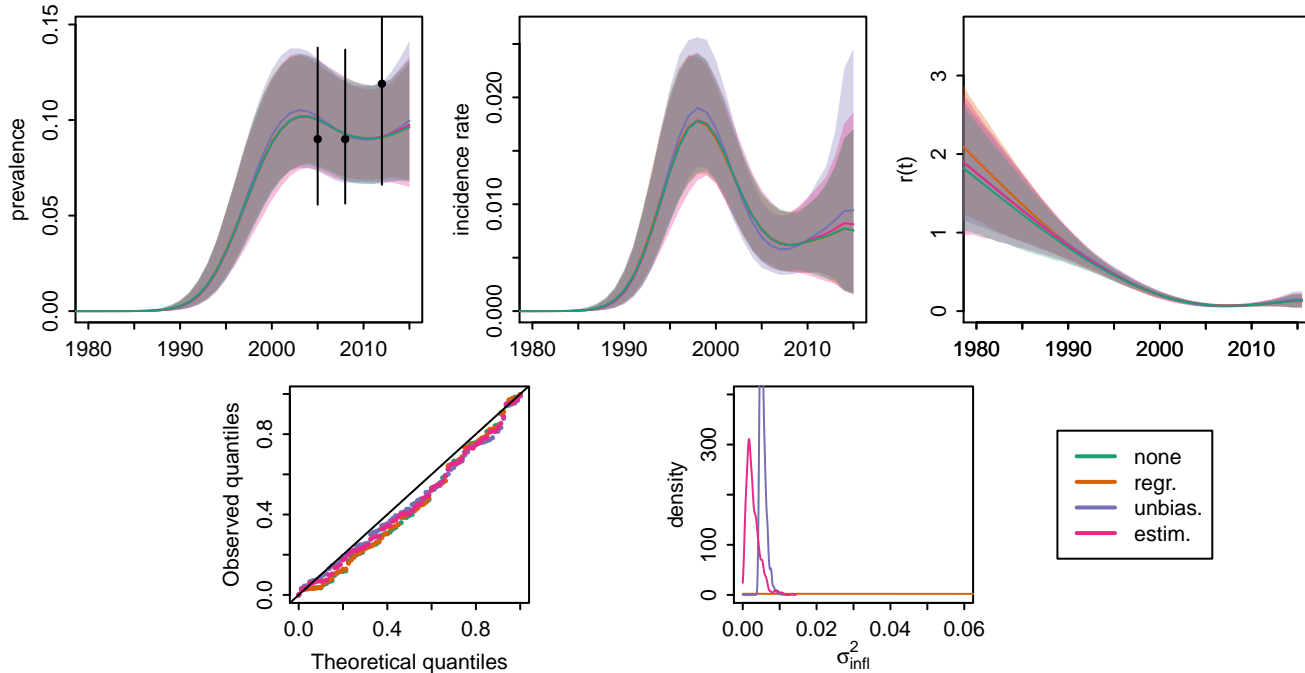

r-trend

### Zambia Urban

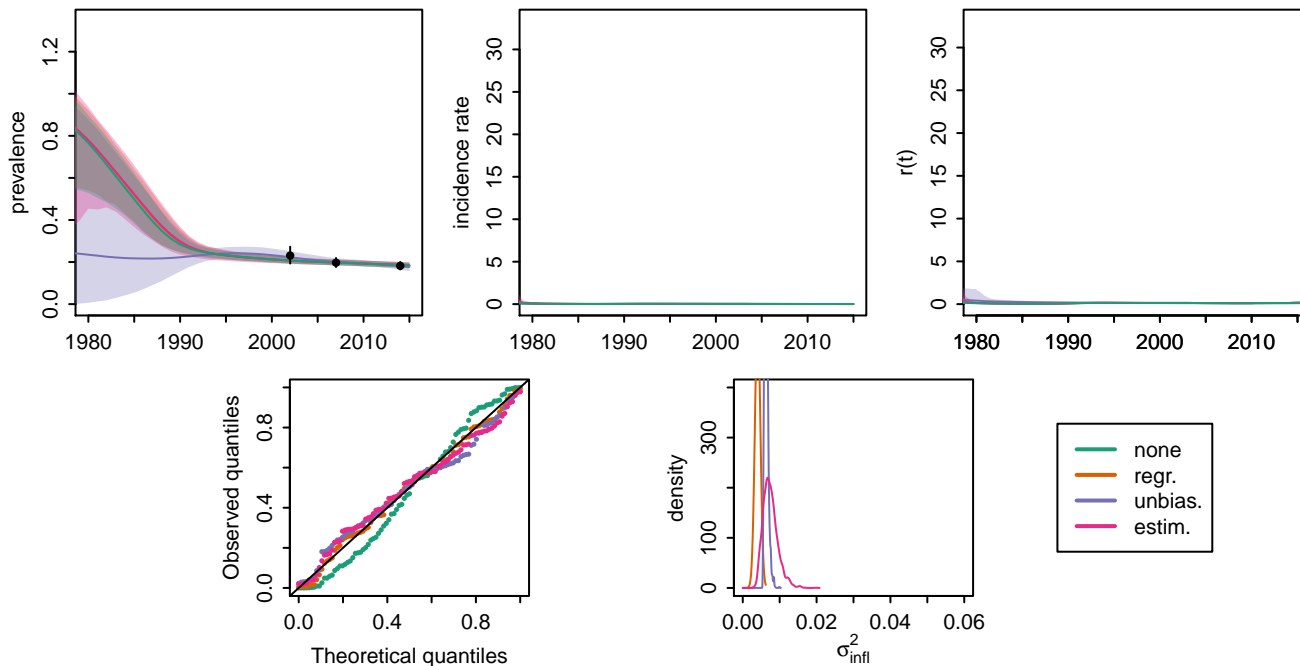

r-spline

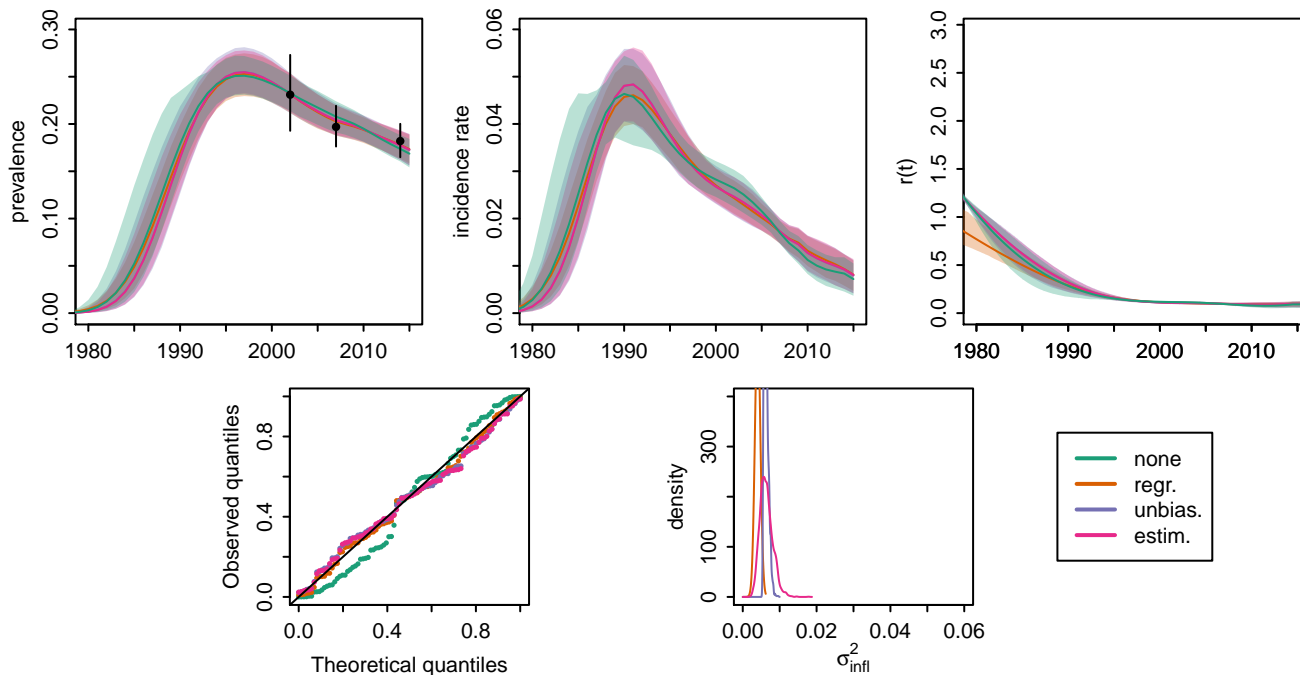

r-spline, no equil. prior

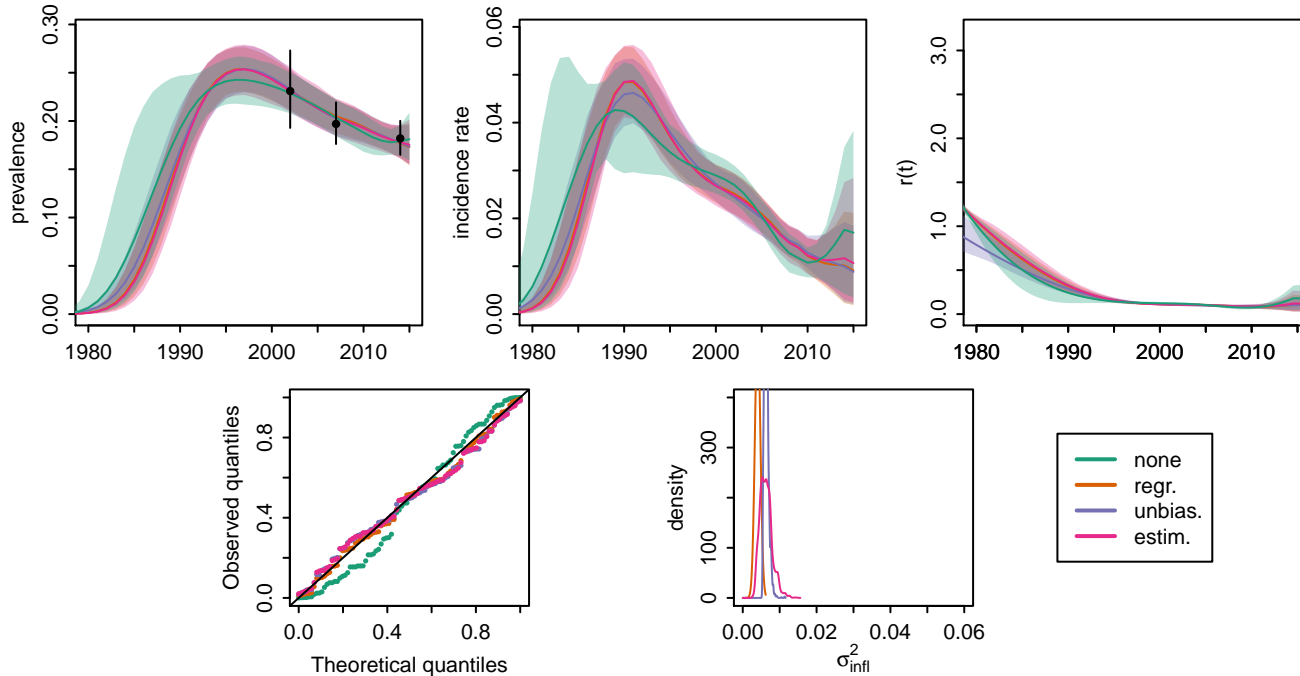

r-trend

# Zambia Rural

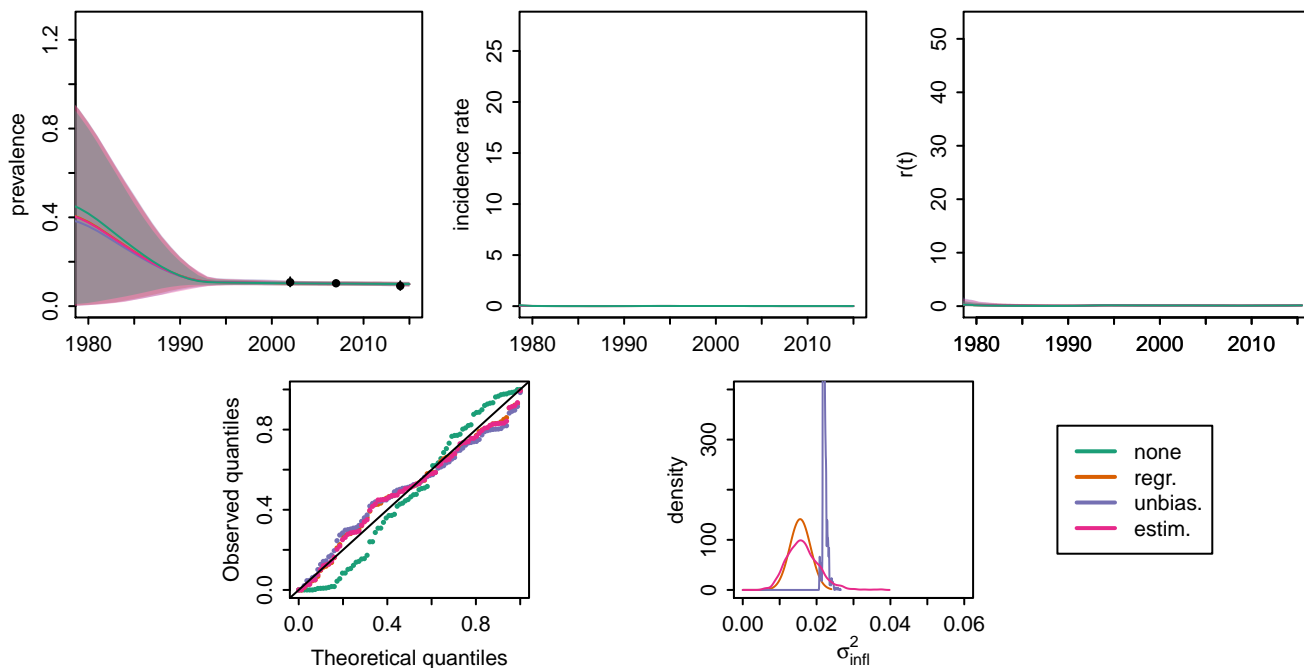

r-spline

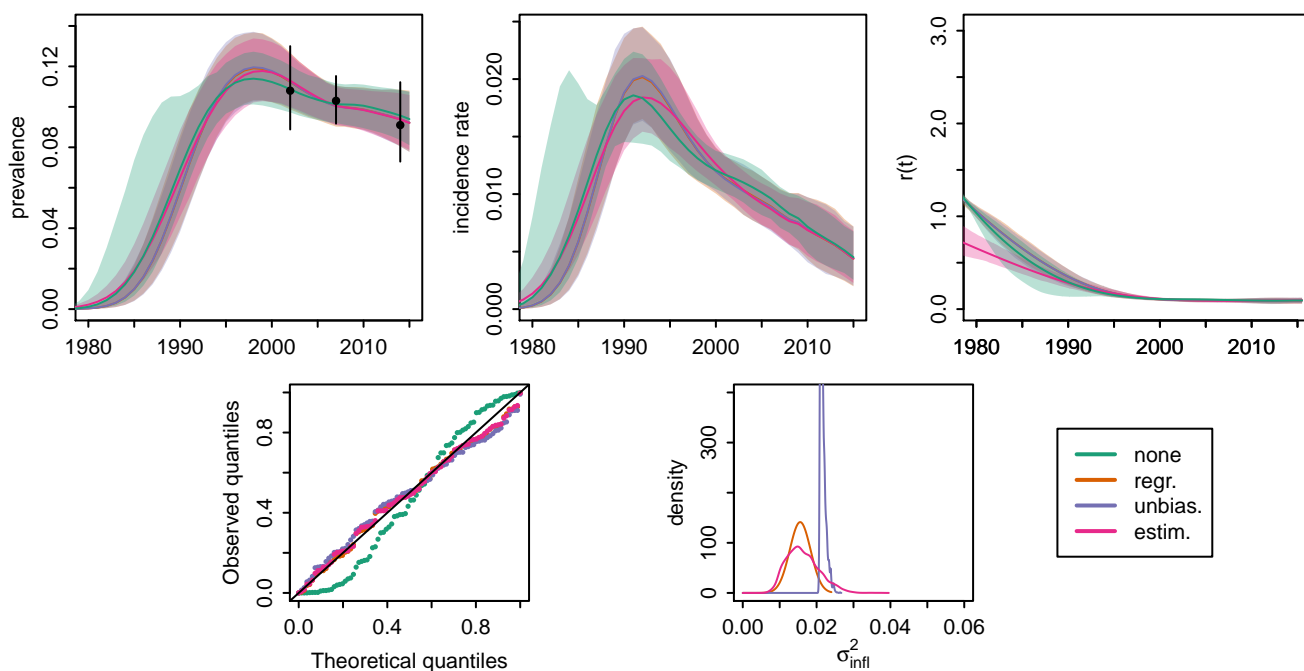

r-spline, no equil. prior

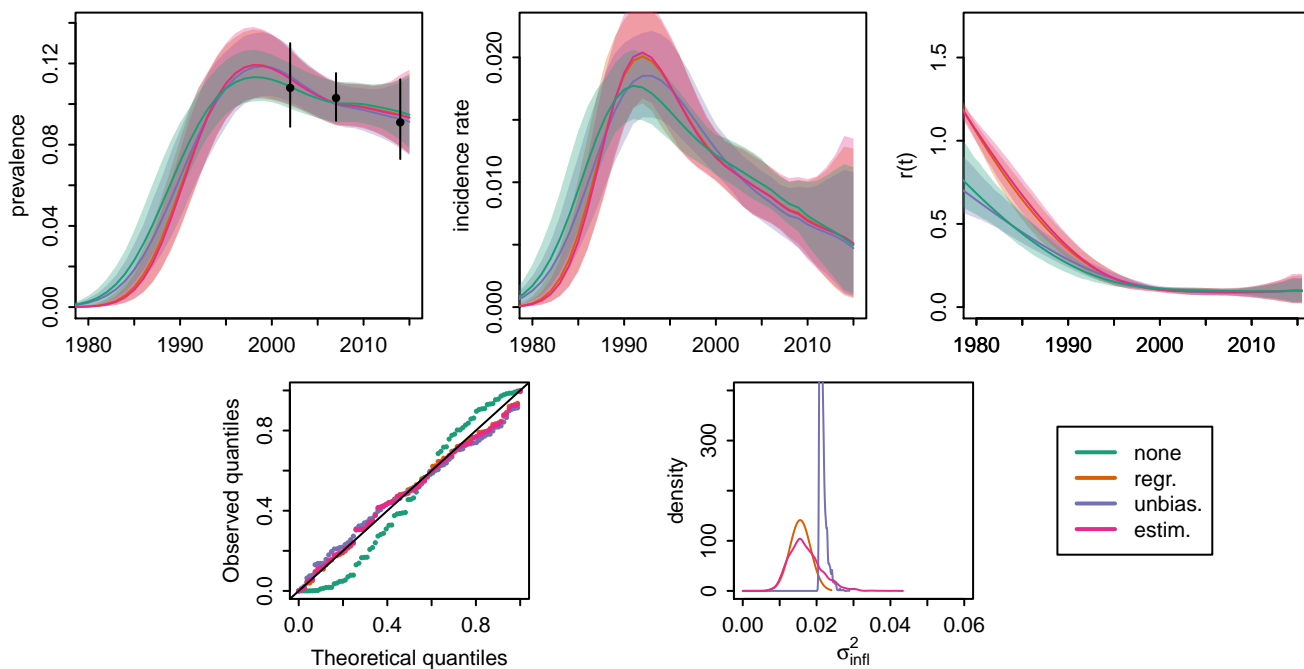

### r-trend

### Kenya Central

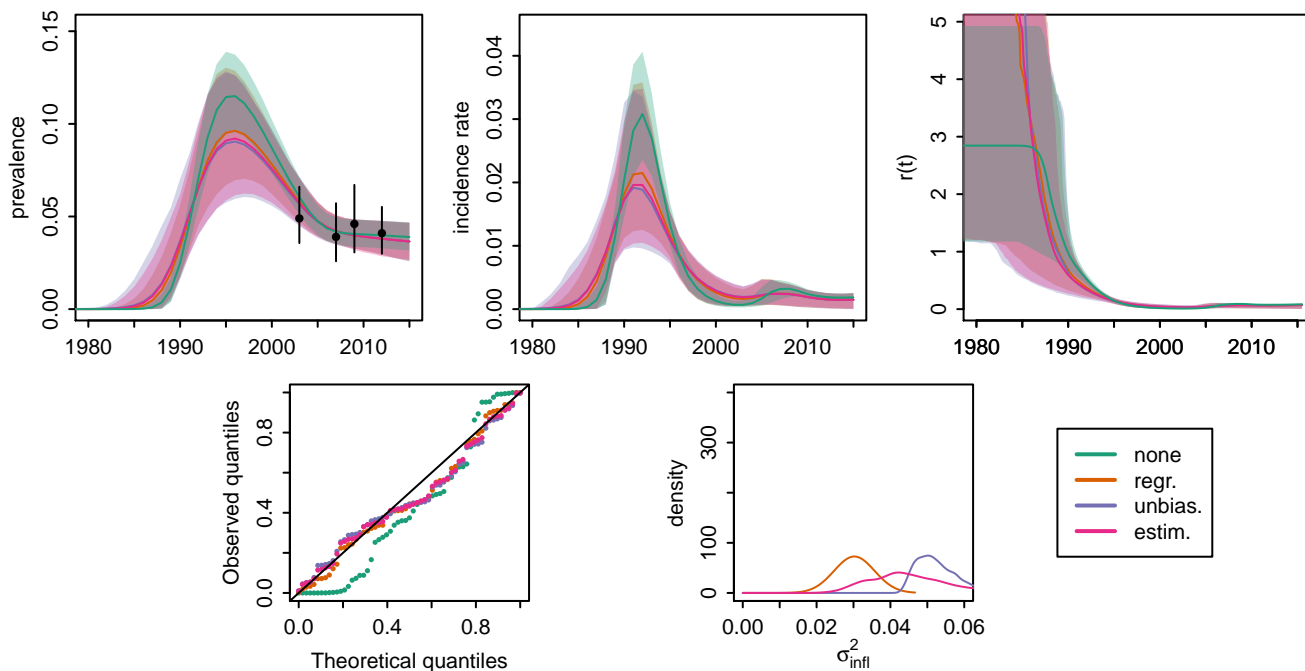

### r-spline

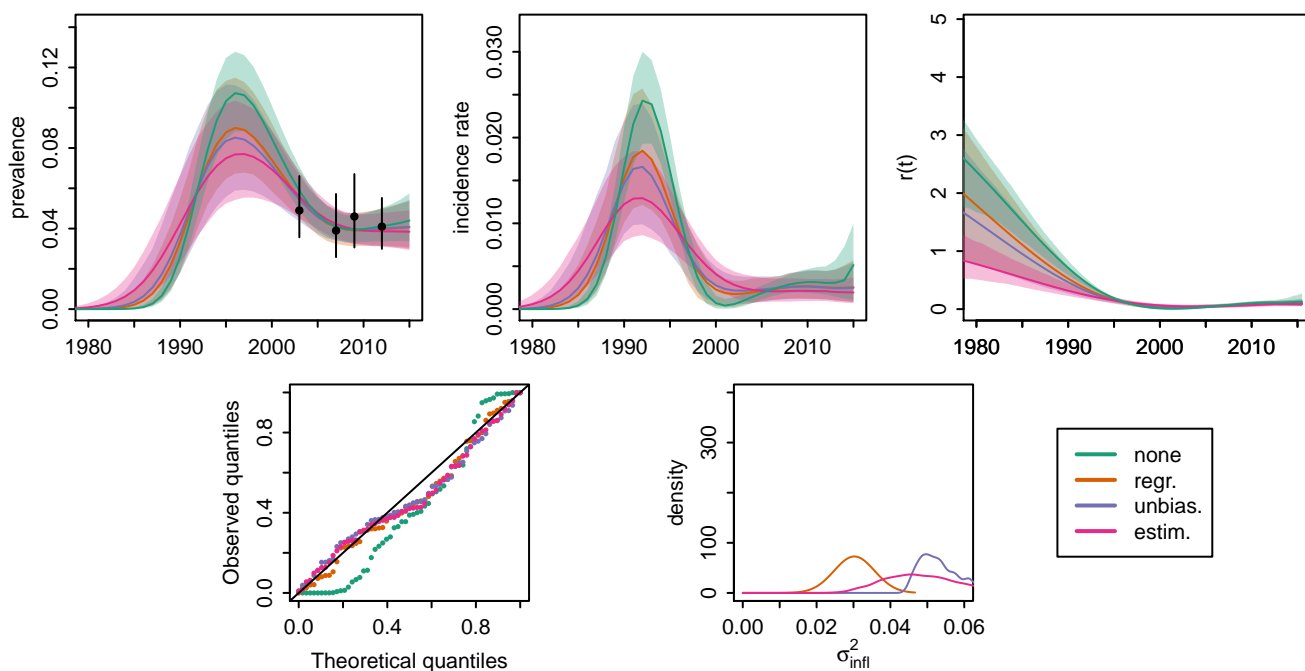

### r-spline, no equil. prior

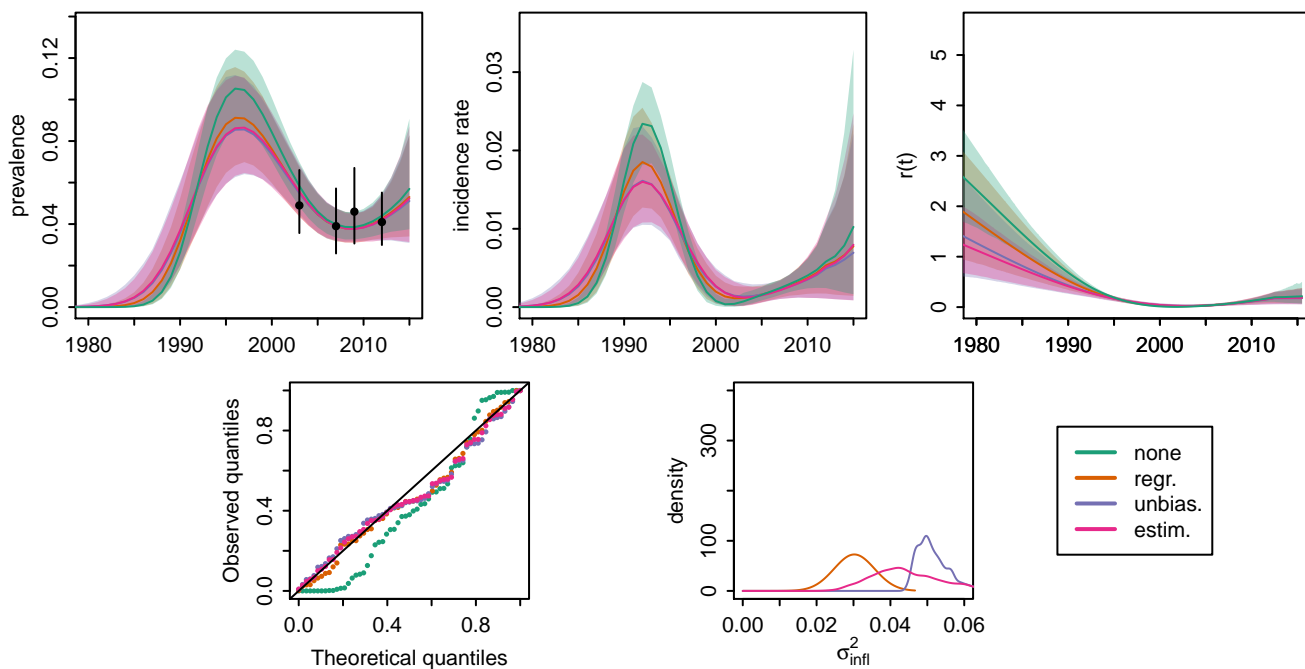

### r-trend

### Kenya Coast

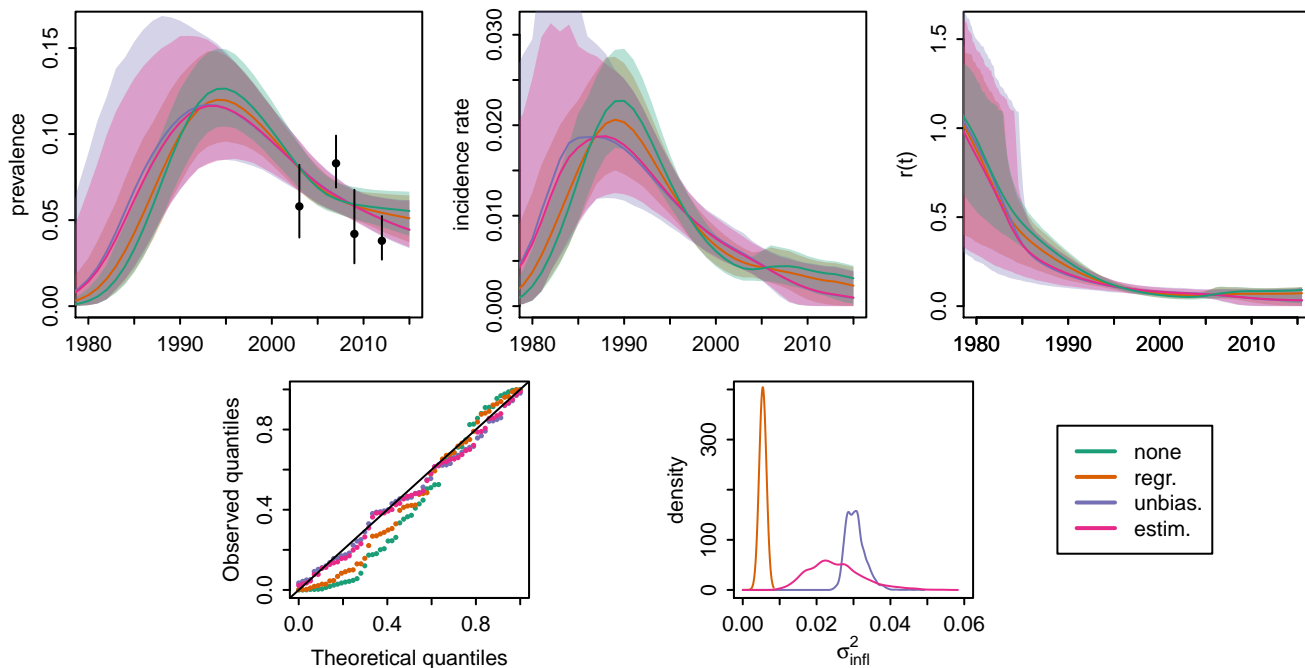

### r-spline

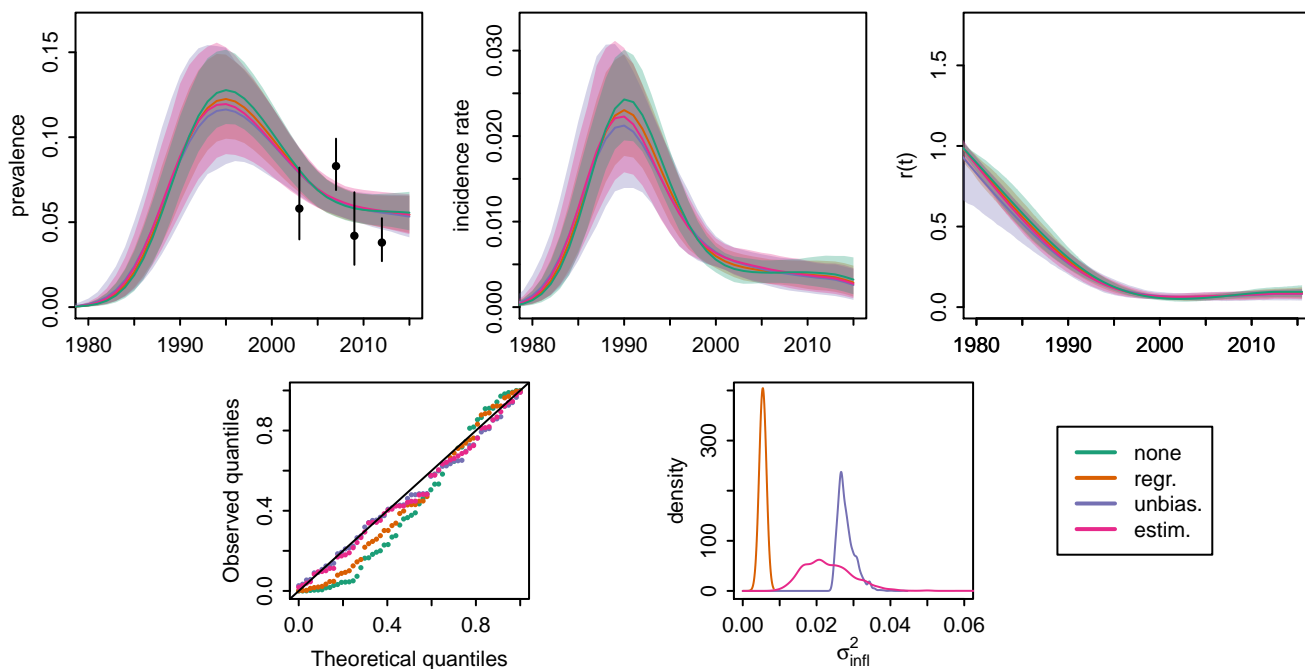

### r-spline, no equil. prior

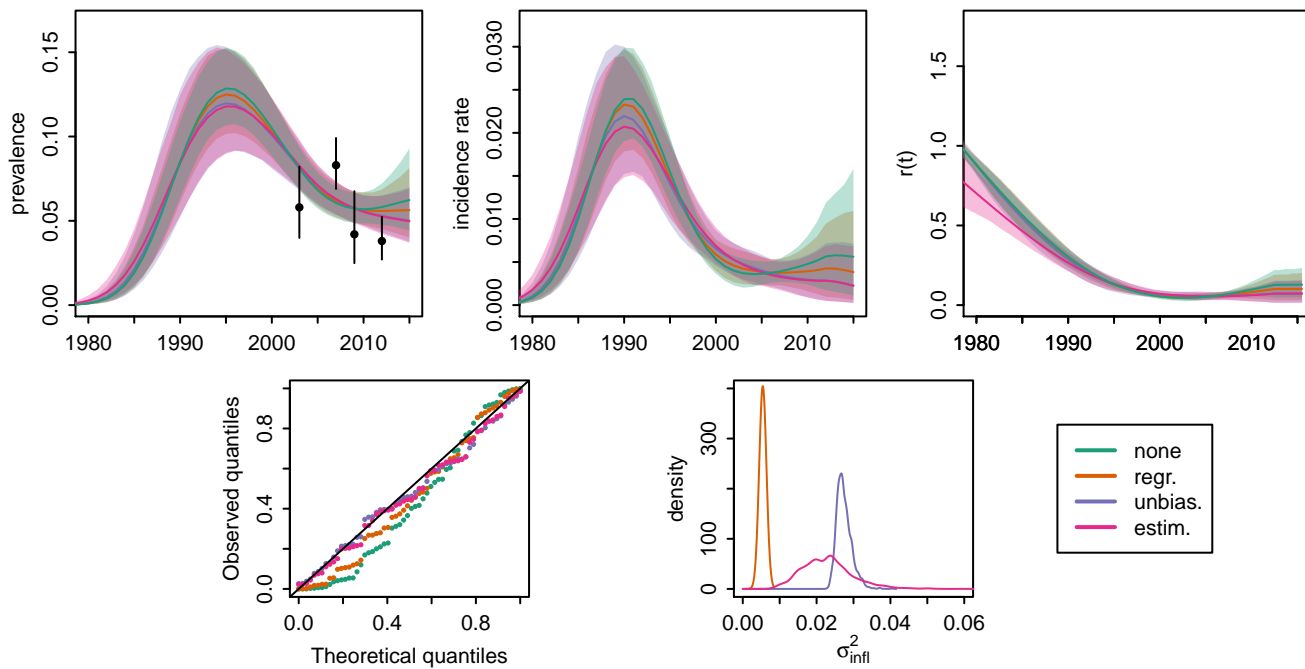



### r-trend

## Kenya Eastern

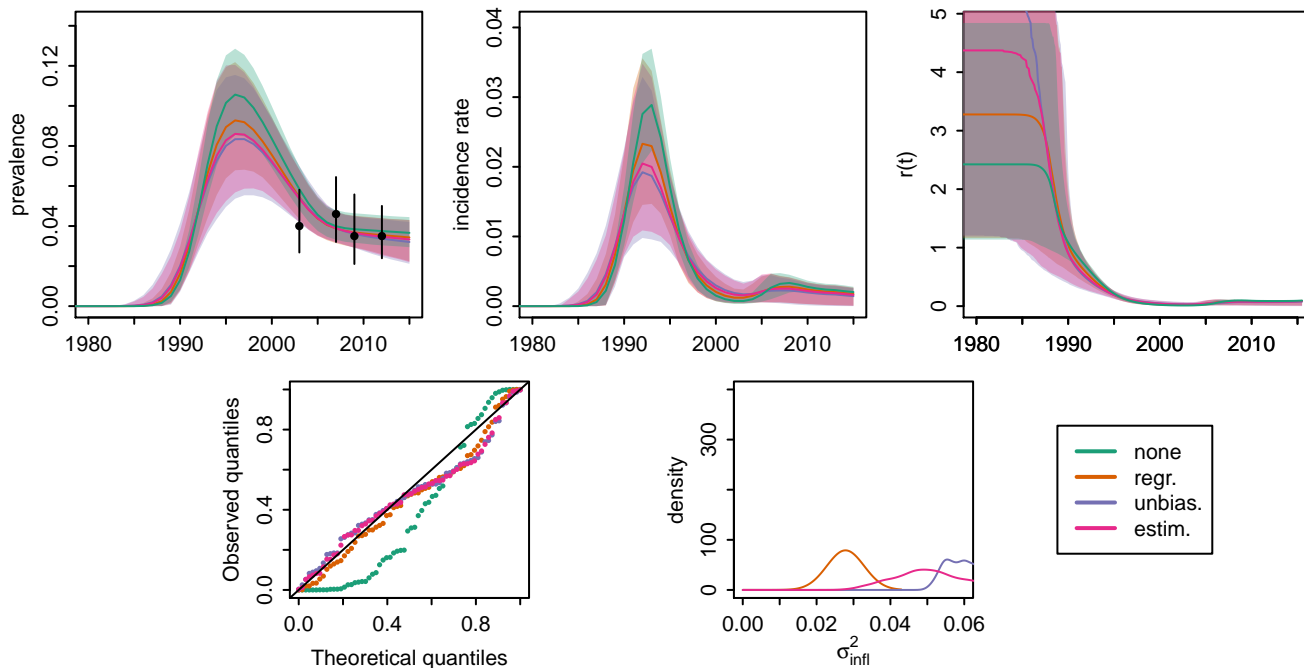

### r-spline

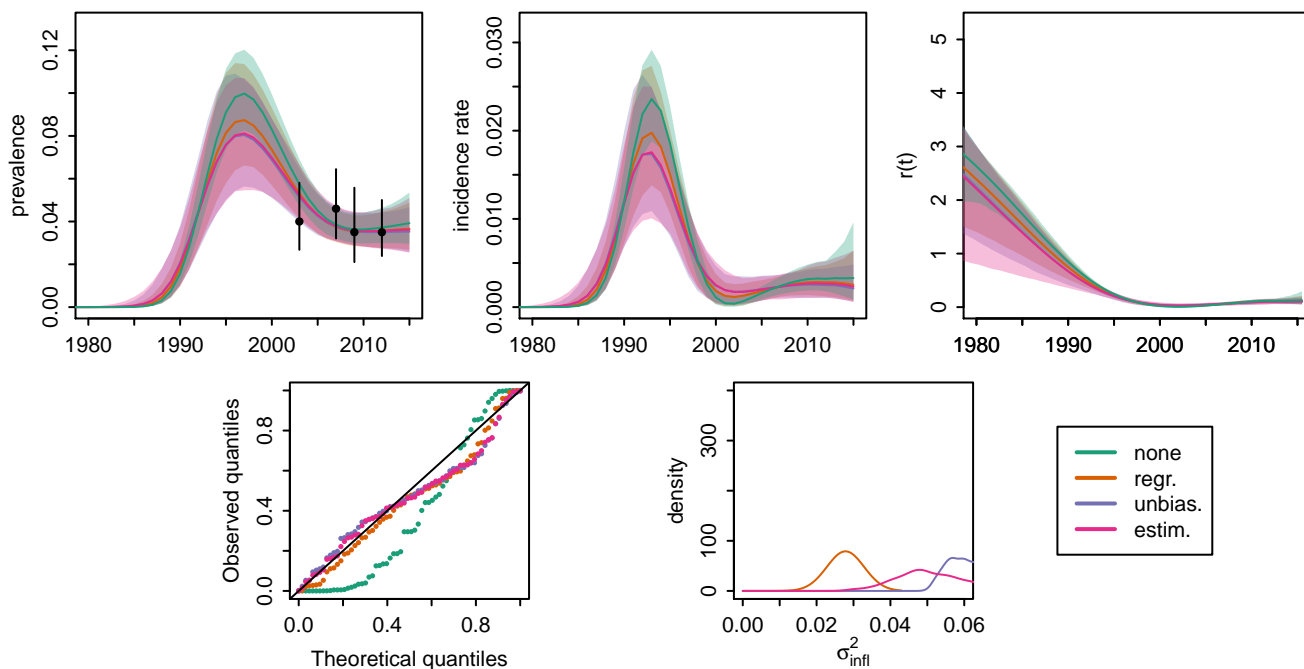

### r-spline, no equil. prior

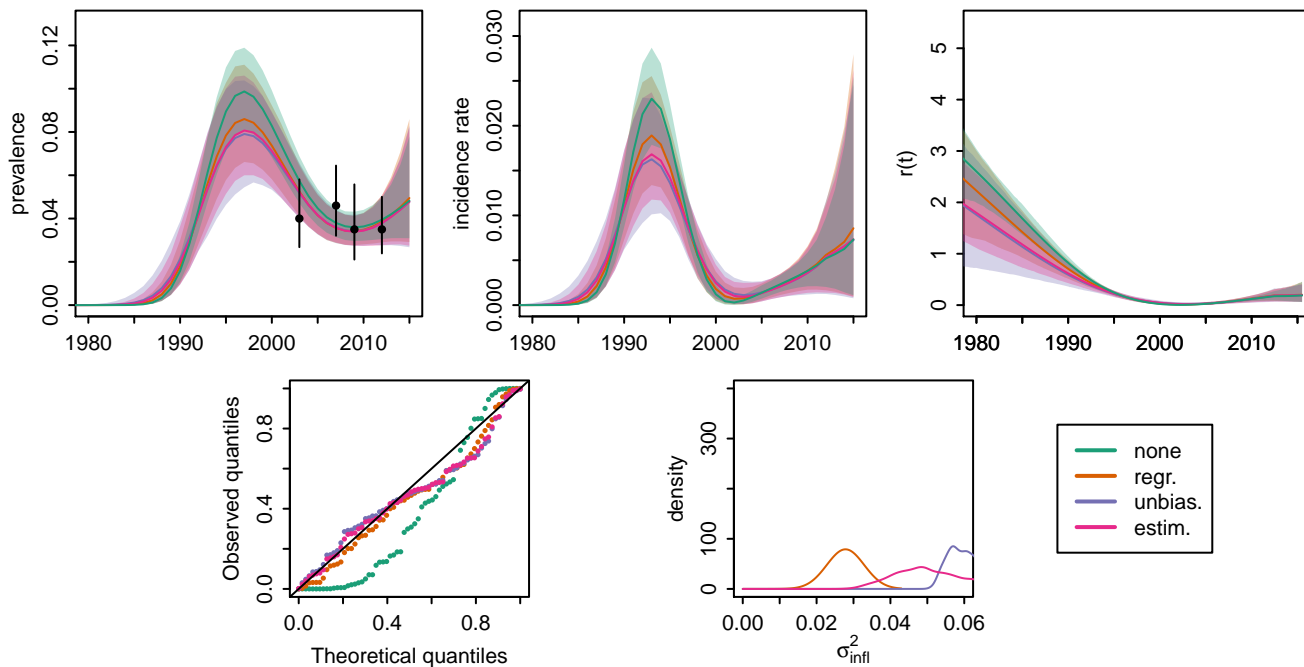

r-trend

# Kenya Nairobi

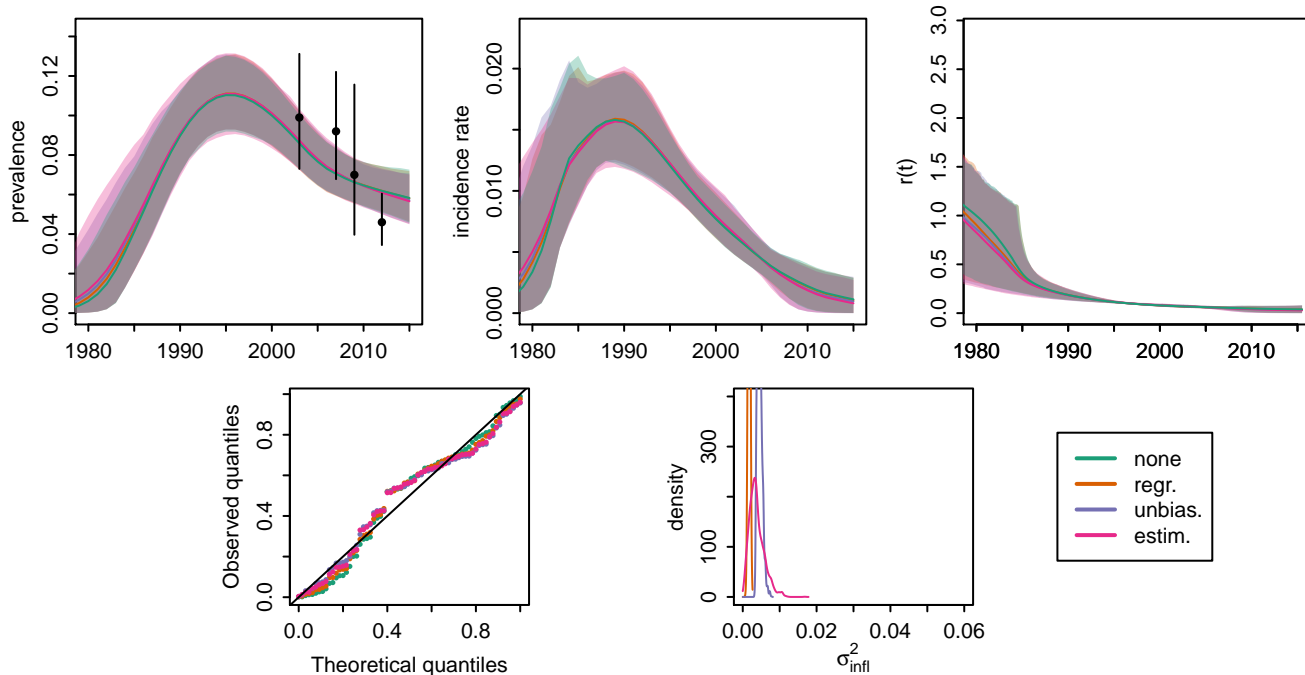

r-spline

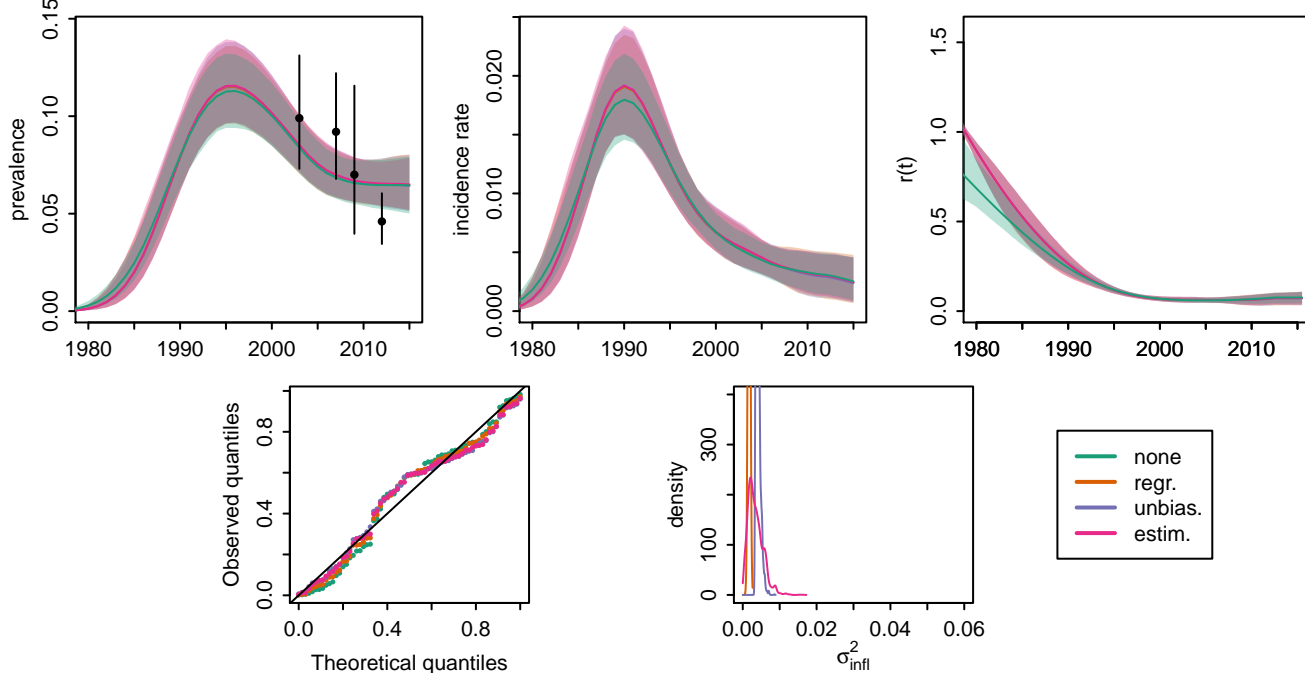

r-spline, no equil. prior

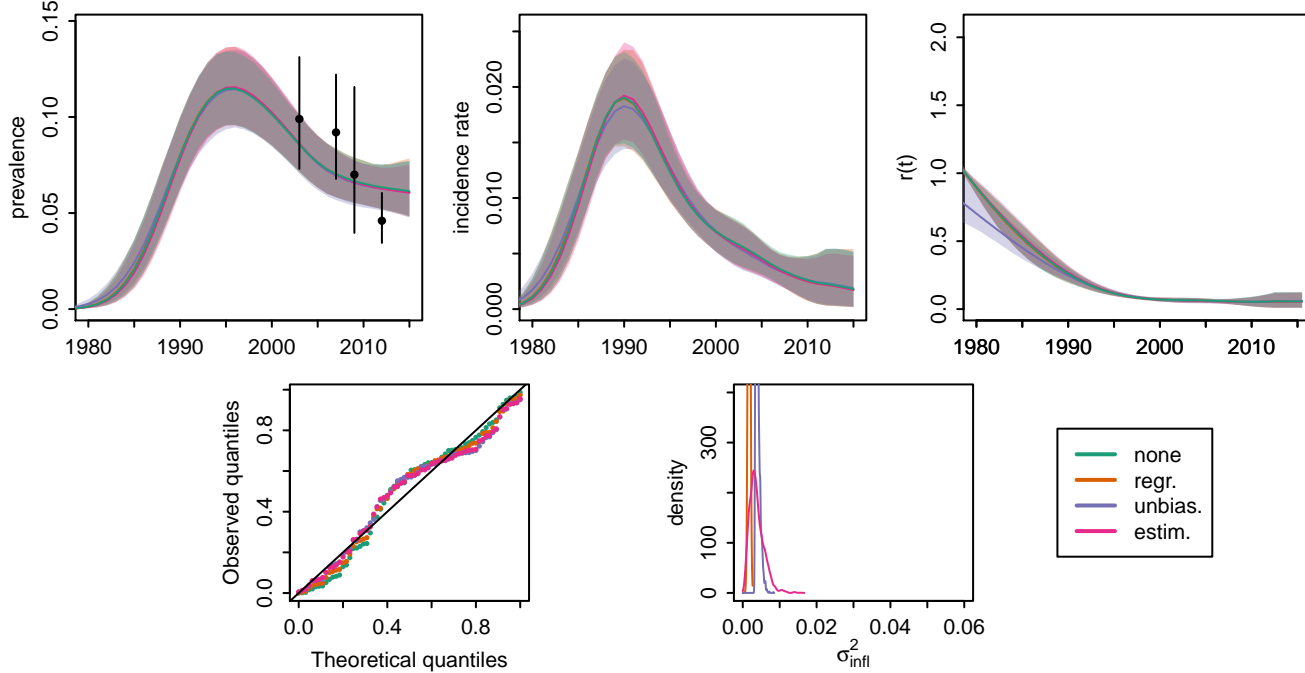

### r-trend

### Kenya North Eastern

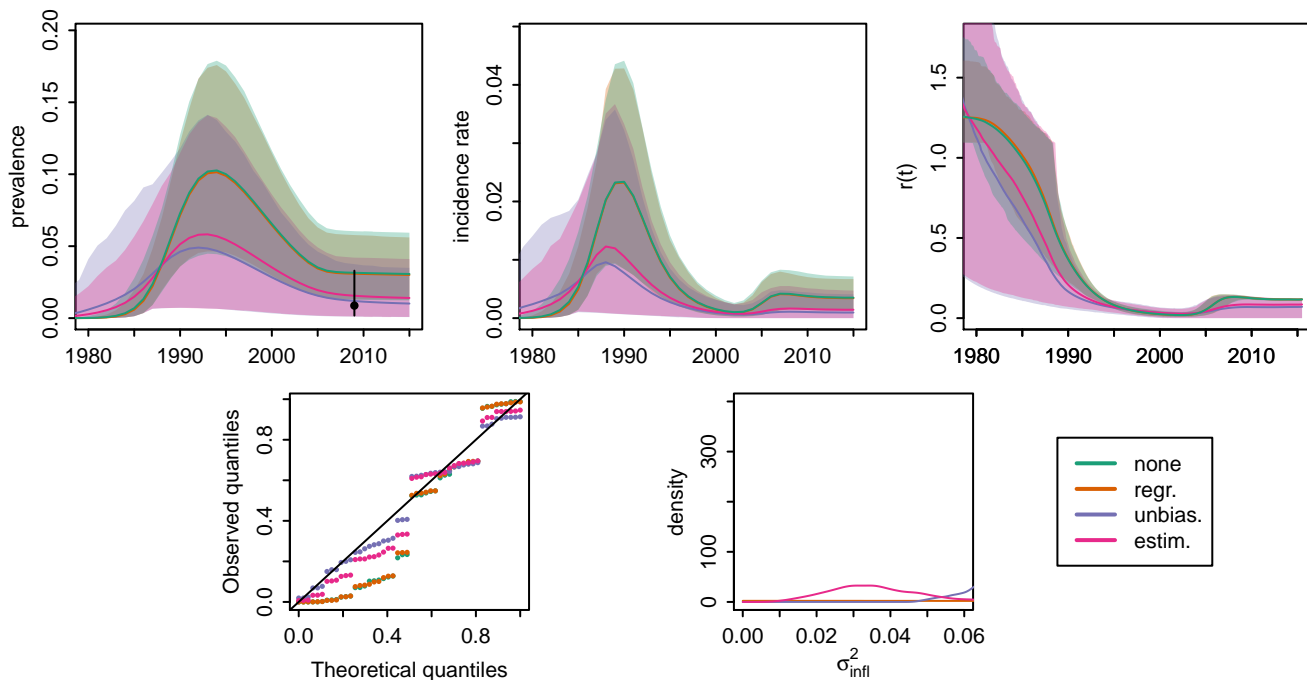

### r-spline

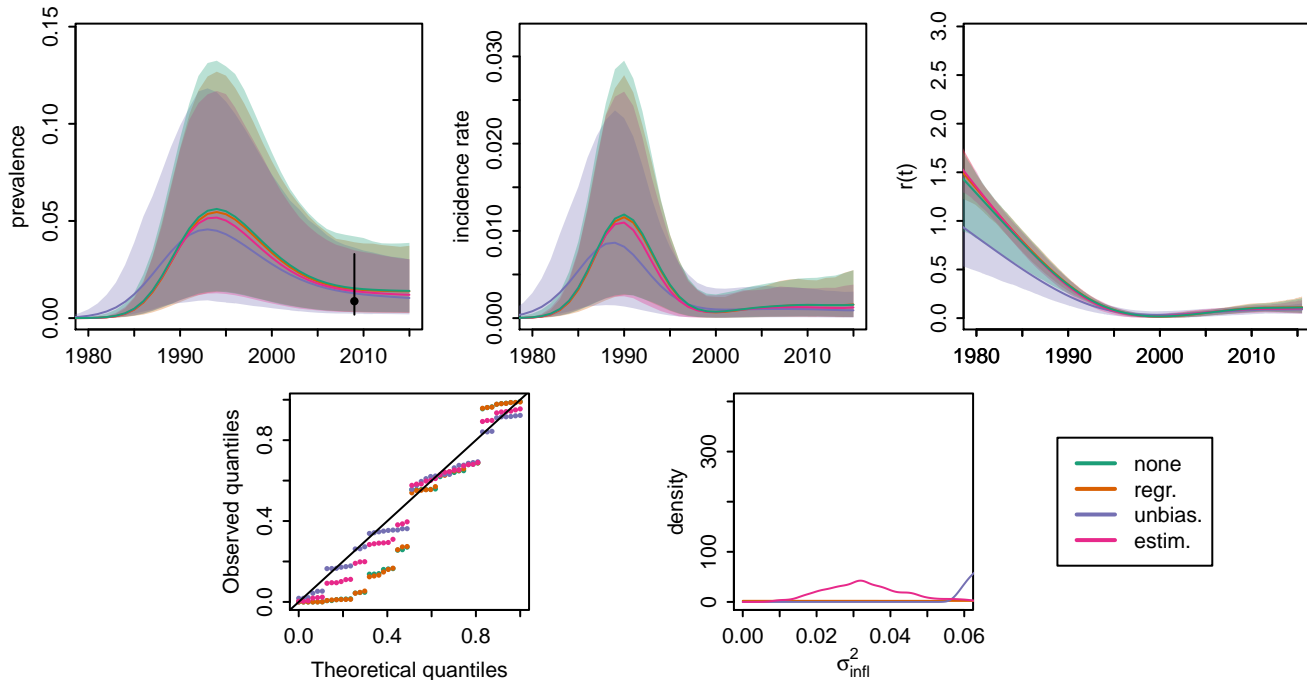

### r-spline, no equil. prior

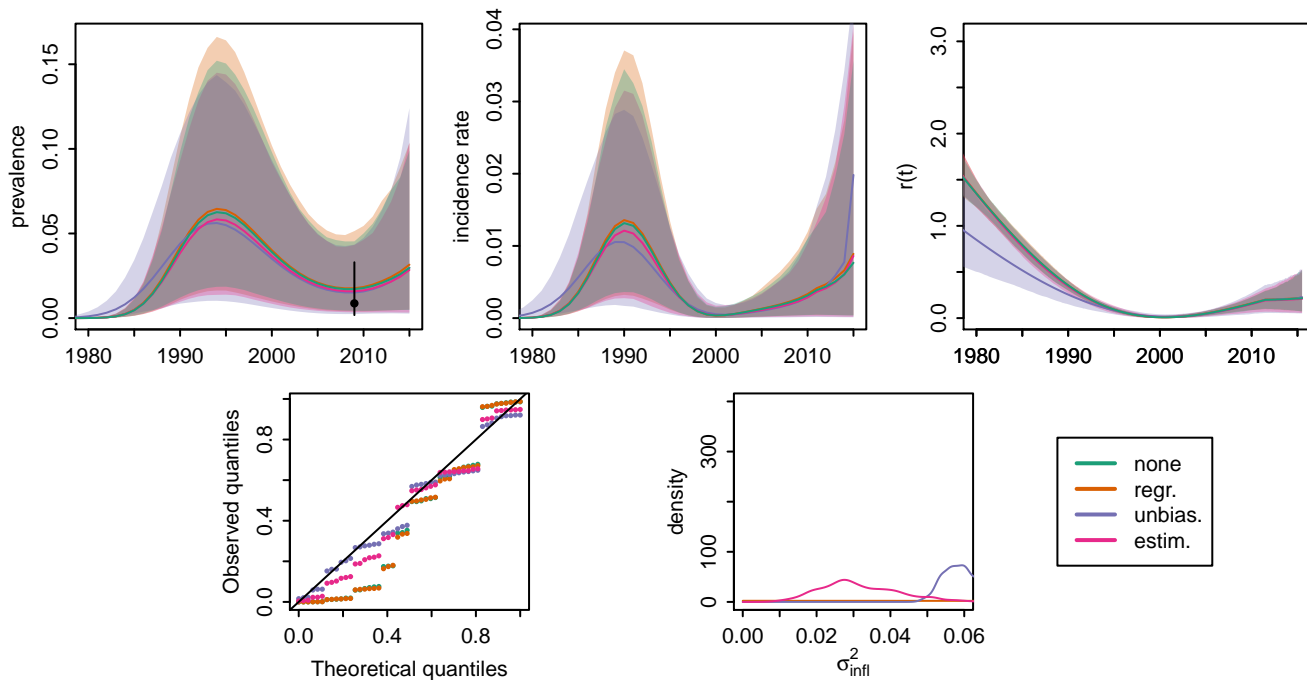

### r-trend

## Kenya Nyanza

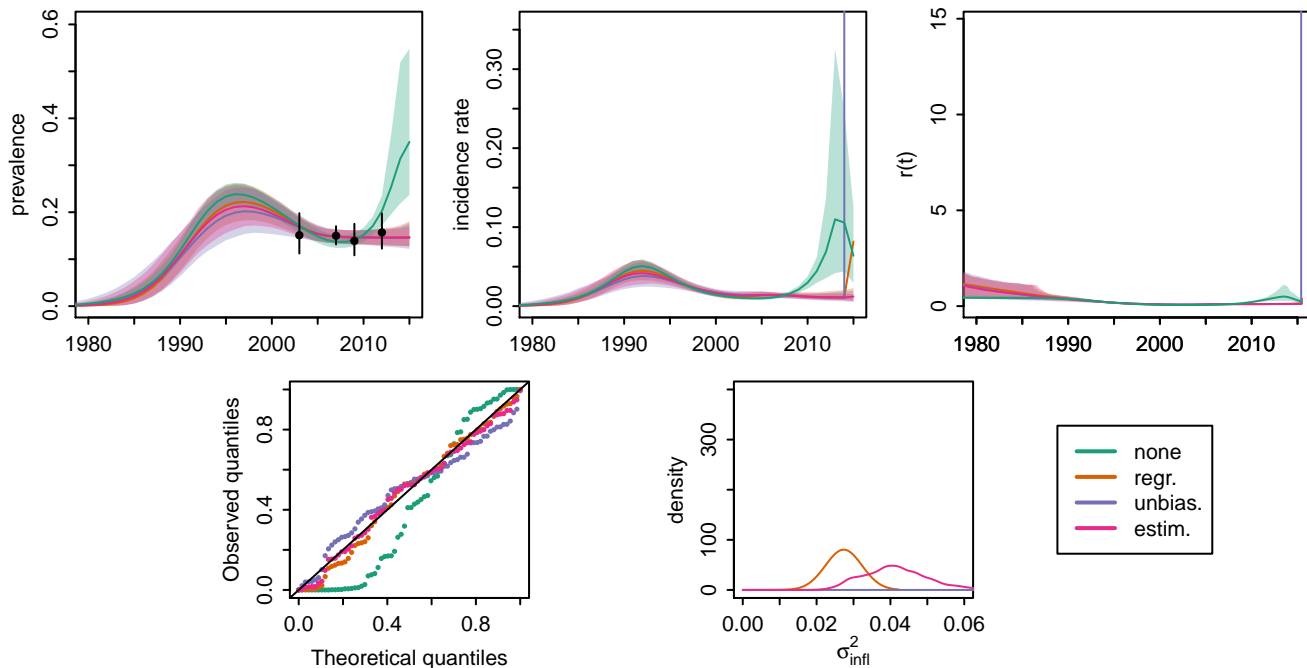

### r-spline

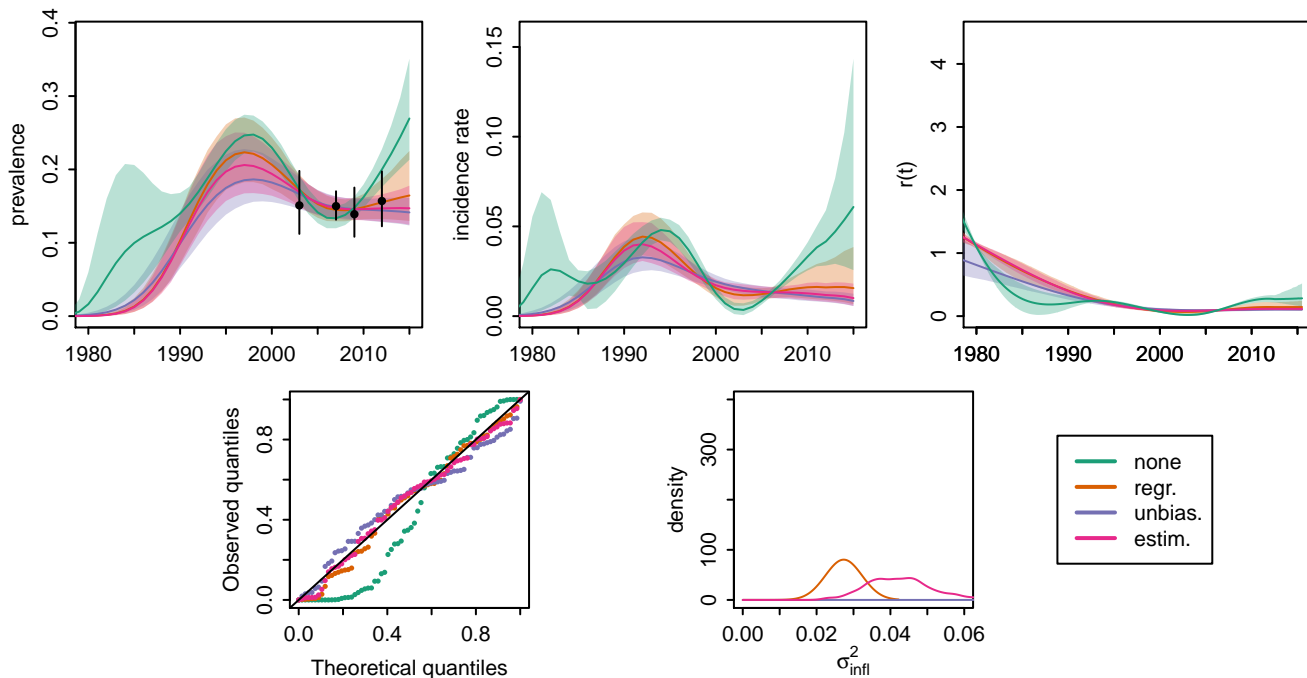

### r-spline, no equil. prior

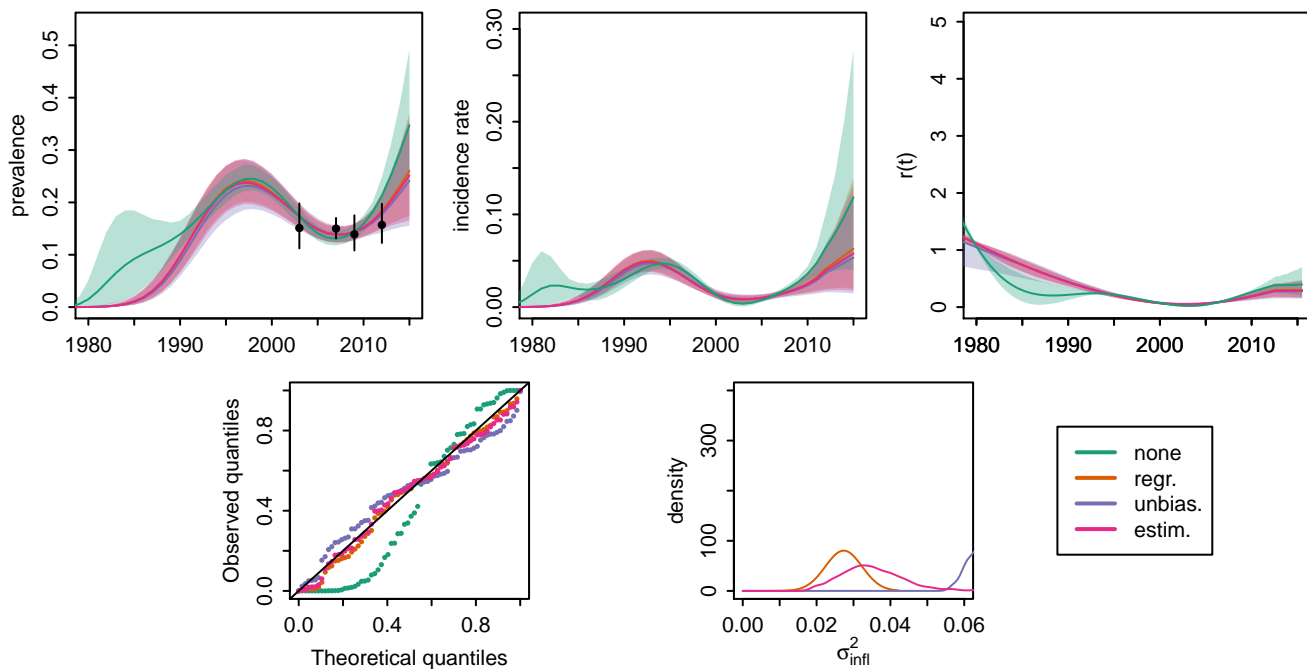

# Kenya Rift Valley

## r-trend

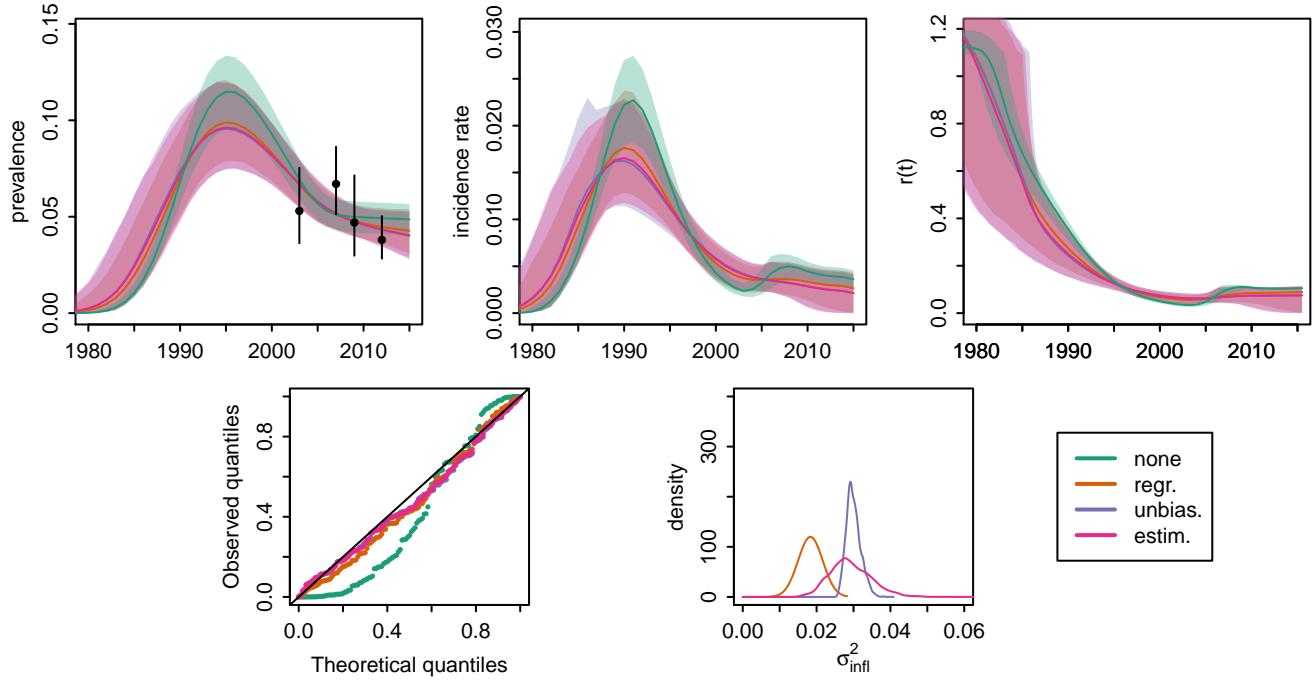

## r-spline

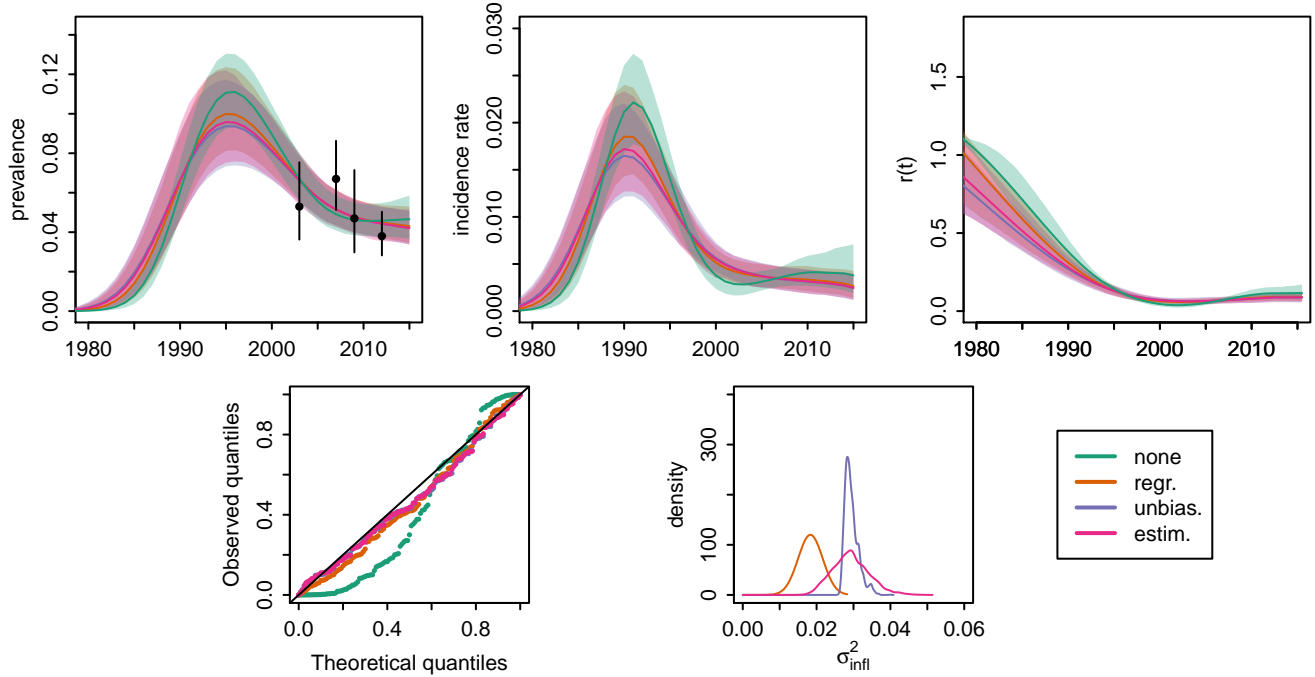

## r-spline, no equil. prior

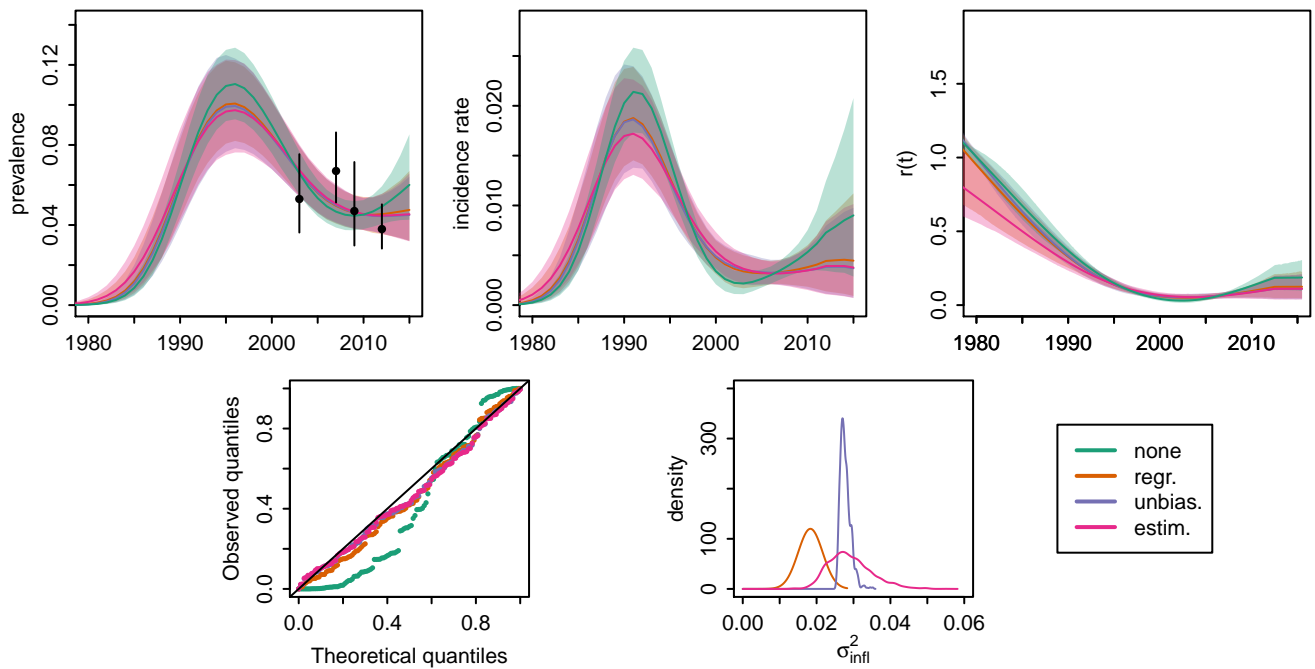

r-trend

# Kenya Western

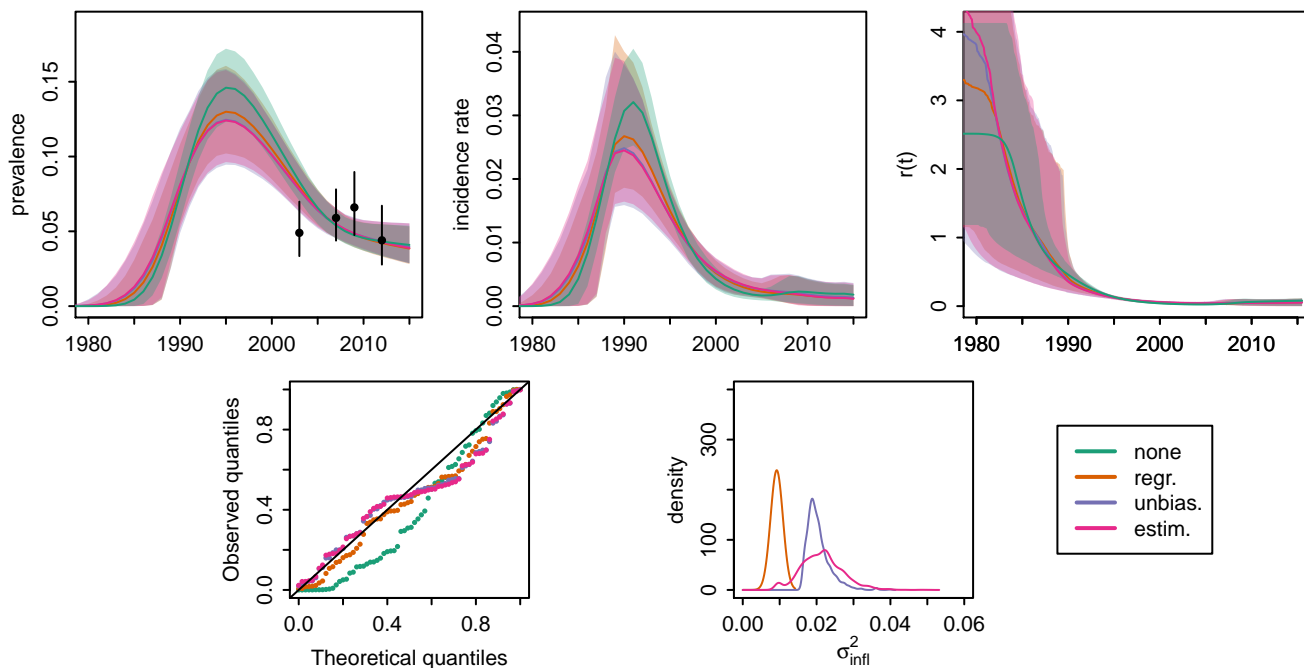

r-spline

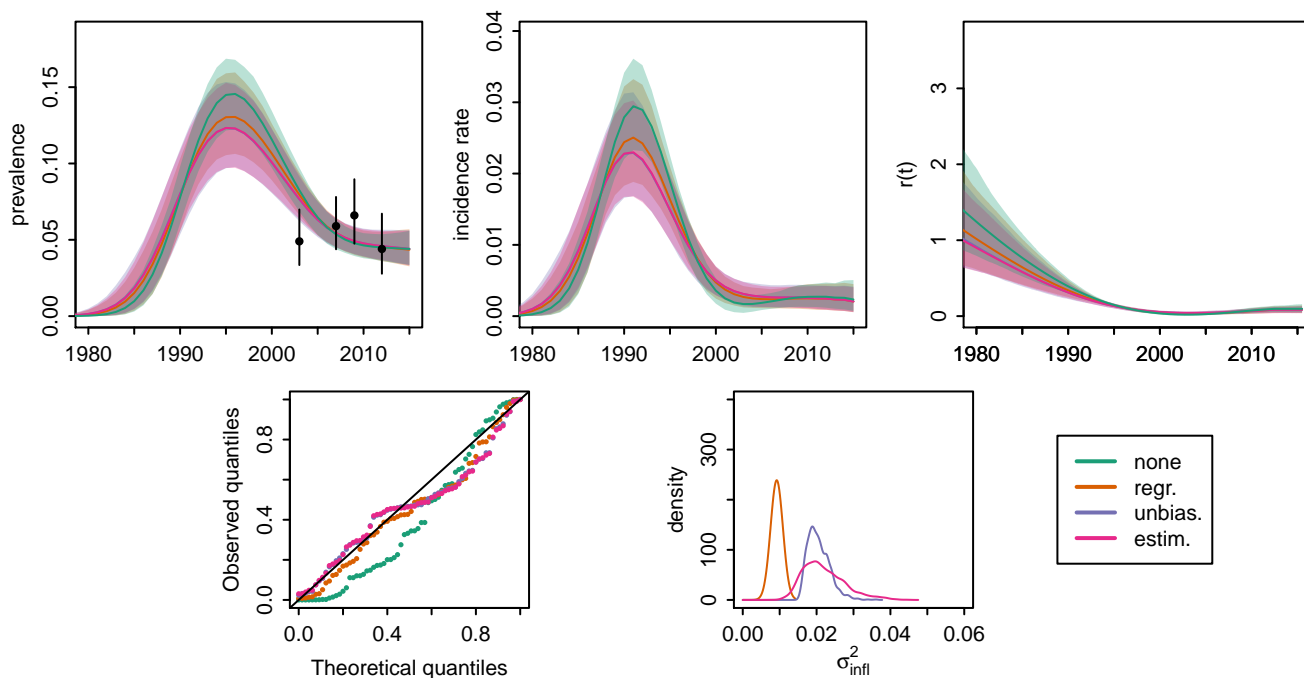

r-spline, no equil. prior

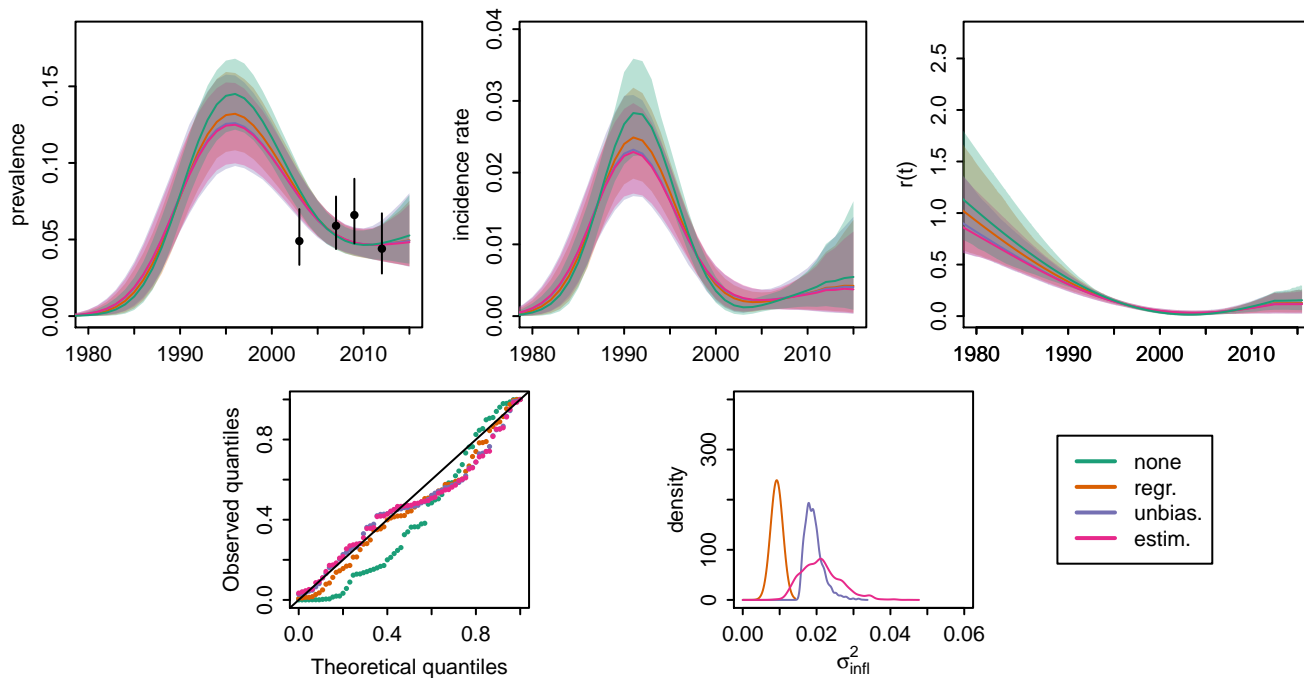

### r-trend

### Zimbabwe Midlands

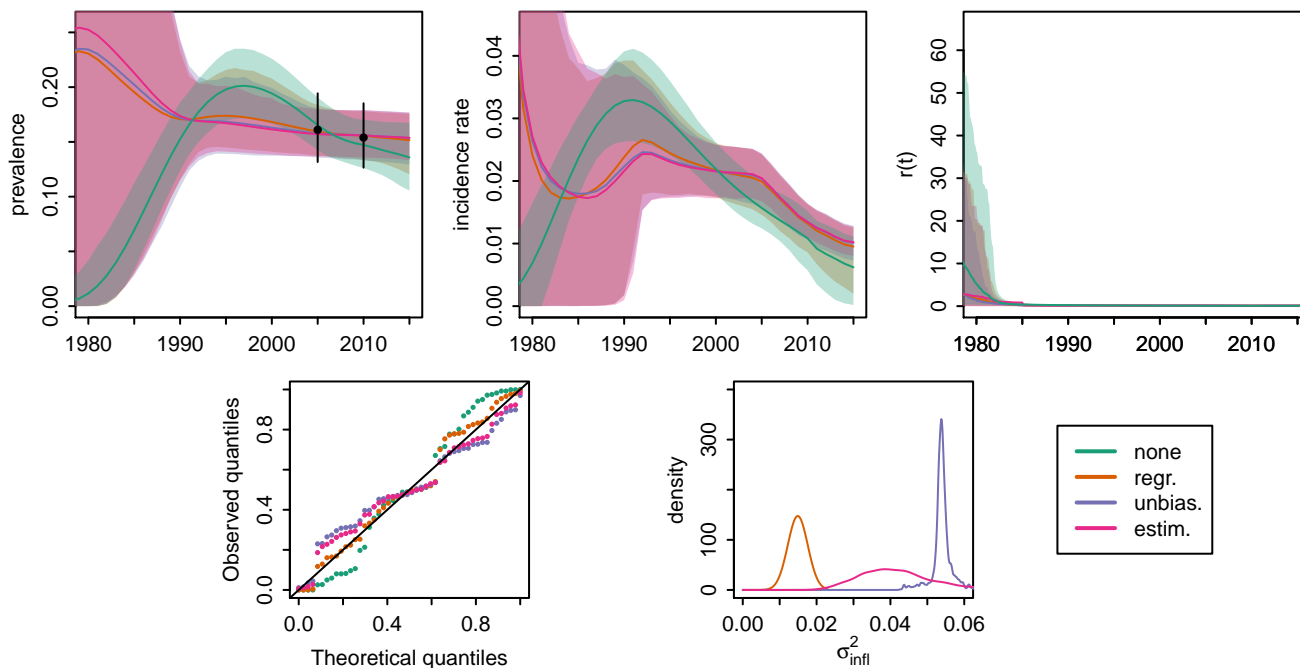

### r-spline

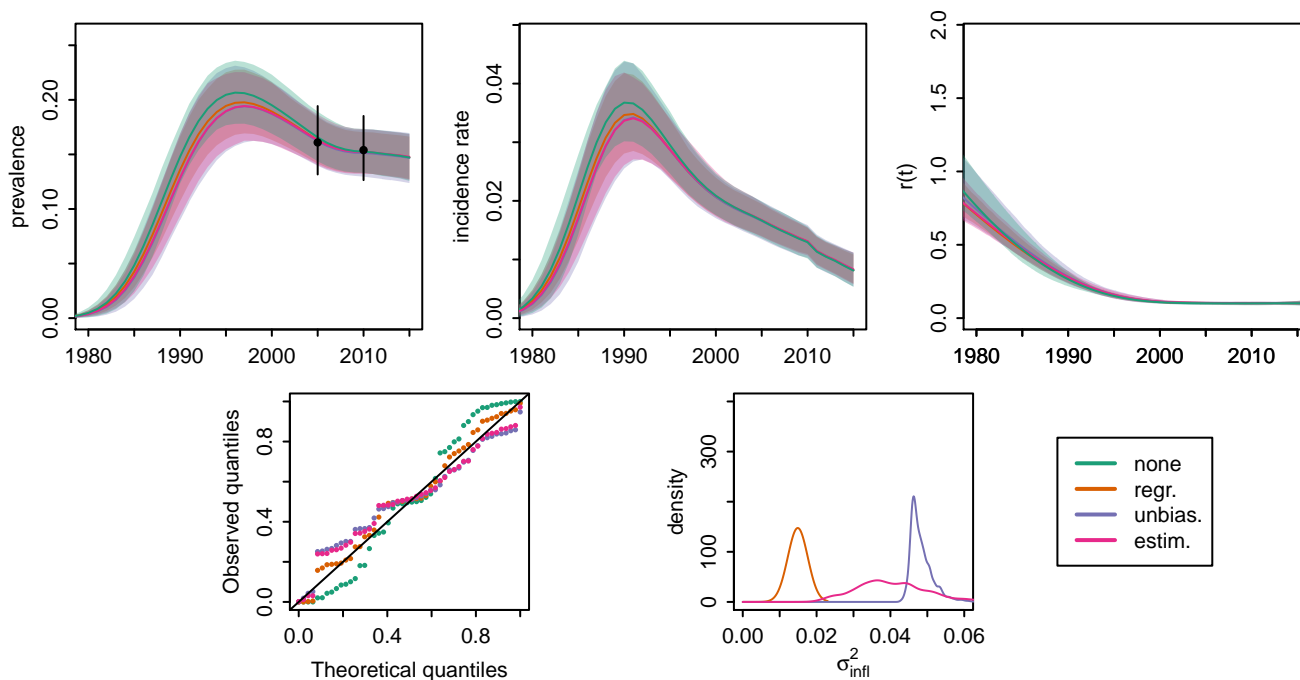

### r-spline, no equil. prior

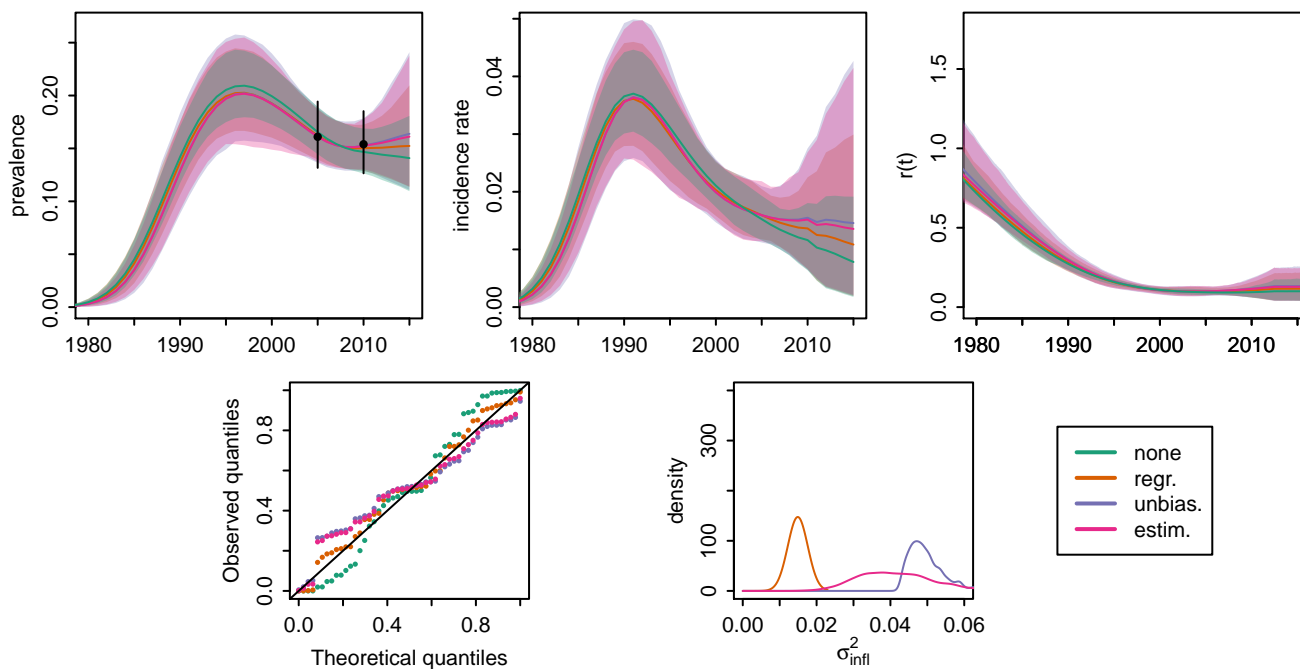

r-trend

# Zimbabwe Matabeleland South

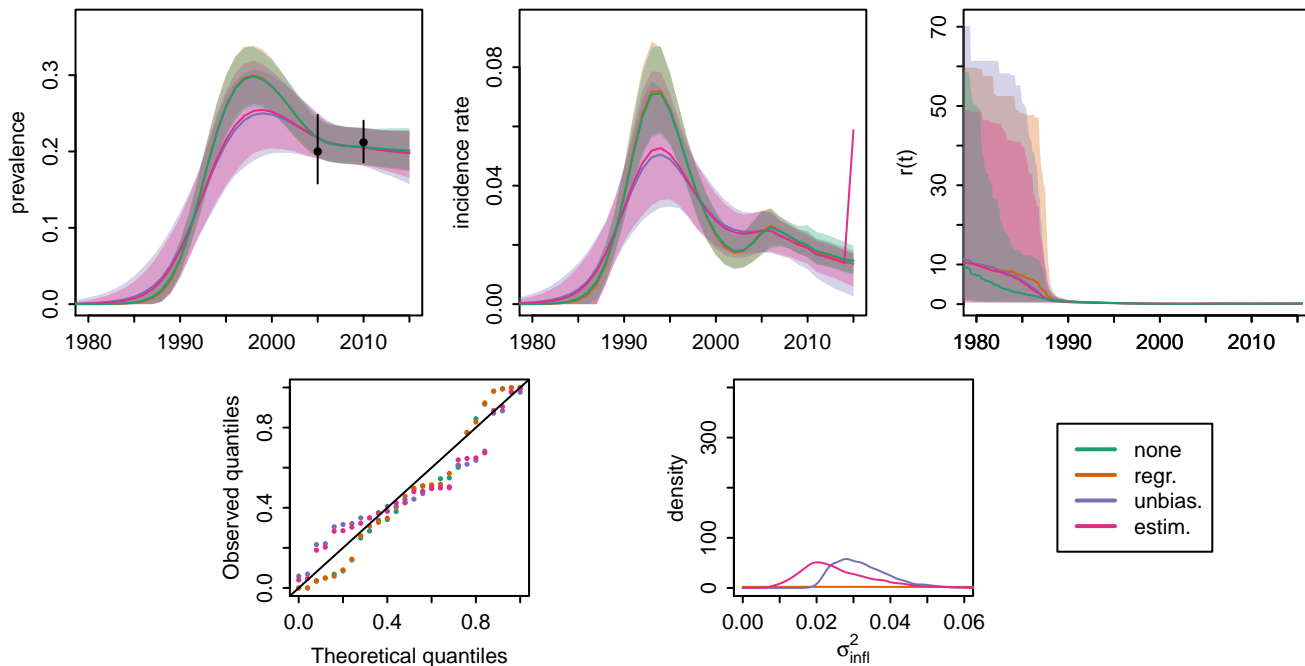

r-spline

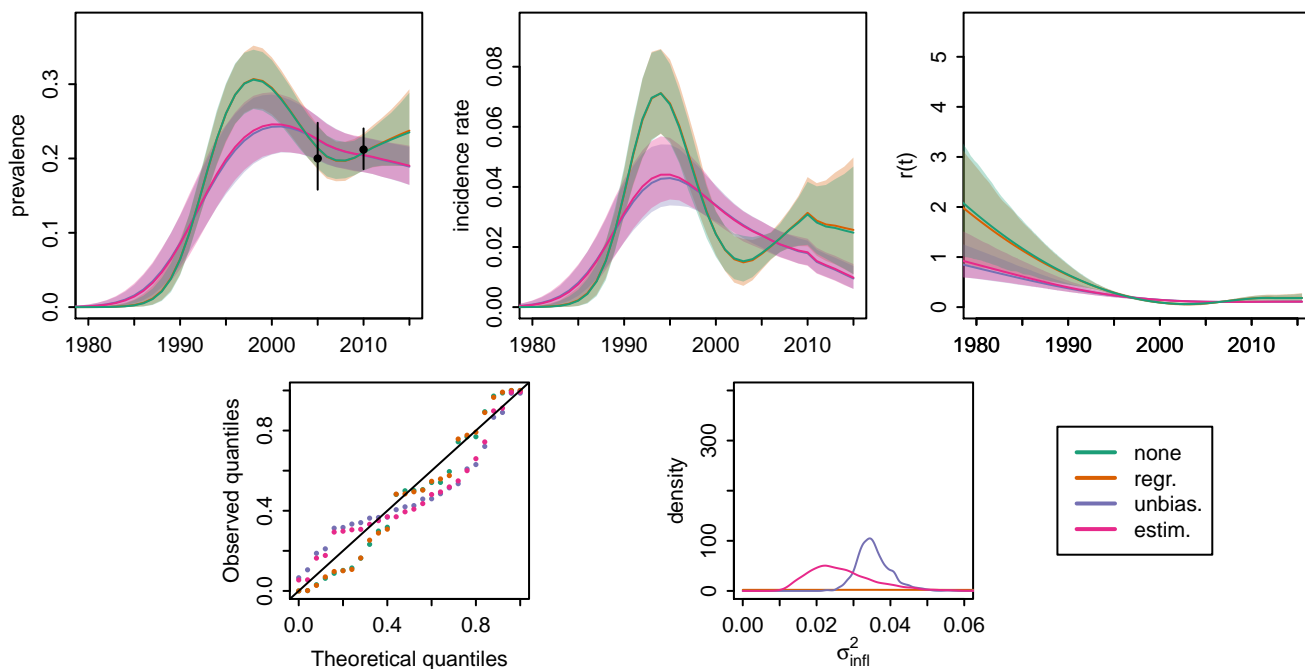

r-spline, no equil. prior

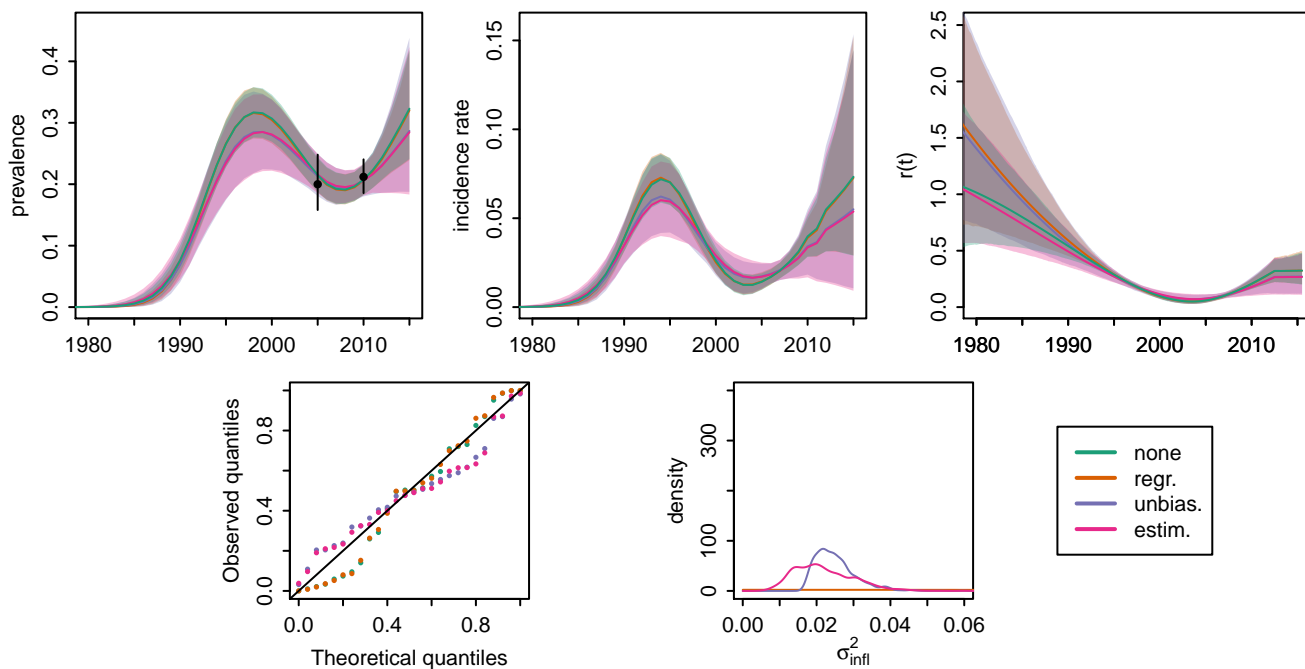



r-trend

# Zimbabwe Matabeleland North

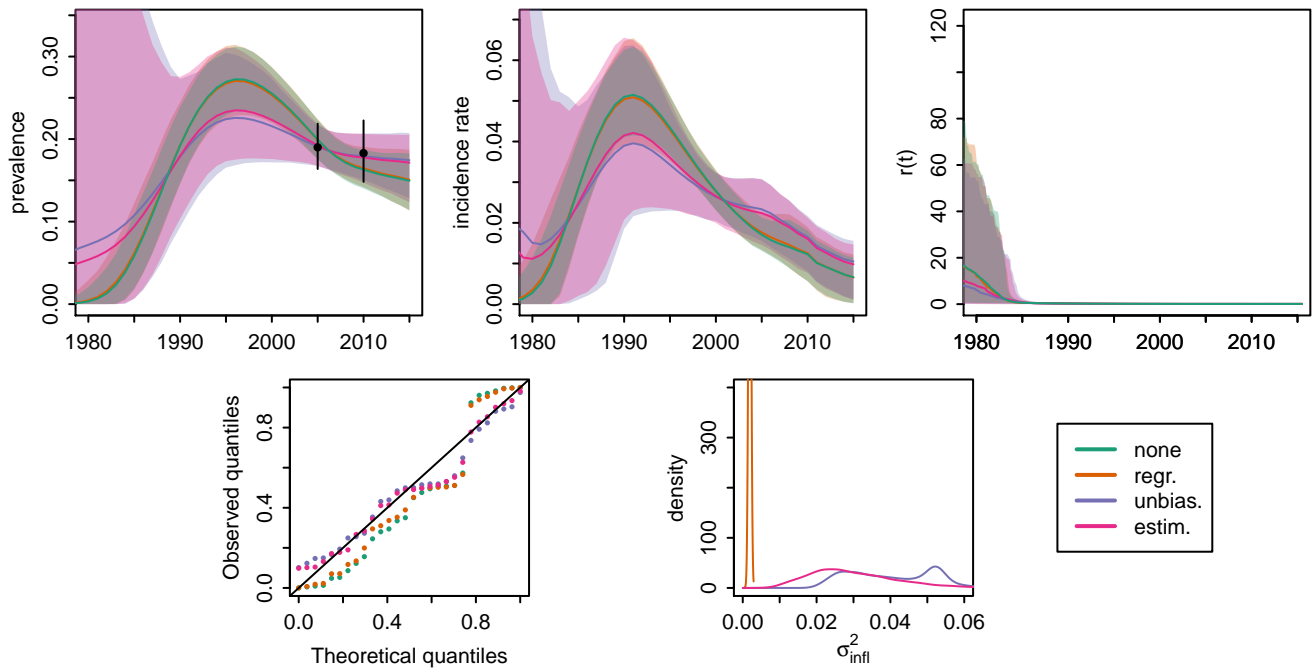

r-spline

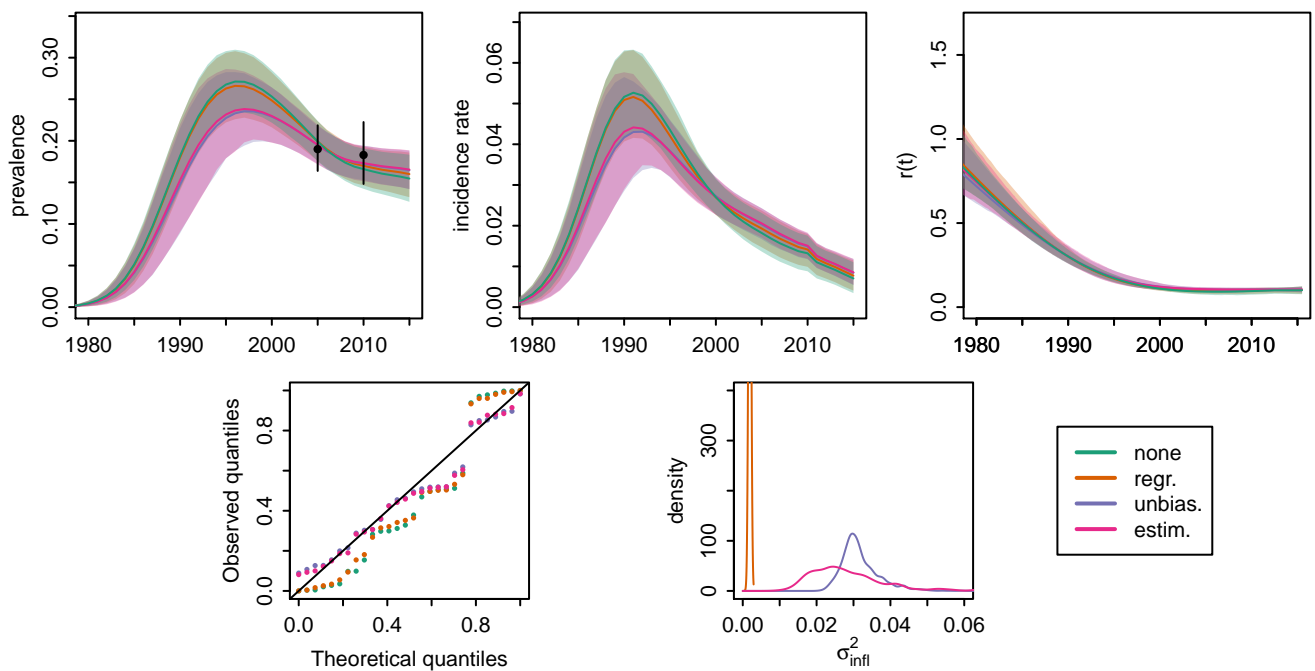

r-spline, no equil. prior

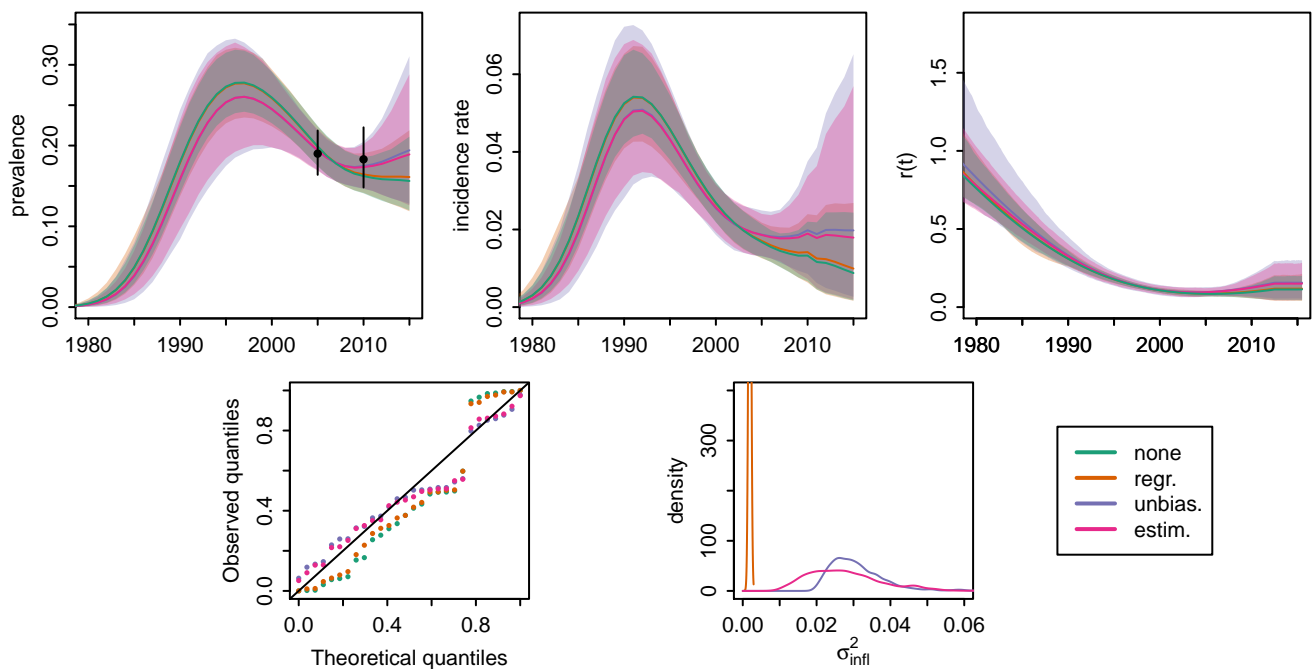

### r-trend

## Zimbabwe Masvingo

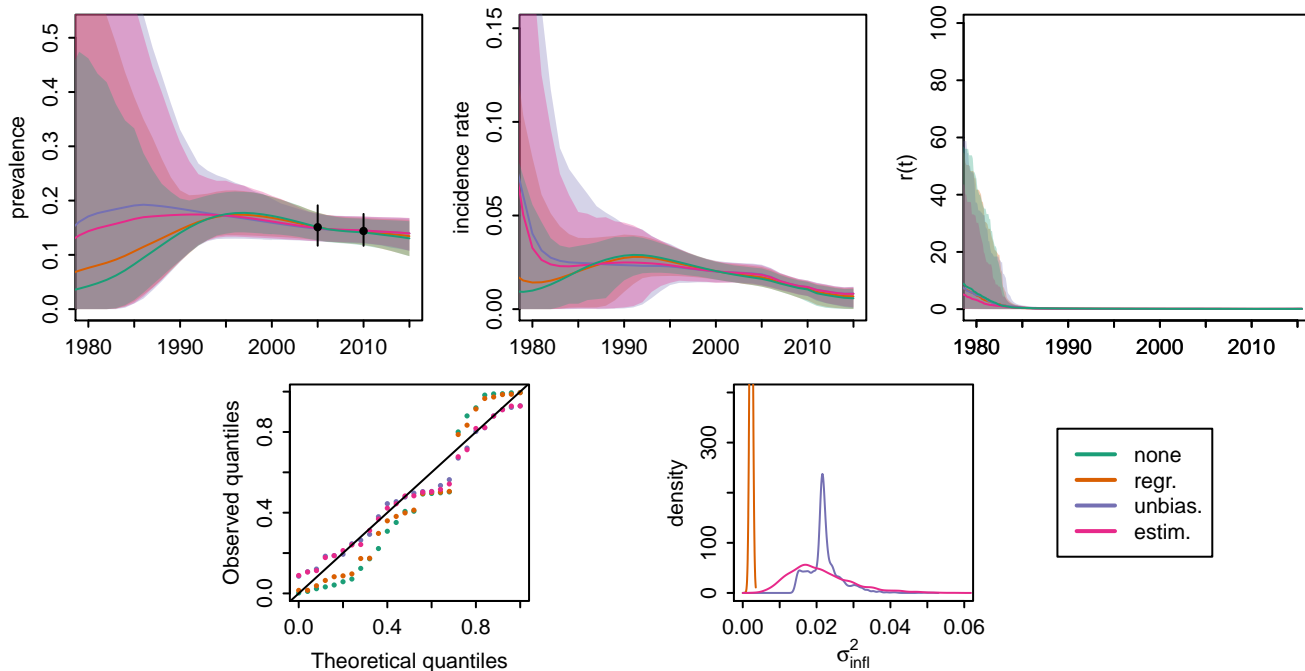

### r-spline

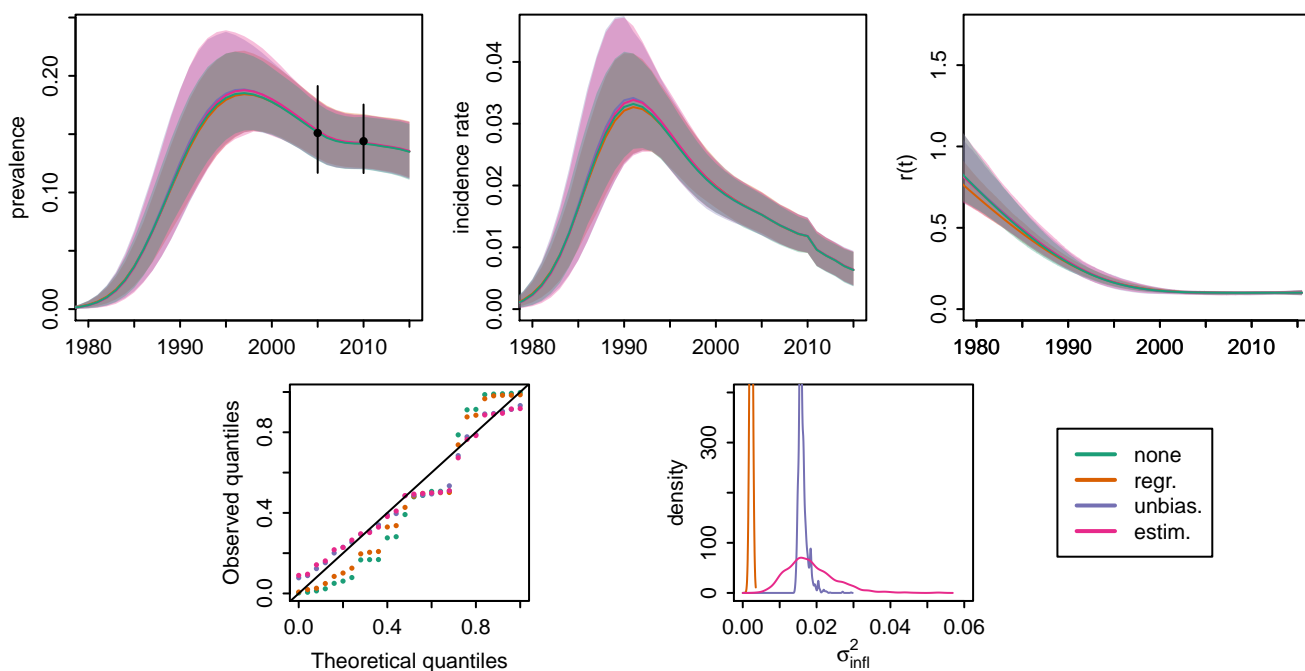

### r-spline, no equil. prior

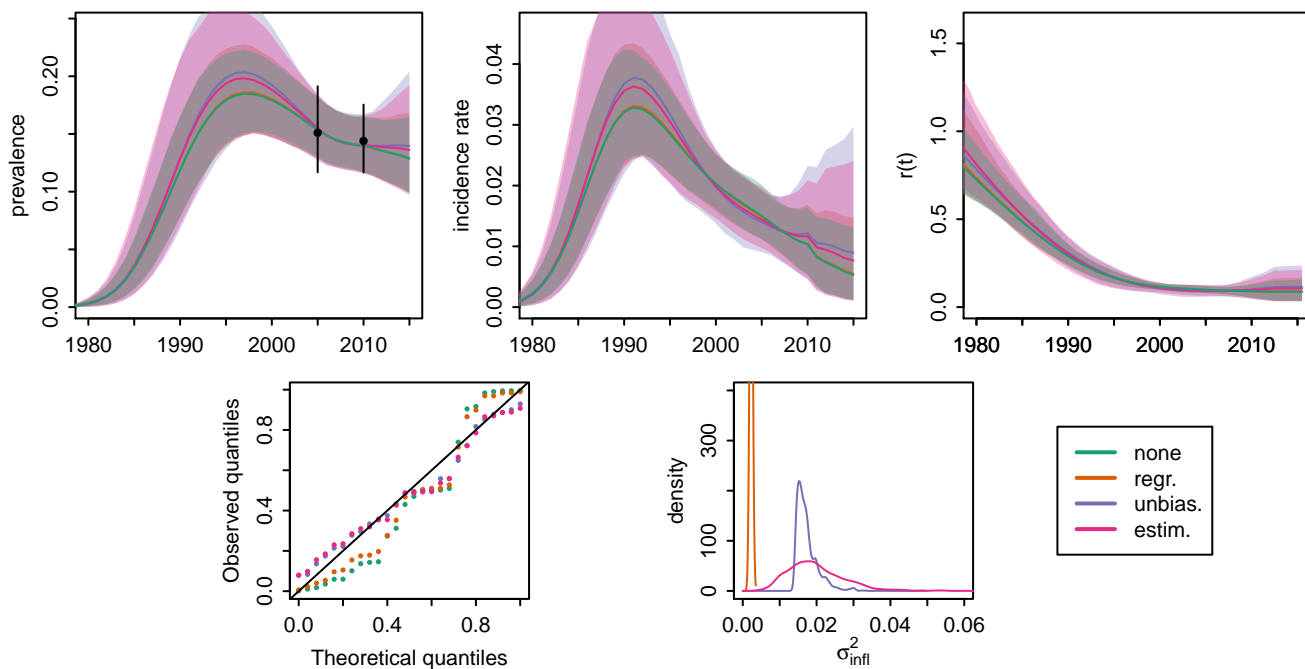

r-trend

# Zimbabwe Mashonaland West

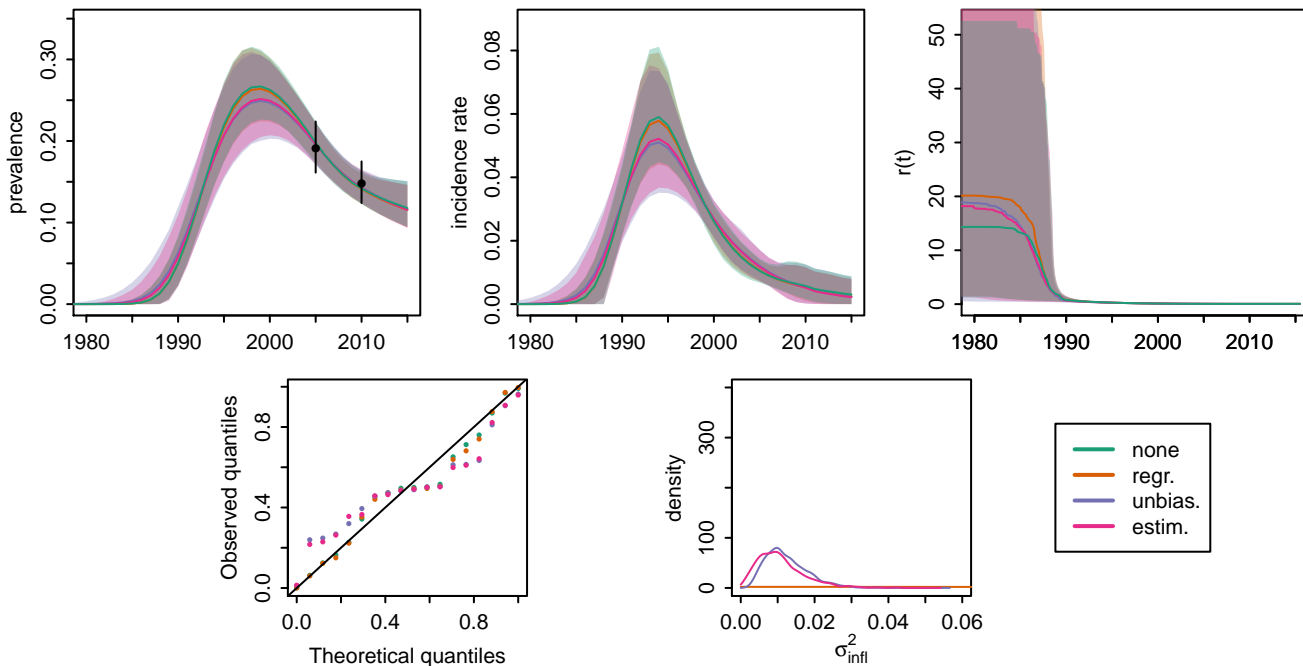

r-spline

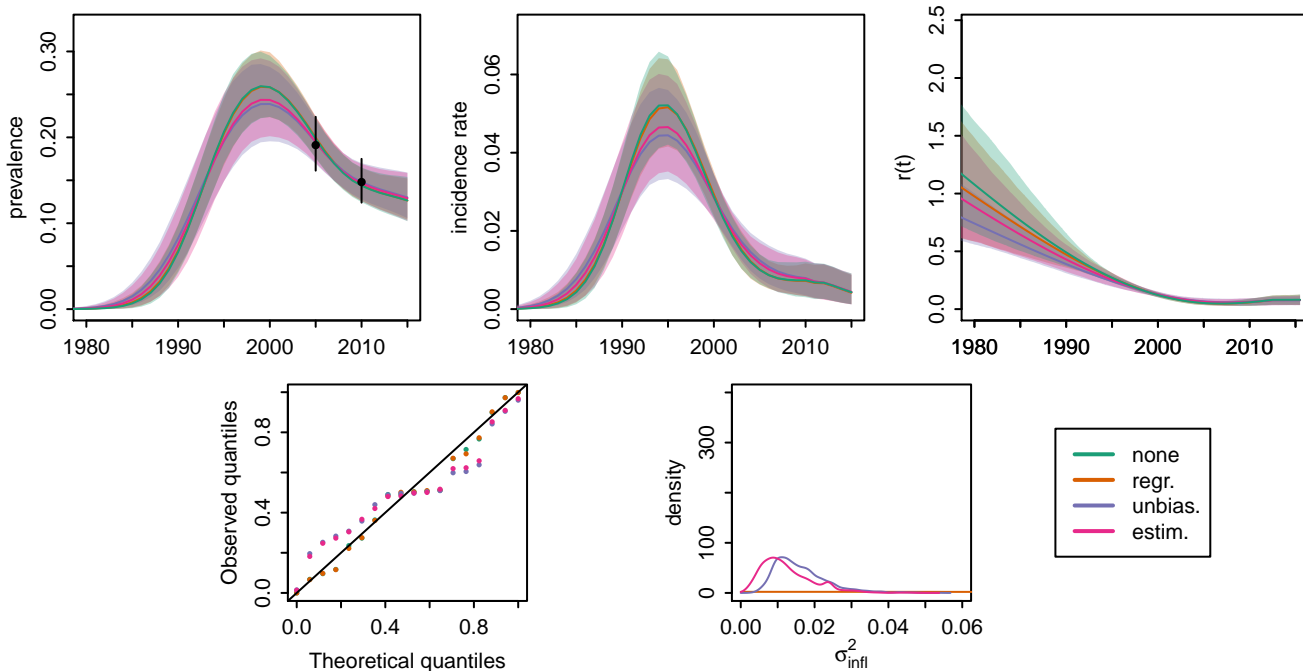

r-spline, no equil. prior

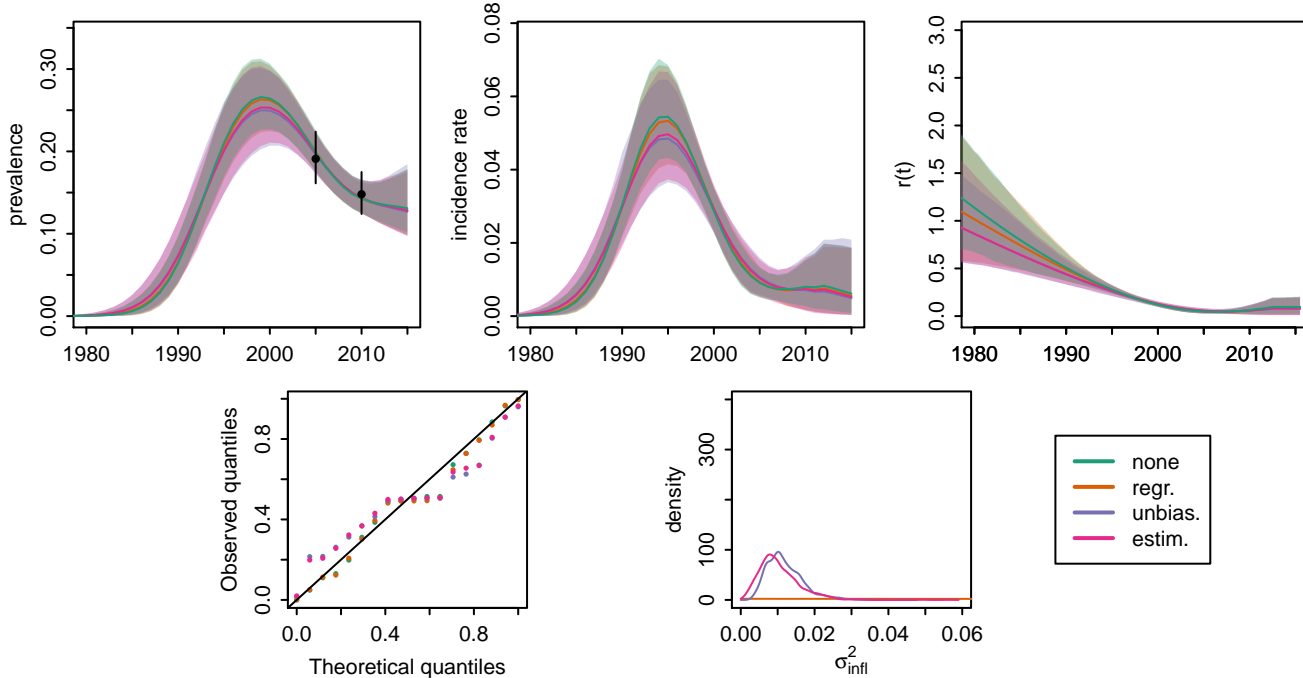

### r-trend

## Zimbabwe Mashonaland Central

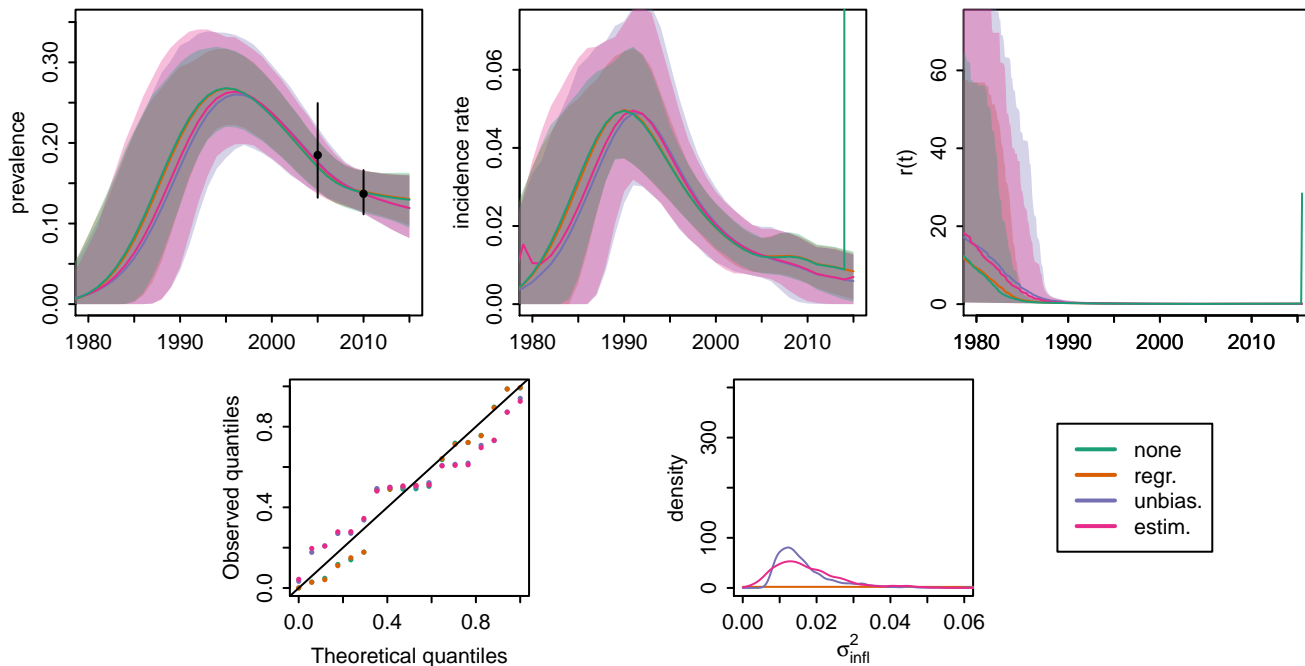

### r-spline

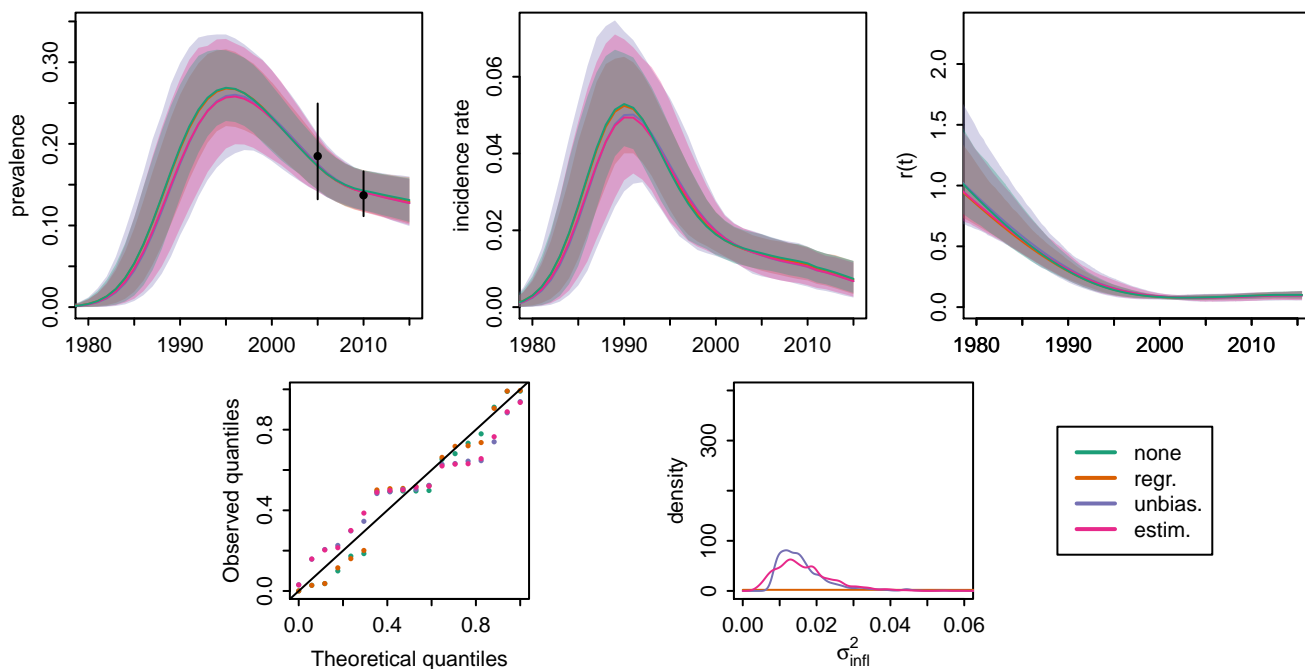

### r-spline, no equil. prior

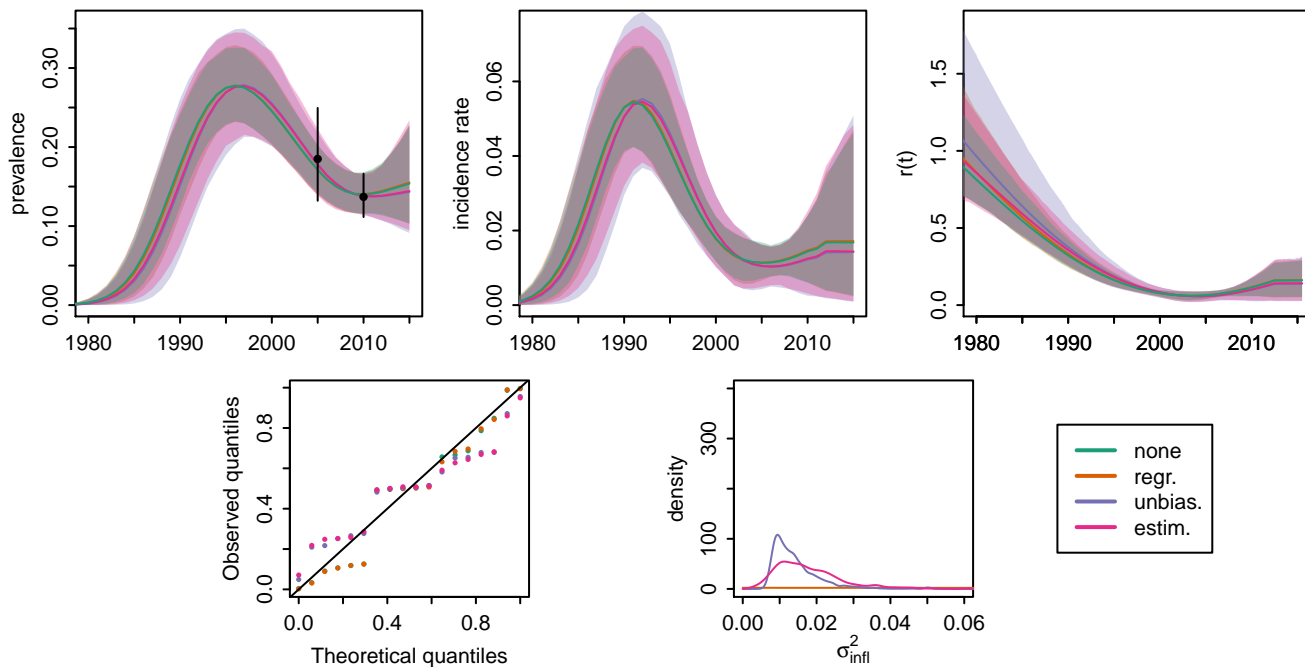

r-trend

# Zimbabwe Manicaland

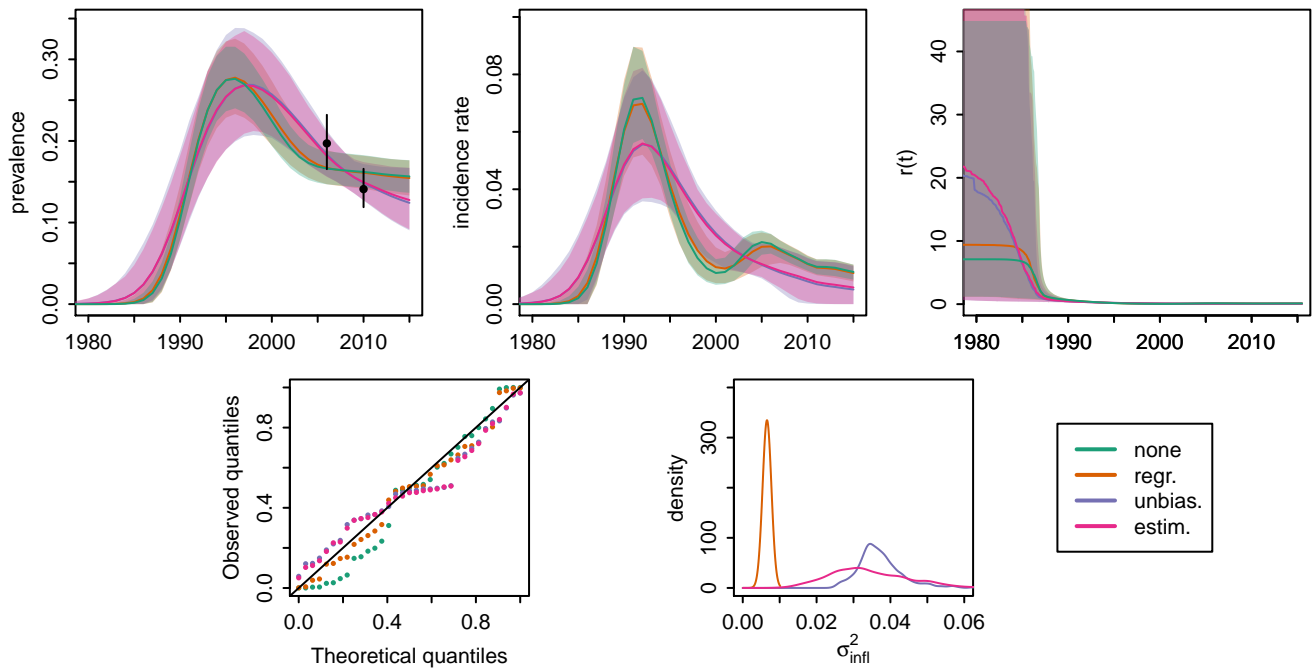

r-spline

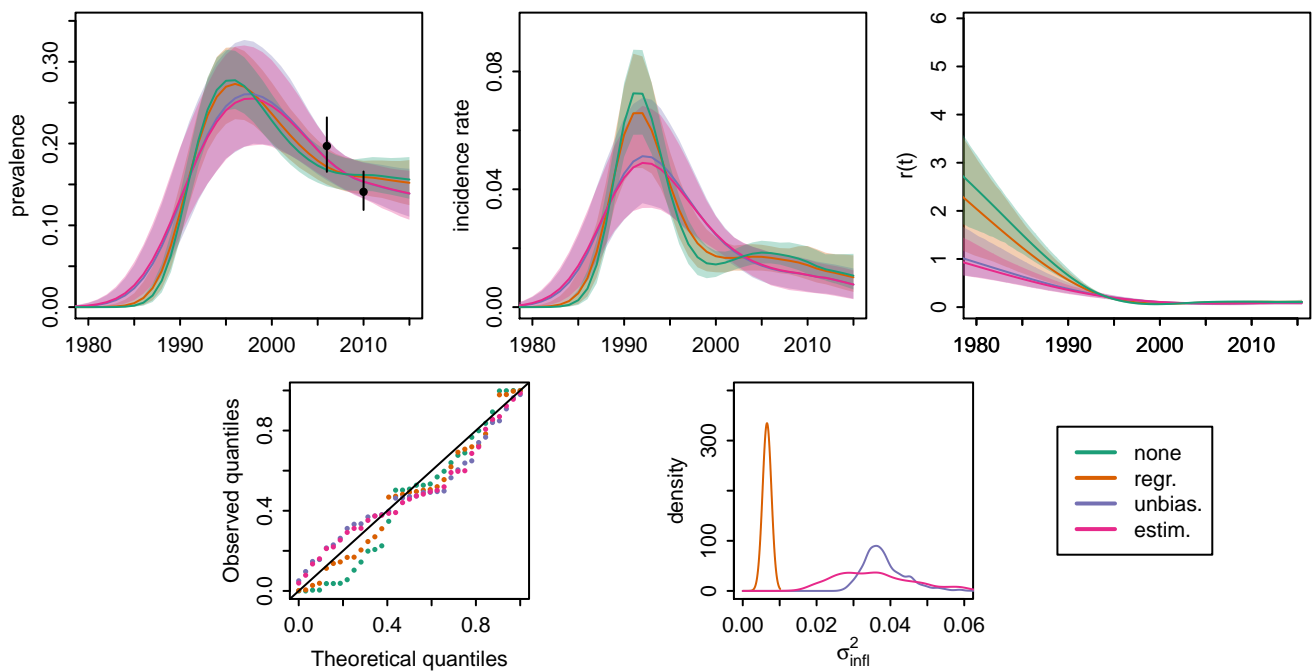

r-spline, no equil. prior

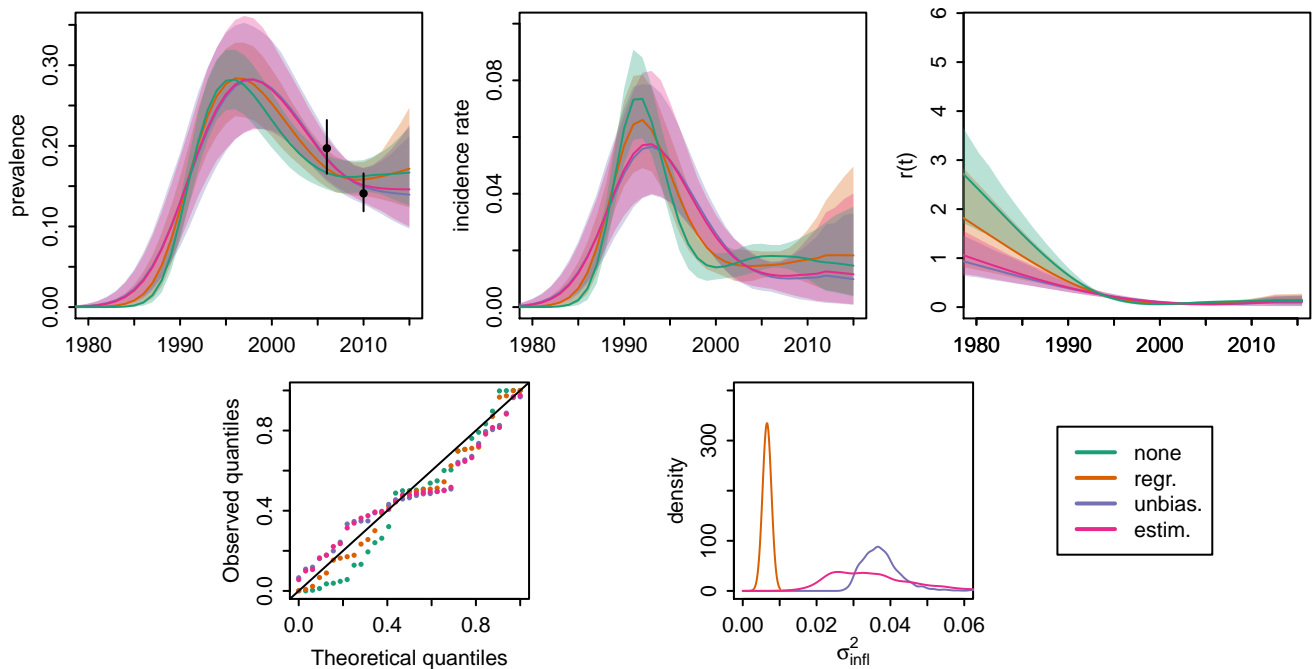

### r-trend

## Zimbabwe Harare

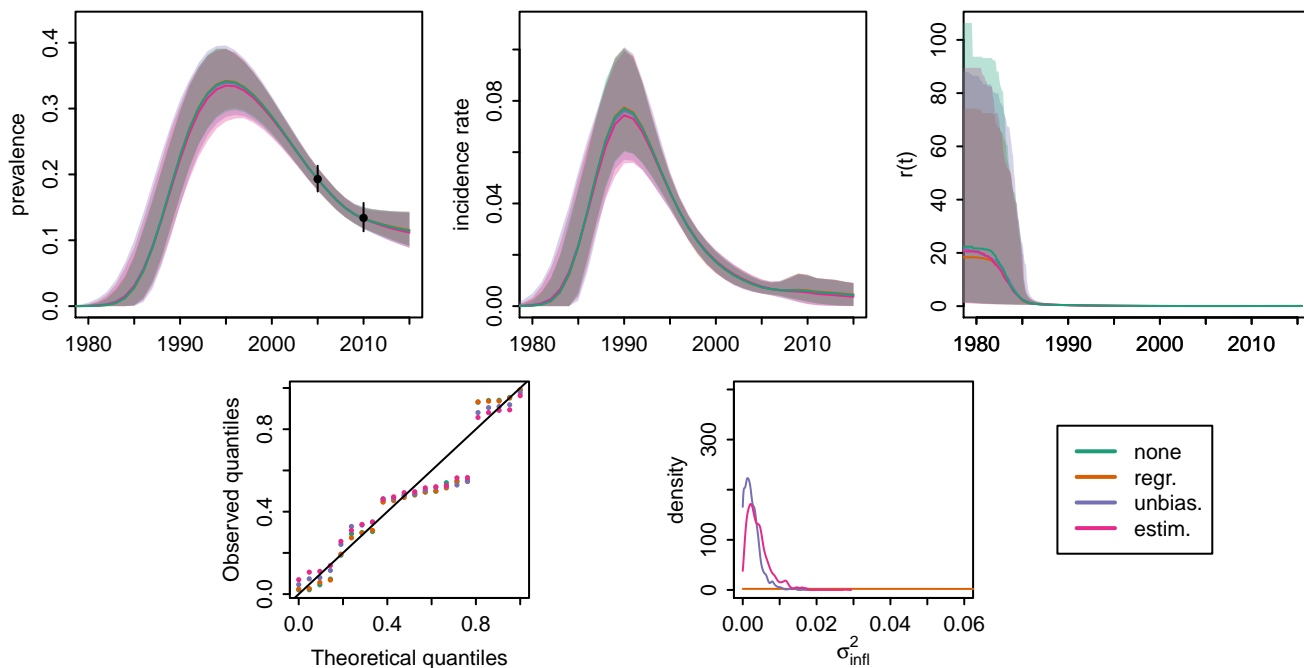

### r-spline

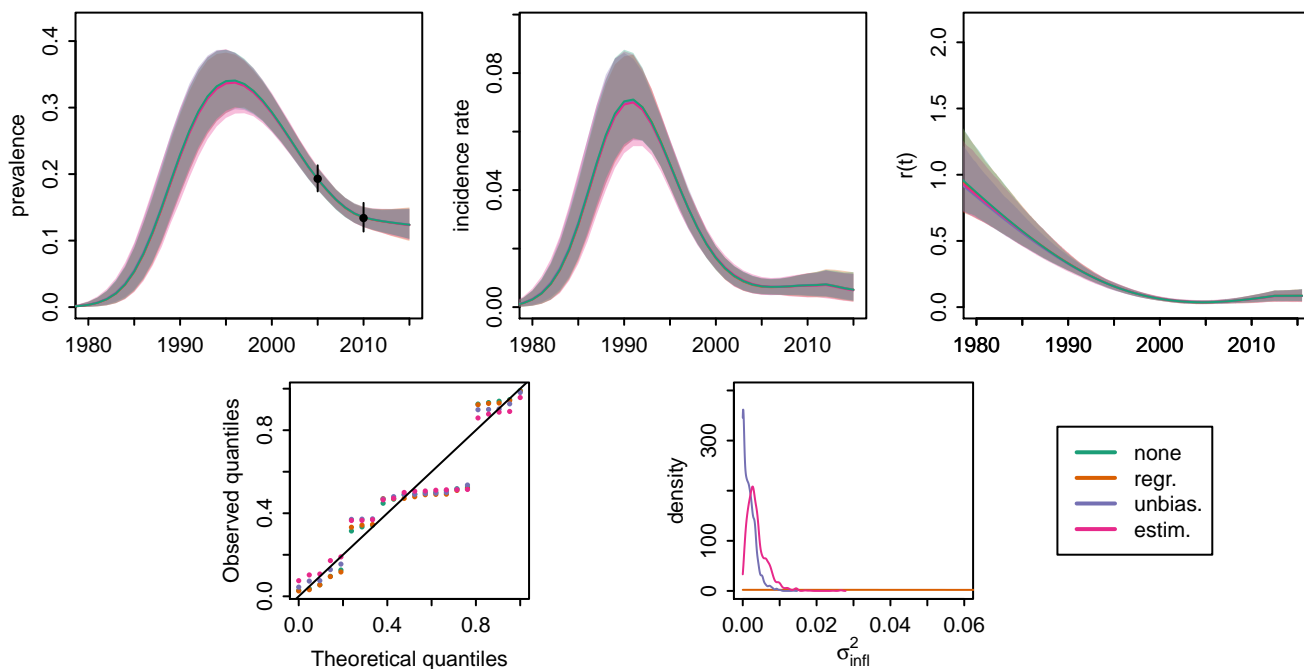

### r-spline, no equil. prior

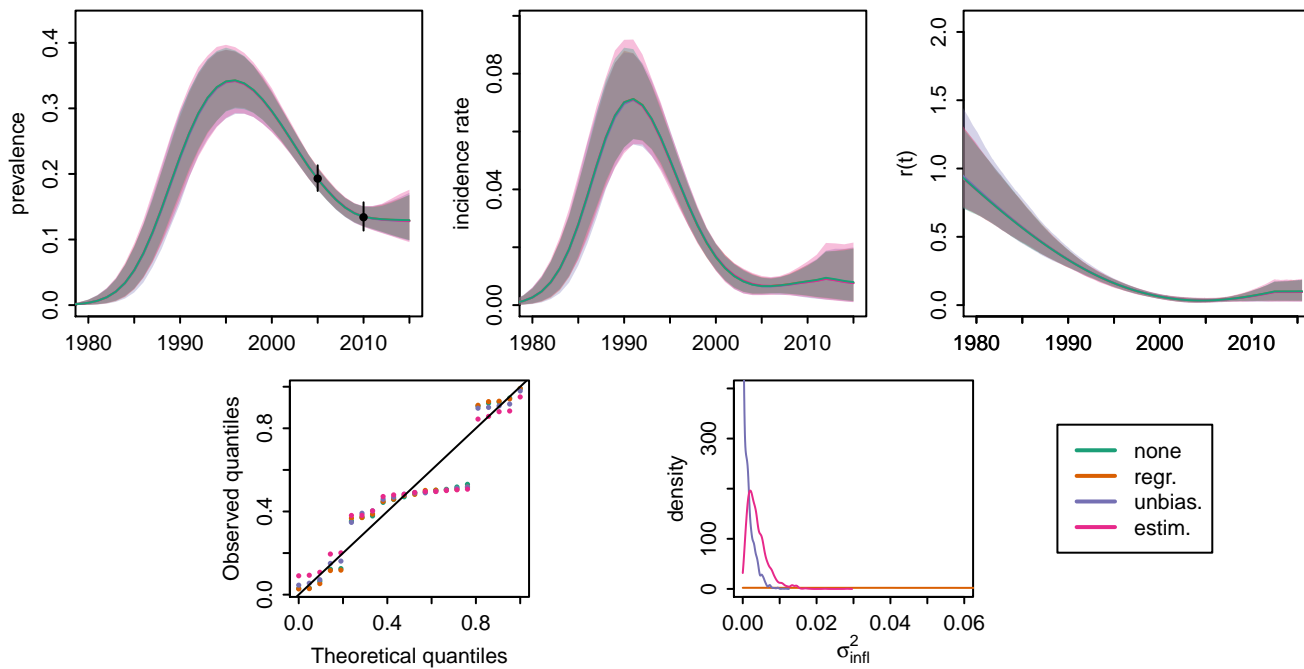

r-trend

# Zimbabwe Mashonaland East

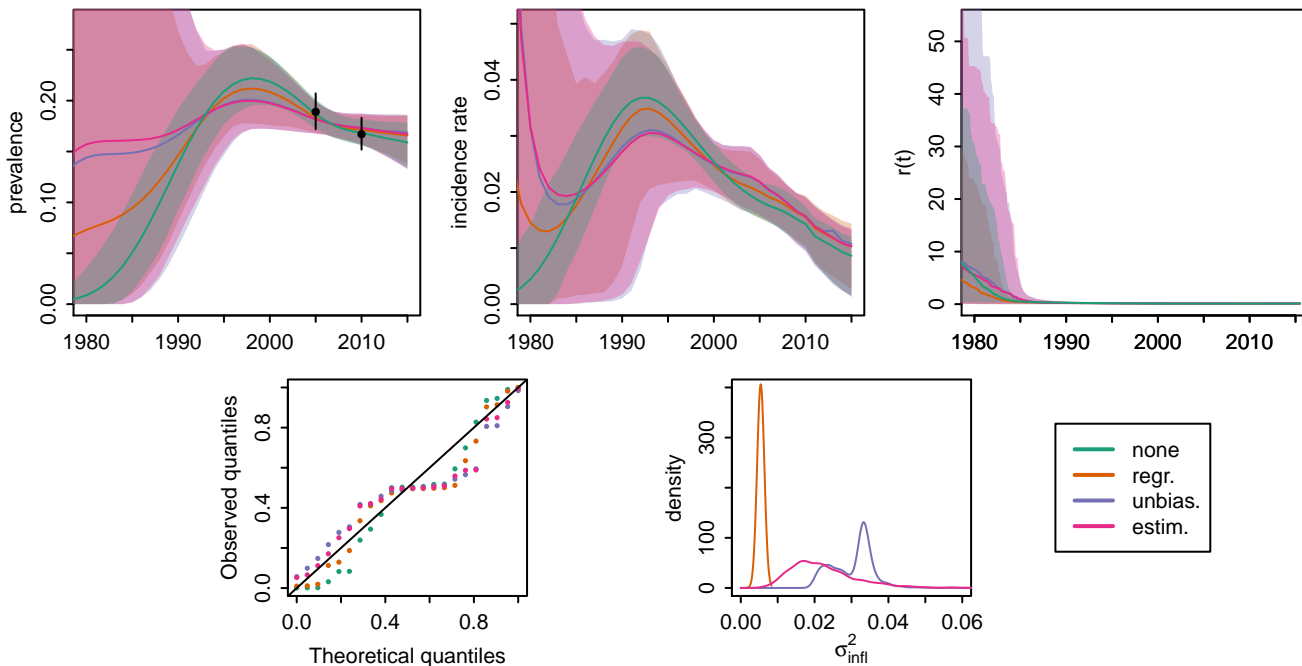

r-spline

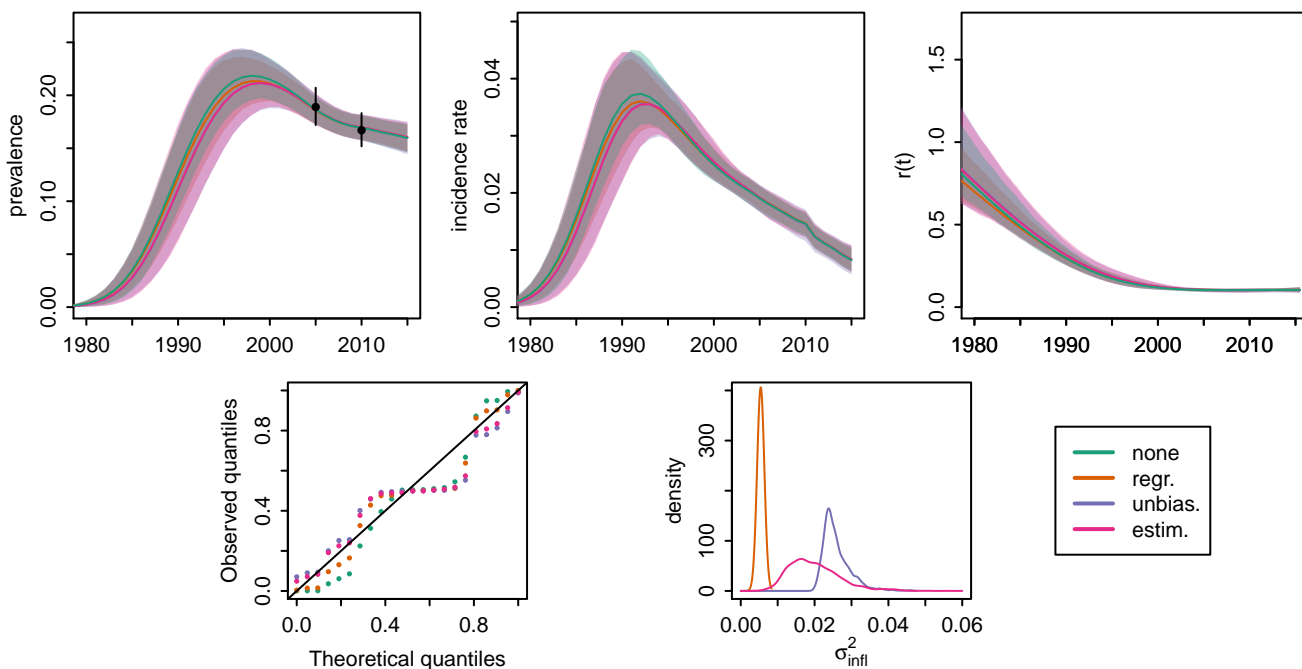

r-spline, no equil. prior

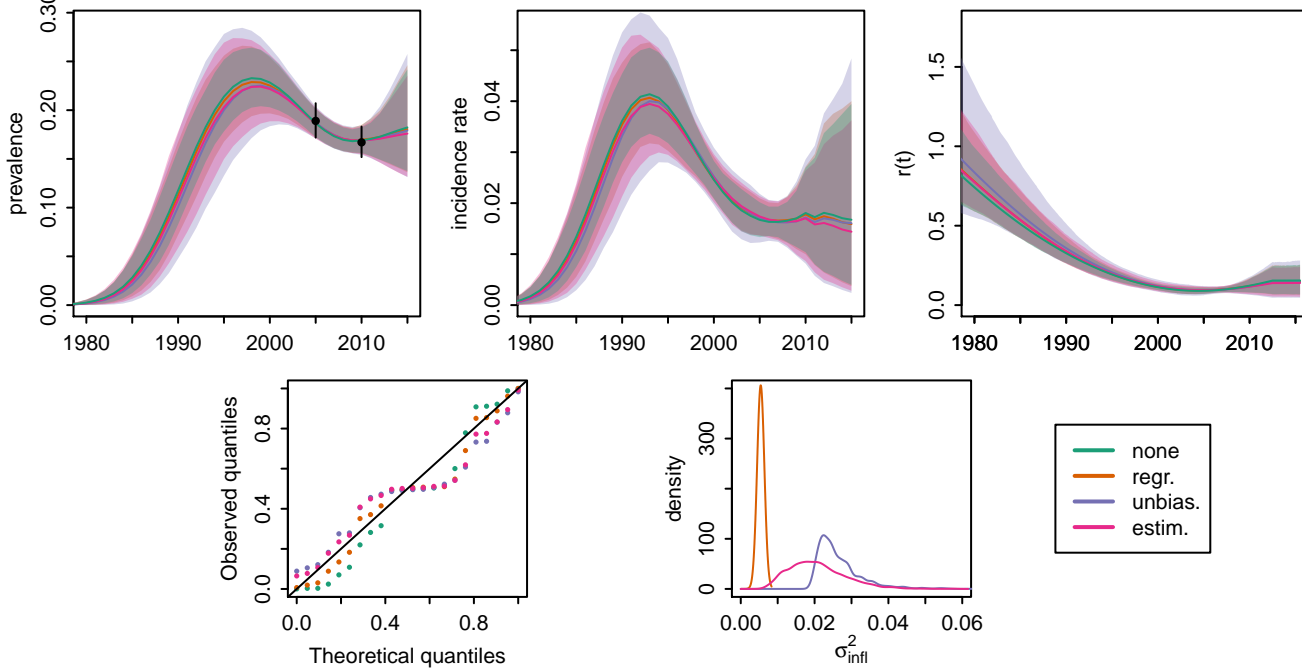

r-trend

Zimbabwe Bulawayo

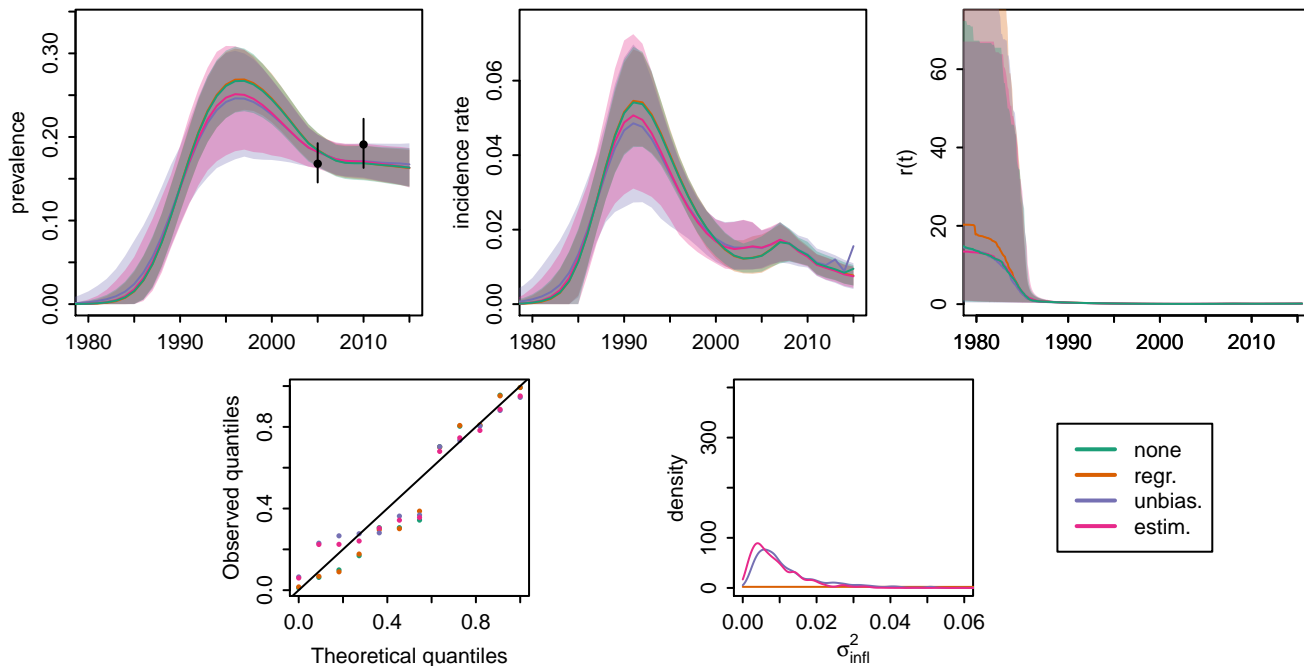

r-spline

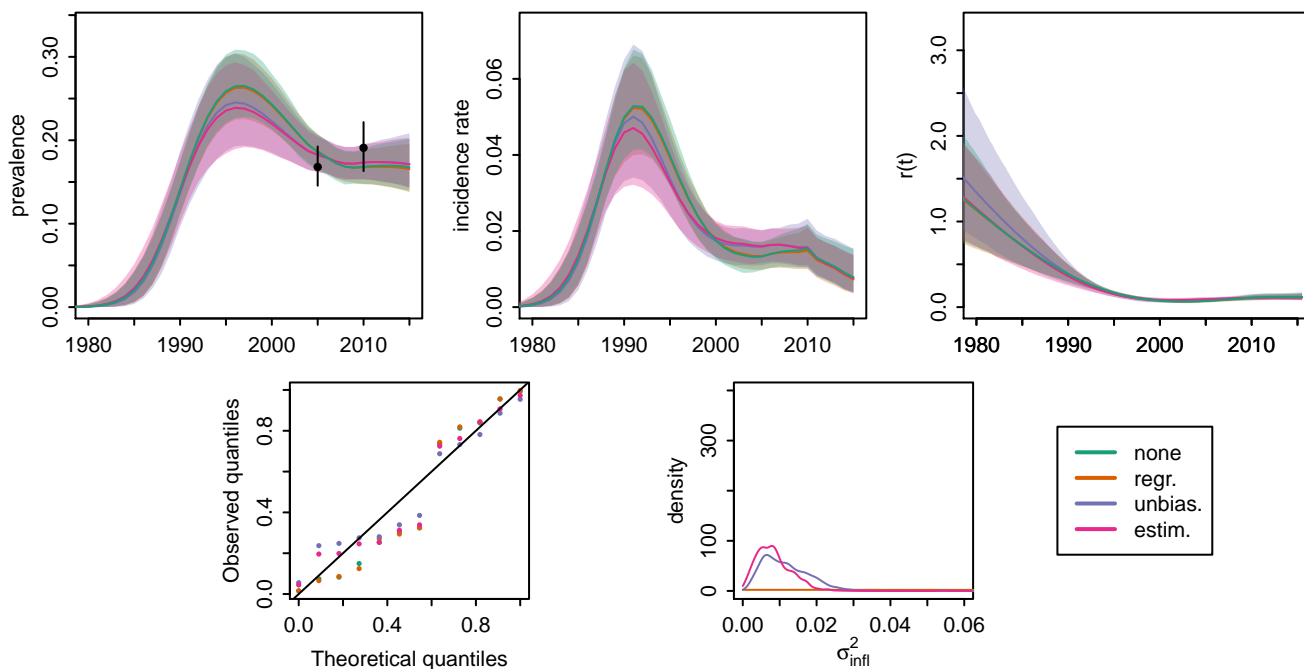

r-spline, no equil. prior

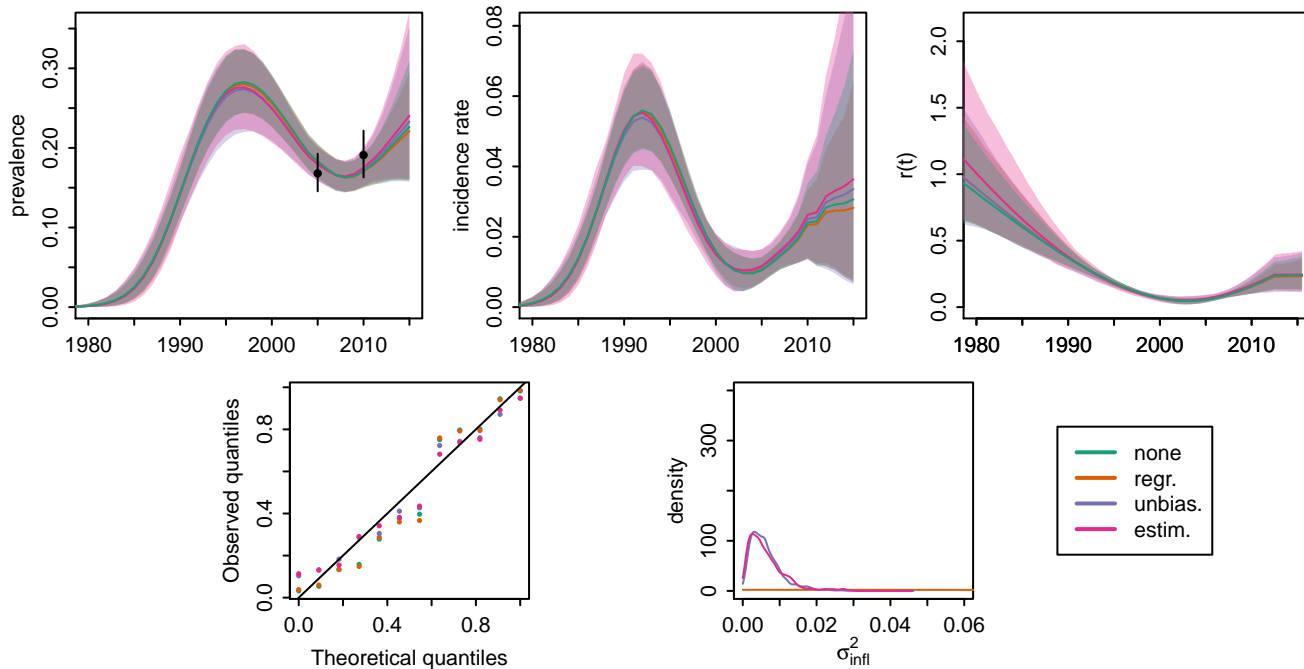

Supplement: NIHMS917413-supplement-1.pdf [file NIHMS917413-supplement-1.pdf]
